# Supplementary material for: LC-MS Orbitrap-based metabolomics using a novel hybrid zwitterionic hydrophilic interaction liquid chromatography and rigorous metabolite identification reveals doxorubicin-induced metabolic perturbations in breast cancer cells
Source: Royal Society of Chemistry journal article supplement (doi:10.1039/d5ra01044f), 2025-01-01
Supplement: d5ra01044f1.xlsx [file d5ra01044f1.xlsx]

## Sheet: Title Page
Electronic supplementary information 1
LC-MS Orbitrap-based metabolomics using a novel hybrid zwitterionic hydrophilic interaction liquid chromatography and rigorous metabolite identification reveals doxorubicin-induced metabolic perturbations in breast cancer cells
Salah Abdelrazig*1,4, Áine McCabe2, Alia Yasin2, Rajneil Chaudhary1, Michael A. Ochsenkühn1, David Scicchitano2, 3, Shady A. Amin*1,4,5
1Marine Microbiomics Lab, Biology Program, New York University Abu Dhabi (NYUAD), P.O. Box 129188, Abu Dhabi, United Arab Emirates
2Division of Science, New York University Abu Dhabi, P.O. Box 129188, Abu Dhabi, United Arab Emirates
3Department of Biology, New York University, 24 Waverly Place, 6th Floor, New York, New York 10003, United States
4Mubadala ACCESS, New York University Abu Dhabi (NYUAD), P.O. Box 129188, Abu Dhabi, United Arab Emirates
5Center for Genomics and Systems Biology, New York University Abu Dhabi (NYUAD), P.O. Box 129188, Abu Dhabi, United Arab Emirates
*Salah Abdelrazig and Shady A. Amin are co-corresponding authors.
Corresponding authors:
Salah Abdelrazig
Marine Microbiomics Lab, Biology Program, New York University Abu Dhabi (NYUAD), P.O. Box 129188, Abu Dhabi, United Arab Emirates
Email: salah.Abdelrazig@nyu.edu
Shady A. Amin
Marine Microbiomics Lab, Biology Program, New York University Abu Dhabi (NYUAD), P.O. Box 129188, Abu Dhabi, United Arab Emirates
Email: samin@nyu.edu

## Sheet: Table S1
Table S1 Details of the authentic standards (4 µg/mL) used for LC-MS method development, evaluation and metabolite identification
No	Analytical standard	KEGG ID/CSI ID	HMDB ID	Formula	Monoisotopic mass (Da)	[M+H]+	[M-H]-	RT (min) Z-HILIC 24 min	RT (min) ZIC-pHILIC 24 min	Dry Weight (µg)	Solvent used	Plate ID	Well ID
1	2-Hydroxyisocaproate	C03264	HMDB0000624	C6H12O3	132.079	133.086	131.071	4.91	4.8	5	Water	1	A1
2	2-Hydroxyglutarate	C03196	HMDB0000694	C5H8O5	148.037	149.044	147.03	11.46	12.92	5	Water	1	A2
3	2,3-dihydroxybutanedioate	C00898	HMDB0059916	C4H6O6	150.016	151.024	149.009	12.08	14.07	5	Water	1	A3
4	2-Hydroxyphenylacetate	C05852	HMDB0062635	C8H8O3	152.047	153.055	151.04	4.89	5.41	5	95/5 water/methanol	1	A4
5	2-Methylbutyrylglycine	CSID168243	HMDB0000339	C7H13NO3	159.09	160.097	158.082	5.05	5.015	5	Water	1	A5
6	2-Hydroxyadipate	C02360	HMDB0000321	C6H10O5	162.053	163.06	161.046	11.21	12.5	5	Water	1	A6
7	3-(4-hydroxyphenyl)propanoate	C01744	HMDB0002199	C9H10O3	166.063	167.07	165.056	6.93	7.55	5	Water	1	A7
8	2-Octenedioate	CSID4800646	HMDB0000341	C8H12O4	172.074	173.081	171.066	10.6	11.335	5	Water	1	A8
9	2-Isopropylmalate	C02504	HMDB0000402	C7H12O5	176.068	177.076	175.061	9.76	10.705	5	Water	1	A9
10	Indole-3-butyrate	C11284	HMDB0002096	C12H13NO2	203.095	204.102	202.087	5.02	5.085	5	Water	1	A10
11	2-Methylcitrate	C02225	HMDB0000379	C7H10O7	206.043	207.05	205.035	12.52	6.86	5	Water	1	A11
12	Phytate	C01204	HMDB0003502	C6H18O24P6	659.861	660.869	658.854			5	95/5 water/methanol	1	A12
13	2-Oxobutyrate	C00109	HMDB0000005	C4H6O3	102.032	103.039	101.024			5	Water	1	B1
14	3-Hydroxybutyrate	C01089	HMDB0000011	C4H8O3	104.047	105.055	103.04	8.1	7.84	5	Water	1	B2
15	2-Oxoisocaproate	C00233	HMDB0000695	C6H10O3	130.063	131.07	129.056	3.72		5	Water	1	B3
16	Oxalacetate	C00036	HMDB0000223	C4H4O5	132.006	133.013	130.999	13.44		5	Water	1	B4
17	2-Oxoglutarate	C00026	HMDB0000208	C5H6O5	146.022	147.029	145.014	11.39	13.27	5	Water	1	B5
18	2-Oxoadipate	C00322	HMDB0000225	C6H8O5	160.037	161.044	159.03	11.04	12.71	5	Water	1	B6
19	3-Hydroxy-3-methylglutarate	C03761	HMDB0000355	C6H10O5	162.053	163.06	161.046	11.01	12.195	5	Water	1	B7
20	3-Hydroxymandelate	CSID78444	HMDB0000750	C8H8O4	168.042	169.049	167.035	8.21	9.8	5	Water	1	B8
21	1,2,3-Propanetricarboxylate	C19806	HMDB0031193	C6H8O6	176.032	177.039	175.025	12.93	14.5	5	Water	1	B9
22	3-(3-Hydroxyphenyl)-3-hydroxypropanoate	CSID93013	HMDB0002643	C9H10O4	182.058	183.065	181.051	7.45	8.5	5	Water	1	B10
23	Indole-3-propionate	CSID3613	HMDB0002302	C11H11NO2	189.079	190.086	188.072	5.89	5.34	5	Water	1	B11
24	3-(3-Methoxy-4hydroxyphenyl)lactate	CSID141152	HMDB0000913	C10H12O5	212.068	213.076	211.061	6.23	6.64	5	Water	1	B12
25	4-Aminobutyrate	C00334	HMDB0000112	C4H9NO2	103.063	104.071	102.056	13.57	12.785	5	Water	1	C1
26	2-Methyl-3-hydroxybutyrate	CSID141015	HMDB0000354	C5H10O3	118.063	119.07	117.056	4.76	4.47	5	Water	1	C2
27	3-Methylglutarate	CSID11781	HMDB0000752	C6H10O4	146.058	147.065	145.051	10.98	12.075	5	Water	1	C3
28	3-Hydroxyglutarate	CSID158277	HMDB0000428	C5H8O5	148.037	149.044	147.03	11.65	12.85	5	Water	1	C4
29	3-Methylphenylacetate	11623	HMDB0002222	C9H10O2	150.068	151.075	149.061		4.78	5	Water	1	C5
30	3-Methylcrotonylglycine	C20828	HMDB0000459	C7H11NO3	157.074	158.081	156.067	5.03	5.15	5	Water	1	C6
31	3-Methyladipate	CSID5367267	HMDB0000555	C7H12O4	160.074	161.081	159.066	10.71	11.6	5	Water	1	C7
32	3-Propylmalate	C04411	YMDB0000368	C7H12O5	176.068	177.076	175.061	10.09	11.3	5	Water	1	C8
33	3-Hydroxysuberate	CSID13498677	HMDB0000325	C8H14O5	190.084	191.091	189.077	10.61	11.65	5	Water	1	C9
34	Vanillylmandelate	C05584	HMDB0000291	C9H10O5	198.053	199.06	197.046	7.55	8.57	5	Water	1	C10
35	3-Hydroxydecanedioate	CSID2285525	HMDB0000350	C10H18O5	218.115	219.123	217.108	9.68	10.295	5	Water	1	C11
36	4-hydroxyhippurate	CSID2340857	HMDB6000026	C9H9NO4	195.053	196.06	194.046	8.55	9.29	5	Water	1	C12
37	Acetoacetate	C00164	HMDB0000060	C4H6O3	102.032	103.039	101.024	4.7		5	60/40 water/ethanol	1	D1
38	Alpha-aminobutyrate	C02356	HMDB0000452	C4H9NO2	103.063	104.071	102.056	12.39	11.87	5	Water	1	D2
39	Alpha-ketoisovalerate	C00141	HMDB0000019	C5H8O3	116.047	117.055	115.04	4.94	5.1	5	Water	1	D3
40	2-Hydroxyisovalerate	CSID90190	HMDB0000407	C5H10O3	118.063	119.07	117.056	5.01	5.1	5	Water	1	D4
41	5-Oxoproline	C01879	HMDB0000267	C5H7NO3	129.043	130.05	128.035	9.19	9.43	5	Water	1	D5
42	5-Aminolevulinate	C00430	HMDB0001149	C5H9NO3	131.058	132.066	130.051	11.73	11.31	5	95/5 water/methanol	1	D6
43	5-Hydroxypipecolate	CSID133730	HMDB0029426	C6H11NO3	145.074	146.081	144.067	12.77	12.19	5	Water	1	D7
44	4-Hydroxyphenylacetate	C00642	HMDB0000020	C8H8O3	152.047	153.055	151.04	8.94	9.41	5	Water	1	D8
45	Allantoin	C01551	HMDB0000462	C4H6N4O3	158.044	159.051	157.037	12.04	12.53	5	95/5 water/methanol	1	D9
46	4-Pyridoxolactone	C00971	HMDB0003454	C8H7NO3	165.043	166.05	164.035	6.52	5.22	5	Water	1	D10
47	Aconitate	C00417	HMDB0000072	C6H6O6	174.016	175.024	173.009	12.66	14.42	5	Water	1	D11
48	Xanthurenate	C02470	HMDB0000881	C10H7NO4	205.038	206.045	204.03	8.51	10.38	5	95/5 water/methanol	1	D12
49	Fumarate	C00122	HMDB0000134	C4H4O4	116.011	117.018	115.004	11.94	13.62	5	95/5 water/methanol	1	E1
50	Benzoate	C00180	HMDB0001870	C7H6O2	122.037	123.044	121.029	4.89	5.25	5	95/5 water/methanol	1	E2
51	Citraconate	C02226	HMDB0000634	C5H6O4	130.027	131.034	129.019	6.42	8.99	5	Water	1	E3
52	Glutarate	C00489	HMDB0000661	C5H8O4	132.042	133.05	131.035	11.25	12.54	5	95/5 water/methanol	1	E4
53	Adipate	C06104	HMDB0000448	C6H10O4	146.058	147.065	145.051	11	12.11	5	60/40 water/ethanol	1	E5
54	Furan-2,5-dicarboxylate	C20450	HMDB0004812	C6H4O5	156.006	157.013	154.999	11.89	13.68	5	Water	1	E6
55	4,5-Dihydroorotate	C00337	HMDB0003349	C5H6N2O4	158.033	159.04	157.026	9.21	10.25	5	Water	1	E7
56	Ascorbate	C00072	HMDB0000044	C6H8O6	176.032	177.039	175.025	11.03		5	Water	1	E8
57	Hippurate	C01586	HMDB0000714	C9H9NO3	179.058	180.066	178.051	5.66	5.19	5	95/5 water/methanol	1	E9
58	Citrate	C00158	HMDB0000094	C6H8O7	192.027	193.034	191.02	13.08		5	95/5 water/methanol	1	E10
59	Cinnamoylglycine-trans	CSID618829	HMDB0011621	C11H11NO3	205.074	206.081	204.067	4.96	4.775	5	Water	1	E11
60	Argininosuccinate	C03406	HMDB0000052	C10H18N4O6	290.123	291.13	289.115	12.85	13.18	5	Water	1	E12
61	Maleate	C01384	HMDB0000176	C4H4O4	116.011	117.018	115.004	6.39	9.48	5	95/5 water/methanol	1	F1
62	Indole-3-aldehyde	C08493	HMDB0029737	C9H7NO	145.053	146.06	144.046	4.6	5.13	5	Water	1	F2
63	Indole-3-carboxylate	C19837	HMDB0003320	C9H7NO2	161.048	162.055	160.04	8.27	8.885	5	Water	1	F3
64	Homogentisate	C00544	HMDB0000130	C8H8O4	168.042	169.05	167.035	6.99	9.09	5	60/40 water/ethanol	1	F4
65	Gallate	C01424	HMDB0005807	C7H6O5	170.022	171.029	169.014	4		5	Water	1	F5
66	Indole-3-Acetate	C00954	HMDB0000197	C10H9NO2	175.063	176.071	174.056	7.68	8.13	5	95/5 water/methanol	1	F6
67	Indoleacrylate	C21283	HMDB0000734	C11H9NO2	187.063	188.071	186.056	6.56	6.26	5	Water	1	F7
68	Kynurenate	C01717	HMDB0000715	C10H7NO3	189.043	190.05	188.035	4.9	5.245	5	95/5 water/methanol	1	F8
69	Isocitrate	C00311	HMDB0000193	C6H8O7	192.027	193.034	191.02	13.11	14.84	5	95/5 water/methanol	1	F9
70	Indole-3-Pyruvate	C00331	HMDB0060484	C11H9NO3	203.058	204.066	202.051	4.87	6.465	5	95/5 water/methanol	1	F10
71	Indolelactate	C02043	HMDB0000671	C11H11NO3	205.074	206.081	204.067	6	6.88	5	Water	1	F11
72	Prephenate	C00254	HMDB0012283	C10H10O6	226.048	227.055	225.04	11.87		5	Water	1	F12
73	Methylmalonate	C02170	HMDB0000202	C4H6O4	118.027	119.034	117.019	10.82	12.49	5	95/5 water/methanol	1	G1
74	Pipecolate	C00408	HMDB0000716	C6H11NO2	129.079	130.086	128.072	11.83	11.135	5	95/5 water/methanol	1	G2
75	Mevalonolactone	CSID4483406	HMDB0006024	C6H10O3	130.063	131.07	129.056	5.05	5.13	5	Water	1	G3
76	Malate	C00149	HMDB0031518	C4H6O5	134.022	135.029	133.014	11.85	13.45	5	95/5 water/methanol	1	G4
77	Phenylacetate	C07086	HMDB0000209	C8H8O2	136.052	137.06	135.045		5.11	5	Water	1	G5
78	Mevalonate	C00418	HMDB0000227	C6H12O4	148.074	149.081	147.066	7.47	7.72	5	60/40 water/ethanol	1	G6
79	Orotate	C00295	HMDB0000226	C5H4N2O4	156.017	157.024	155.01	7.2	9.73	5	95/5 water/methanol	1	G7
80	Phenylpyruvate	C00166	HMDB0000205	C9H8O3	164.047	165.055	163.04	4.46	4.64	5	Water	1	G8
81	Phenyllactate	C05607	HMDB0000563	C9H10O3	166.063	167.07	165.056	4.88	4.95	5	Water	1	G9
82	N-Acetylaspartate	C01042	HMDB0000812	C6H9NO5	175.048	176.055	174.041	10.99	12.47	5	95/5 water/methanol	1	G10
83	Quinate	C00296	HMDB0003072	C7H12O6	192.063	193.071	191.056	10.19	11.13	5	95/5 water/methanol	1	G11
84	N-acetyl-tyrosine	C01657	HMDB0000866	C11H13NO4	223.084	224.092	222.077	6.45	6.34	5	Water	1	G12
85	3-hydroxyisobutyrate	C01188	HMDB0000023	C4H8O3	104.047	105.055	103.04	8.6	8.95	5	Water	1	H1
86	Succinate	C00042	HMDB0000254	C4H6O4	118.027	119.034	117.019	11.39	12.91	5	95/5 water/methanol	1	H2
87	Glutaconate	C02214	HMDB0000620	C5H6O4	130.027	131.034	129.019			5	Water	1	H3
88	2-Hydroxy-3-methylvalerate	CSID8972081	HMDB0000317	C6H12O3	132.079	133.086	131.071	4.91	3.9	5	Water	1	H4
89	Urocanate	C00785	HMDB0000301	C6H6N2O2	138.043	139.05	137.036	10.19	10.26	5	95/5 water/methanol	1	H5
90	3-Hydroxyadipic 3,6 lactone	CSID 168429	HMDB0029171	C6H8O4	144.042	145.049	143.035		12.55	5	Water	1	H6
91	Tiglylglycine	CSID4945715	HMDB0000959	C7H11NO3	157.074	158.081	156.067	5.05	5.11	5	Water	1	H7
92	Succinylacetone	CSID5121	HMDB0000635	C7H10O4	158.058	159.065	157.051	5.06	5.125	5	Water	1	H8
93	3-Hydroxyadipate	CSID133894	HMDB0000345	C6H10O5	162.053	163.06	161.046	11.31	12.56	5	Water	1	H9
94	Quinolinate	C03722	HMDB0000232	C7H5NO4	167.022	168.029	166.015	11.69	13.03	5	95/5 water/methanol	1	H10
95	4-Hydroxyphenylpyruvate	C01179	HMDB0000707	C9H8O4	180.042	181.049	179.035	11.48	4.24	5	Water	1	H11
96	4-Hydroxyphenyllactate	C03672	HMDB0000755	C9H10O4	182.058	183.065	181.051	7.04	8.44	5	Water	1	H12
97	N-Methyl-L-alanine	C02721	HMDB0094692	C4H9NO2	103.063	104.071	102.056	12.24	11.53	5	95/5 water/methanol	2	A1
98	Beta-NAD	C00003	HMDB0000902	C21H27N7O14P2	663.109	664.116	662.102	11.53		5	95/5 water/methanol	2	A2
99	Glutamine	C00064	HMDB0000641	C5H10N2O3	146.069	147.076	145.062	12.85	12.605	5	95/5 water/methanol	2	A3
100	Hypotaurine	C00519	HMDB0000965	C2H7NO2S	109.02	110.027	108.012	13.06	12.705	5	95/5 water/methanol	2	A4
101	Citrate	C00158	HMDB0000094	C6H8O7	192.027	193.034	191.02	13.14	14.43	5	Water	2	A5
102	Threonine	C00188	HMDB0000167	C4H9NO3	119.058	120.066	118.051	12.47	12.275	5	95/5 water/methanol	2	A6
103	Purine	C15587	HMDB0001366	C5H4N4	120.044	121.051	119.036	8.3	7.32	5	95/5 water/methanol	2	A7
104	N-Acetylneuraminic acid	C19910	HMDB0000230	C11H19NO9	309.106	310.113	308.099	10.85	11.465	5	95/5 water/methanol	2	A8
105	N-Acetyl-mannosamine	C00645	HMDB0001129	C8H15NO6	221.09	222.097	220.083	11.32	10.92	5	95/5 water/methanol	2	A9
106	Pyrimidine	C00396	HMDB0003361	C4H4N2	80.0374	81.0447	79.0301			5	95/5 water/methanol	2	A10
107	trans-Aconitate	C02341	HMDB0000958	C6H6O6	174.016	175.024	173.009	12.43	14.45	5	95/5 water/methanol	2	A11
108	Urate	C00366	HMDB0000289	C5H4N4O3	168.028	169.036	167.021	10.24	11.365	5	95/5 water/methanol	2	A12
109	Cytidine	C00475	HMDB0000089	C9H13N3O5	243.086	244.093	242.078	11.14	11.015	5	95/5 water/methanol	2	B1
110	L-Serine	C00065	HMDB0000187	C3H7NO3	105.043	106.05	104.035	13.21	13.09	5	95/5 water/methanol	2	B2
111	L-Cysteine	C00097	HMDB0000574	C3H7NO2S	121.02	122.027	120.012	12.68		5	95/5 water/methanol	2	B3
112	L-Citrulline	C00327	HMDB0000904	C6H13N3O3	175.096	176.103	174.088	13.38	13	5	95/5 water/methanol	2	B4
113	Taurine	C00245	HMDB0000251	C2H7NO3S	125.015	126.022	124.007	12.56	12.8	5	95/5 water/methanol	2	B5
114	N-Acetyl-tryptophan	CSID388950	HMDB0013713	C13H14N2O3	246.1	247.108	245.093	4.9	5.275	5	95/5 water/methanol	2	B6
115	Nicotinate	C00253	HMDB0001488	C6H5NO2	123.032	124.039	122.025	7.11	6.54	5	95/5 water/methanol	2	B7
116	Inosine	C00294	HMDB0000195	C10H12N4O5	268.081	269.088	267.073	10.29	10.33	5	95/5 water/methanol	2	B8
117	Gamma-Aminobutyrate	C00334	HMDB0000112	C4H9NO2	103.063	104.071	102.056	13.5	12.82	5	95/5 water/methanol	2	B9
118	Cytosine	C00380	HMDB0000630	C4H5N3O	111.043	112.051	110.036	10.61	10.61	5	95/5 water/methanol	2	B10
119	L-Isoleucine	C00407	HMDB0000172	C6H13NO2	131.095	132.102	130.087	10.76	10.33	5	95/5 water/methanol	2	B11
120	5,6-Dihydroxyindole	C05578	HMDB0004058	C8H7NO2	149.048	150.055	148.04			5	95/5 water/methanol	2	B12
121	Glutamate	C00025	HMDB0000148	C5H9NO4	147.053	148.06	146.046	11.66	12.265	5	95/5 water/methanol	2	C1
122	Ascorbate	C00072	HMDB0000044	C6H8O6	176.032	177.039	175.025	11		5	95/5 water/methanol	2	C2
123	4-Hydroxyphenylacetate	C00642	HMDB0000020	C8H8O3	152.047	153.055	151.04	8.72	9.49	5	95/5 water/methanol	2	C3
124	N-Acetylglucosamine	C00140	HMDB0000215	C8H15NO6	221.09	222.097	220.083	11.2	10.8	5	95/5 water/methanol	2	C4
125	Glycolate	C00160	HMDB0000115	C2H4O3	76.016	77.0233	75.0087	6.08	6.14	5	95/5 water/methanol	2	C5
126	Sarcosine	C00213	HMDB0000271	C3H7NO2	89.0477	90.055	88.0404	12.68	12.135	5	95/5 water/methanol	2	C6
127	Creatinine	C00791	HMDB0000562	C4H7N3O	113.059	114.066	112.052	9.7	9.245	5	95/5 water/methanol	2	C7
128	Quinate	C00296	HMDB0003072	C7H12O6	192.063	193.071	191.056	10.33	11.03	5	Water	2	C8
129	Dihydroorotate	C00337	HMDB0003349	C5H6N2O4	158.033	159.04	157.025	9.11	10.41	5	95/5 water/methanol	2	C9
130	dUMP	C00365	HMDB0001409	C9H13N2O8P	308.041	309.048	307.034	10.76	11.745	5	95/5 water/methanol	2	C10
131	Guanidinoacetate	C00581	HMDB0000128	C3H7N3O2	117.054	118.061	116.047	13.58	13.255	5	95/5 water/methanol	2	C11
132	Deoxyribose-5-Phosphate	C00673	HMDB0001031	C5H11O7P	214.024	215.032	213.017	11.34	12.27	5	95/5 water/methanol	2	C12
133	Glycine	C00037	HMDB0000123	C2H5NO2	75.032	76.0393	74.0247	13.33	13.11	5	95/5 water/methanol	2	D1
134	Methionine	C00073	HMDB0000696	C5H11NO2S	149.051	150.058	148.044	10.87	10.565	5	95/5 water/methanol	2	D2
135	Tetrahydrofolate	C00101	HMDB0001846	C19H23N7O6	445.171	446.178	444.164			5	95/5 water/methanol	2	D3
136	2-Phosphoglycerate	C00631	HMDB0000362	C3H7O7P	185.993	187	184.986	12.55	13.81	5	95/5 water/methanol	2	D4
137	Methylthioadenosine	C00170	HMDB0001173	C11H15N5O3S	297.09	298.097	296.082	6.16	5.815	5	95/5 water/methanol	2	D5
138	Thymidine	C00214	HMDB0000273	C10H14N2O5	242.09	243.098	241.083	6.61	6.465	5	95/5 water/methanol	2	D6
139	Cys-Gly	C01419	HMDB0000078	C5H10N2O3S	178.041	179.049	177.034	10.71	11.77	5	95/5 water/methanol	2	D7
140	Aminoisobutanoate	C05145	HMDB0003911	C4H9NO2	103.063	104.071	102.056	12.65	12.105	5	95/5 water/methanol	2	D8
141	Gulose	C15923	HMDB0012326	C6H12O6	180.063	181.071	179.056	12.37	12.38	5	95/5 water/methanol	2	D9
142	Xanthine	C00385	HMDB0000292	C5H4N4O2	152.033	153.041	151.026	9.81	10.68	5	95/5 water/methanol	2	D10
143	N-Glycolylneuraminate	C03410	HMDB0000833	C11H19NO10	325.101	326.108	324.094	11.29	12.185	5	95/5 water/methanol	2	D11
144	Cystine	C00491	HMDB0000192	C6H12N2O4S2	240.024	241.031	239.017	12.69	13.065	5	95/5 water/methanol	2	D12
145	L-Alanine	C00041	HMDB0000161	C3H7NO2	89.0477	90.055	88.0404	12.89	12.54	5	95/5 water/methanol	2	E1
146	Diethanolamine	C06772	HMDB0004437	C4H11NO2	105.079	106.086	104.072	15.92	16.42	5	95/5 water/methanol	2	E2
147	UMP	C00105	HMDB0000288	C9H13N2O9P	324.036	325.043	323.029	11.32	12.48	5	95/5 water/methanol	2	E3
148	L-Proline	C00148	HMDB0000162	C5H9NO2	115.063	116.071	114.056	12.18	11.35	5	95/5 water/methanol	2	E4
149	Thymine	C00178	HMDB0000262	C5H6N2O2	126.043	127.05	125.036	6.33	6.835	5	95/5 water/methanol	2	E5
150	Gamma-Caprolactone	CSID12232	HMDB0003843	C6H10O2	114.068	115.075	113.061			5	95/5 water/methanol	2	E6
151	dTDP	C00363	HMDB0001274	C10H16N2O11P2	402.023	403.03	401.016	11.64		5	95/5 water/methanol	2	E7
152	Uridine	C00299	HMDB0000296	C9H12N2O6	244.07	245.077	243.062	9.39	9.57	5	95/5 water/methanol	2	E8
153	dTTP	C00459	HMDB0001342	C10H17N2O14P3	481.989	482.997	480.982	12.35		5	95/5 water/methanol	2	E9
154	Carnosine	C00386	HMDB0000033	C9H14N4O3	226.107	227.114	225.099	13.66	12.815	5	95/5 water/methanol	2	E10
155	Niacinamide	C00153	HMDB0001406	C6H6N2O	122.048	123.055	121.041	6.25	6.44	5	95/5 water/methanol	2	E11
156	Shikimate	C00493	HMDB0003070	C7H10O5	174.053	175.06	173.046	11.25	12.1	5	95/5 water/methanol	2	E12
157	Succinate	C00042	HMDB0000254	C4H6O4	118.027	119.034	117.019	11.53	12.87	5	Water	2	F1
158	Phenylalanine	C00079	HMDB0000159	C9H11NO2	165.079	166.086	164.072	9.82	9.49	5	95/5 water/methanol	2	F2
159	Uracil	C00106	HMDB0000300	C4H4N2O2	112.027	113.035	111.02	7.57	8.16	5	95/5 water/methanol	2	F3
160	Aspartylglycosamine	C04540	HMDB0000489	C12H21N3O8	335.133	336.14	334.126	12.9	12.705	5	95/5 water/methanol	2	F4
161	Aspartate	C00049	HMDB0000191	C4H7NO4	133.038	134.045	132.03	11.79	12.59	5	95/5 water/methanol	2	F5
162	dCMP	C00239	HMDB0001202	C9H14N3O7P	307.057	308.064	306.05	11.57	12.21	5	95/5 water/methanol	2	F6
163	Hypoxanthine	C00262	HMDB0000157	C5H4N4O	136.039	137.046	135.031	9.64	9.805	5	95/5 water/methanol	2	F7
164	Creatine	C00300	HMDB0000064	C4H9N3O2	131.069	132.077	130.062	13.01	12.465	5	95/5 water/methanol	2	F8
165	L-Dopa	C00355	HMDB0000181	C9H11NO4	197.069	198.076	196.062	14.53		5	95/5 water/methanol	2	F9
166	Guanosine	C00387	HMDB0000133	C10H13N5O5	283.092	284.099	282.084	11.5	11.555	5	95/5 water/methanol	2	F10
167	Dihydrouracil	C00429	HMDB0000076	C4H6N2O2	114.043	115.05	113.036	6.74	7.04	5	95/5 water/methanol	2	F11
168	Malate	C00149	HMDB0000156	C4H6O5	134.022	135.029	133.014	12.03	13.37	5	Water	2	F12
169	Isocitrate	C00311	HMDB0001874	C6H8O7	192.027	193.034	191.02	13.2	14.86	5	Water	2	G1
170	Tyrosine	C00082	HMDB0000158	C9H11NO3	181.074	182.081	180.067	11.81	11.66	5	95/5 water/methanol	2	G2
171	2-Piperidinone	CSID12144	HMDB0011749	C5H9NO	99.0684	100.076	98.0611	5.78		5	95/5 water/methanol	2	G3
172	Asparagine	C00152	HMDB0000168	C4H8N2O3	132.053	133.061	131.046	12.81	12.71	5	95/5 water/methanol	2	G4
173	L-Valine	C00183	HMDB0000883	C5H11NO2	117.079	118.086	116.072	11.58	11.16	5	95/5 water/methanol	2	G5
174	Guanine	C00242	HMDB0000132	C5H5N5O	151.049	152.057	150.042	11.17	11.46	5	95/5 water/methanol	2	G6
175	L-Homoserine	C00263	HMDB0000719	C4H9NO3	119.058	120.066	118.051	12.91	12.56	5	95/5 water/methanol	2	G7
176	Pyridoxine	C00314	HMDB0000239	C8H11NO3	169.074	170.081	168.067	8.24	7.055	5	95/5 water/methanol	2	G8
177	dAMP	C00360	HMDB0000905	C10H14N5O6P	331.068	332.075	330.061	10.65	11.055	5	95/5 water/methanol	2	G9
178	Folate	C00504	HMDB0000121	C19H19N7O6	441.14	442.147	440.132	12.06		5	95/5 water/methanol	2	G10
179	Nicotinamide Mononucleotide	C00455	-	C11H15N2O8P	334.057	335.064	333.049	12.44	12.56	5	95/5 water/methanol	2	G11
180	3-Methyl-L-Histidine	C01152	HMDB0000479	C7H11N3O2	169.085	170.092	168.078	12.43	11.175	5	95/5 water/methanol	2	G12
181	Diaminopimelate	C00666	HMDB0001370	C7H14N2O4	190.095	191.103	189.088	14.12	14.055	5	95/5 water/methanol	3	A1
182	Aminoadipate	C00956	HMDB0000510	C6H11NO4	161.069	162.076	160.062	11.85	12.345	5	95/5 water/methanol	3	A2
183	Deoxycytidine	C00881	HMDB0000014	C9H13N3O4	227.091	228.098	226.083	10.27	9.97	5	95/5 water/methanol	3	A3
184	Noradrenaline	C00547	HMDB0000216	C8H11NO3	169.074	170.081	168.067			5	95/5 water/methanol	3	A4
185	Glucosamine-6-Phosphate	C00352	HMDB0001254	C6H14NO8P	259.046	260.053	258.038	12.44	13.32	5	95/5 water/methanol	3	A5
186	Tartrate	C02107	HMDB0029878	C4H6O6	150.016	151.024	149.009	11.84	14.1	5	95/5 water/methanol	3	A6
187	3-Dehydroshikimate	C02637	YMDB0000390	C7H8O5	172.037	173.044	171.03	9.52	10.92	5	95/5 water/methanol	3	A7
188	Caffeine	C07481	HMDB0001847	C8H10N4O2	194.08	195.088	193.073	4.71	5.02	5	95/5 water/methanol	3	A8
189	Homocysteine	C00155	HMDB0000742	C4H9NO2S	135.035	136.043	134.028	13.14	13.075	5	95/5 water/methanol	3	A9
190	Theophylline	C07130	HMDB0001889	C7H8N4O2	180.065	181.072	179.057	5.21	5.375	5	95/5 water/methanol	3	A10
191	Leucine	C00123	HMDB0000687	C6H13NO2	131.095	132.102	130.087	10.42	10.06	5	95/5 water/methanol	3	A11
192	Trehalose	C01083	HMDB0000975	C12H22O11	342.116	343.124	341.109	13.23	13.1	5	95/5 water/methanol	3	A12
193	Betaine	C00719	HMDB0000043	C5H11NO2	117.079	118.086	116.072	11.45	10.285	5	95/5 water/methanol	3	B1
194	D-Tryptophan	C00525	HMDB0013609	C11H12N2O2	204.09	205.097	203.083	10.91	10.87	5	95/5 water/methanol	3	B2
195	3-Sulfinoalanine	C00606	HMDB0000996	C3H7NO4S	153.01	154.017	152.002	11.38	12.31	5	95/5 water/methanol	3	B3
196	O-Succinyl-L-homoserine	C01118	YMDB0000917	C8H13NO6	219.074	220.082	218.067	10.98	11.455	5	95/5 water/methanol	3	B4
197	Allantoin	C01551	HMDB0000462	C4H6N4O3	158.044	159.051	157.037	12.09	12.505	5	Water	3	B5
198	Glyceraldehyde	C02154	HMDB0001051	C3H6O3	90.0317	91.039	89.0244			5	95/5 water/methanol	3	B6
199	Glucuronolactone	C02670	HMDB0006355	C6H8O6	176.032	177.039	175.025	9.75	10.37	5	95/5 water/methanol	3	B7
200	(2-Aminoethyl)Phosphonate	C03557	HMDB0011747	C2H8NO3P	125.024	126.031	124.017	13.13	13.64	5	95/5 water/methanol	3	B8
201	2,5-Dihydrobenzoate	C00628	HMDB0000152	C7H6O4	154.027	155.034	153.019	6.01	8.03	5	95/5 water/methanol	3	B9
202	N-Acetyl-Glucosamine 1-Phosphate	C04501	HMDB0001367	C8H16NO9P	301.056	302.064	300.049	11.76	12.49	5	95/5 water/methanol	3	B10
203	Threitol	C16884	HMDB0004136	C4H10O4	122.058	123.065	121.051	10.92	10.815	5	95/5 water/methanol	3	B11
204	Glucosamine	C00329	HMDB0001514	C6H13NO5	179.079	180.087	178.072	12.8	12.57	5	95/5 water/methanol	3	B12
205	Paraxanthine	C13747	HMDB0001860	C7H8N4O2	180.065	181.072	179.057	5.16	5.55	5	95/5 water/methanol	3	C1
206	ADP	C00008	HMDB0001341	C10H15N5O10P2	427.029	428.037	426.022	11.97		5	95/5 water/methanol	3	C2
207	2-Deoxy-D-Glucose	CSID97292	HMDB0062477	C6H12O5	164.068	165.076	163.061	12.28	12.155	5	95/5 water/methanol	3	C3
208	1-Methyl-L-Histidine	C01152	HMDB0000001	C7H11N3O2	169.085	170.092	168.078	12.41	11.2	5	95/5 water/methanol	3	C4
209	Galactitol	C01697	HMDB0000107	C6H14O6	182.079	183.086	181.072	12.3	12.155	5	95/5 water/methanol	3	C5
210	Oxoproline	C01879	HMDB0000267	C5H7NO3	129.043	130.05	128.035	9.12	9.55	5	95/5 water/methanol	3	C6
211	4-Pyridoxate	C00847	HMDB0000017	C8H9NO4	183.053	184.06	182.046	4.43	4.575	5	95/5 water/methanol	3	C7
212	Quinolinate	C03722	HMDB0000232	C7H5NO4	167.022	168.029	166.015	11.74	13.01	5	Water	3	C8
213	Methylguanidine	C02294	HMDB0001522	C2H7N3	73.064	74.0713	72.0567	21.45		5	95/5 water/methanol	3	C9
214	dGMP	C00362	HMDB0001044	C10H14N5O7P	347.063	348.07	346.056	11.99	11.64	5	95/5 water/methanol	3	C10
215	Succinate anhydride	C19524	HMDB0032523	C4H4O3	100.016	101.023	99.0087	11.4	12.91	5	95/5 water/methanol	3	C11
216	Glucuronate	C00191	HMDB0000127	C6H10O7	194.043	195.05	193.035	11.99	13.25	5	95/5 water/methanol	3	C12
217	1-Methyladenosine	C02494	HMDB0003331	C11H15N5O4	281.112	282.12	280.105	12.51	13.465	5	95/5 water/methanol	3	D1
218	Deoxyuridine	C00526	HMDB0000012	C9H12N2O5	228.075	229.082	227.067	7.68	7.62	5	95/5 water/methanol	3	D2
219	Gluconate	C00257	HMDB0000625	C6H12O7	196.058	197.066	195.051	11.01	12.08	5	95/5 water/methanol	3	D3
220	Urocanate	C00785	HMDB0000301	C6H6N2O2	138.043	139.05	137.036	10.31	10.15	5	Water	3	D4
221	Kynurenine	C00328	HMDB0000684	C10H12N2O3	208.085	209.092	207.077	10.39	10.2	5	95/5 water/methanol	3	D5
222	Pyroglutamate	C01879	HMDB0000267	C5H7NO3	129.043	130.05	128.035	9.15	9.56	5	95/5 water/methanol	3	D6
223	4-Acetamidobutanoate	C02946	HMDB0003681	C6H11NO3	145.074	146.081	144.067	8.71	8.04	5	95/5 water/methanol	3	D7
224	Trehalose-6-Phosphate	C00689	HMDB0001124	C12H23O14P	422.083	423.09	421.075	12.54		5	95/5 water/methanol	3	D8
225	Melanin	C05606	HMDB0004068	C18H10N2O4	318.064	319.071	317.057	14.64		5	95/5 water/methanol	3	D9
226	Dopamine	C03758	HMDB0000073	C8H11NO2	153.079	154.086	152.072			5	95/5 water/methanol	3	D10
227	AMP	C00020	HMDB0000045	C10H14N5O7P	347.063	348.07	346.056	10.96	11.635	5	95/5 water/methanol	3	D11
228	L-Lysine	C00047	HMDB0000182	C6H14N2O2	146.106	147.113	145.098	19.19	18.355	5	95/5 water/methanol	3	D12
229	Citicoline	C00307	HMDB0001413	C14H27N4O11P2	489.115	490.122	488.108	12.18		5	95/5 water/methanol	3	E1
230	1,3-Diaminopropane	C00986	HMDB0000002	C3H10N2	74.0844	75.0917	73.0771			5	95/5 water/methanol	3	E2
231	Phosphoserine	C01005	HMDB0000272	C3H8NO6P	185.009	186.016	184.002	12.25	13.38	5	95/5 water/methanol	3	E3
232	1-Aminocyclopropanecarboxylate	C01234	HMDB0036458	C4H7NO2	101.048	102.055	100.04	11.73	11.24	5	95/5 water/methanol	3	E4
233	Glutaryl-L-carnitine	CID53252330	HMDB0013130	C12H21NO6	276.144	277.151	275.137	11.2	10.85	5	95/5 water/methanol	3	E5
234	L-Cystathionine	C02291	HMDB0000099	C7H14N2O4S	222.067	223.075	221.06	13.38	13.445	5	95/5 water/methanol	3	E6
235	L-Norvaline	C01799	HMDB0013716	C5H11NO2	117.079	118.086	116.072	11.33	10.87	5	95/5 water/methanol	3	E7
236	3-Hydroxymethylglutarate	C03761	HMDB0000355	C6H10O5	162.053	163.06	161.046	10.81	12.225	5	95/5 water/methanol	3	E8
237	Phosphonoacetate	C05682	HMDB0004110	C2H5O5P	139.987	140.995	138.98	12.92	14.21	5	95/5 water/methanol	3	E9
238	2-Picolinate	C10164	HMDB0002243	C6H5NO2	123.032	124.039	122.025	9.19		5	95/5 water/methanol	3	E10
239	Bovinocidin	C05669	HMDB0034259	C3H5NO4	119.022	120.029	118.015	6.31	6.97	5	95/5 water/methanol	3	E11
240	L-Arginine	C00062	HMDB0000517	C6H14N4O2	174.112	175.119	173.104	19.78	19.55	5	95/5 water/methanol	3	E12
241	Trans-4-Hydroxy-L-Proline	C01157	HMDB0006055	C5H9NO3	131.058	132.066	130.051	12.75	12.37	5	95/5 water/methanol	3	F1
242	Fucose	C01019	HMDB0000174	C6H12O5	164.068	165.076	163.061	7.02		5	95/5 water/methanol	3	F2
243	L-Homocystine	C01817	HMDB0000575	C8H16N2O4S2	268.055	269.062	267.048	13.14	13.115	5	95/5 water/methanol	3	F3
244	N-Methylglutamate	C01046	HMDB0062660	C6H11NO4	161.069	162.076	160.062	10.76	11.05	5	95/5 water/methanol	3	F4
245	D-Ornithine	C00515	HMDB0003374	C5H12N2O2	132.09	133.097	131.083	17.94	17.42	5	95/5 water/methanol	3	F5
246	Xanthosine	C01762	HMDB0000299	C10H12N4O6	284.076	285.083	283.068	10.04	11.125	5	95/5 water/methanol	3	F6
247	Glucosamine 1-Phosphate	C06156	HMDB0001109	C6H14NO8P	259.046	260.053	258.038	12.43	13.305	5	95/5 water/methanol	3	F7
248	Thyrotropin Releasing Hormone	C03958	HMDB0060080	C16H22N6O4	362.17	363.178	361.163	9.9	8.29	5	95/5 water/methanol	3	F8
249	Cysteate	C00506	HMDB0002757	C3H7NO5S	169.004	170.012	167.997	11.52	13.205	5	95/5 water/methanol	3	F9
250	N-Methylaspartate	C12269	HMDB0002393	C5H9NO4	147.053	148.06	146.046	10.92	11.41	5	95/5 water/methanol	3	F10
251	Galactarate	C00879	HMDB0000639	C6H10O8	210.038	211.045	209.03	11.97	13.99	5	95/5 water/methanol	3	F11
252	Alpha-Hydroxyisobutyrate	C21297	HMDB0000729	C4H8O3	104.047	105.055	103.04			5	95/5 water/methanol	3	F12
253	NAADP	C13051	-	C21H27N6O18P3	744.059	745.067	743.052	12.78		5	95/5 water/methanol	3	G1
254	N-Acetylasparagine	CSID15903808	HMDB0006028	C6H10N2O4	174.064	175.071	173.057	9.6	10.27	5	95/5 water/methanol	3	G2
255	Pipecolate	C00408	HMDB0000070	C6H11NO2	129.079	130.086	128.072	11.91	11.1	5	Water	3	G3
256	Glucose 6-Phosphate	C00092	HMDB0001401	C6H13O9P	260.03	261.037	259.022	12.46	13.555	5	95/5 water/methanol	3	G4
257	NADP	C00006	HMDB0000217	C21H28N7O17P3	743.075	744.083	742.068	12.35		5	95/5 water/methanol	3	G5
258	6-Phosphogluconate	C00345	HMDB0001316	C6H13O10P	276.025	277.032	275.017	12.69		5	95/5 water/methanol	3	G6
259	1-Methyl-Hydantoin	C02565	HMDB0003646	C4H6N2O2	114.043	115.05	113.036	5.54		5	95/5 water/methanol	3	G7
260	Guanosine Triphosphate	C00044	HMDB0001273	C10H16N5O14P3	522.991	523.998	521.983	13.62		5	95/5 water/methanol	3	G8
261	Trimethylamine N-Oxide	C01104	HMDB0000925	C3H9NO	75.0684	76.0757	74.0611	12.8	9.97	5	95/5 water/methanol	3	G9
262	Agmatine Sulfate	CSID2073875	-	C5H16N4O4S	228.089	229.097	227.082	3.99		5	95/5 water/methanol	3	G10
263	Glycolaldehyde Dimer	CSID161748	-	C4H8O4	120.042	121.05	119.035			5	95/5 water/methanol	3	G11
264	dGTP	C00286	HMDB0001440	C10H16N5O13P3	506.996	508.003	505.988	13.34		5	95/5 water/methanol	3	G12
265	N-Acetylglycine	CSID10507	HMDB0000532	C4H7NO3	117.043	118.05	116.035	8.98	9.31	5	95/5 water/methanol	3	H1
266	N-acetylaspartate	C01042	HMDB0000812	C6H9NO5	175.048	176.055	174.041	11.12	12.455	5	Water	3	H2
267	IDP	C00104	HMDB0003335	C10H14N4O11P2	428.013	429.021	427.006	12.63		5	95/5 water/methanol	3	H3
268	Palmitoylcarnitine	C02990	HMDB0000222	C23H46NO4	400.342	401.349	399.335	4.49		5	95/5 water/methanol	3	H4
269	Norspermidine	C03375	HMDB0011634	C6H17N3	131.142	132.15	130.135	4.41		5	95/5 water/methanol	3	H5
270	Nicotinamide Hypoxanthine Dinucleotide	C04423	-	C21H26N6O15P2	664.093	665.1	663.086	11.95		5	95/5 water/methanol	3	H6
271	S-Adenosylmethionine	C00019	HMDB0001185	C15H23N6O5S	399.145	400.152	398.138	14.04		5	95/5 water/methanol	3	H7
272	Erythritol	C00503	HMDB0002994	C4H10O4	122.058	123.065	121.051	10.91	10.805	5	95/5 water/methanol	3	H8
273	Glucosaminate	C03752	-	C6H13NO6	195.074	196.082	194.067	13.62	13.64	5	95/5 water/methanol	3	H9
274	UTP	C00075	HMDB0000285	C9H15N2O15P3	483.969	484.976	482.961	12.86		5	95/5 water/methanol	3	H10
275	2-Keto-3-deoxy-6-phosphogluconate	C04442	HMDB0001376	C6H11O9P	258.014	259.021	257.007	12.53	13.965	5	95/5 water/methanol	3	H11
276	Oxoadipate	C00322	HMDB0000225	C6H8O5	160.037	161.044	159.03	10.81	12.71	5	60/40 water/ethanol	3	H12
277	Putrescine	C00134	HMDB0001414	C4H12N2	88.1	89.1073	87.0927			5	95/5 water/methanol	4	A1
278	Deoxycarnitine	C01181	HMDB0001161	C7H15NO2	145.11	146.118	144.103	13.12	11.45	5	95/5 water/methanol	4	A2
279	2',3'-cAMP	C02353	HMDB0011616	C10H12N5O6P	329.053	330.06	328.045	8.02	8.18	5	95/5 water/methanol	4	A3
280	Mevalolactone	CSID9999	HMDB0006024	C6H10O3	130.063	131.07	129.056	5.03	5.21	5	95/5 water/methanol	4	A4
281	Galactose 1-Phosphate	C00446	HMDB0000645	C6H13O9P	260.03	261.037	259.022	11.98	13.055	5	95/5 water/methanol	4	A5
282	4-Pentenoate	CSID55085	HMDB0031602	C5H8O2	100.052	101.06	99.0451			5	95/5 water/methanol	4	A6
283	dUTP	C00460	HMDB0001191	C9H15N2O14P3	467.974	468.981	466.966			5	95/5 water/methanol	4	A7
284	Phosphorylcholine	C00588	HMDB0001565	C5H14NO4P	184.074	185.081	183.067	13.04	12.185	5	95/5 water/methanol	4	A8
285	O-Acetyl-L-carnitine	C02571	HMDB0000201	C9H17NO4	204.124	205.131	203.116	11.36	10.02	5	95/5 water/methanol	4	A9
286	6-Hydroxydopamine	D05294	HMDB0001537	C8H11NO3	169.074	170.081	168.067	6.28		5	95/5 water/methanol	4	A10
287	Thiamine (B1)	C00378	HMDB0000235	C12H17N4OS	265.112	266.12	264.105			5	95/5 water/methanol	4	A11
288	dGDP	C00361	HMDB0000960	C10H15N5O10P2	427.029	428.037	426.022	12.84		5	95/5 water/methanol	4	A12
289	5-Methylcytosine	C02376	HMDB0002894	C5H7N3O	125.059	126.066	124.052	9.65	9.62	5	95/5 water/methanol	4	B1
290	Glycerate	C00258	HMDB0000139	C3H6O4	106.027	107.034	105.019	9.72	10.75	5	95/5 water/methanol	4	B2
291	2',3'-cCMP	C02354	HMDB0011691	C9H12N3O7P	305.041	306.049	304.034	10.5	11.18	5	95/5 water/methanol	4	B3
292	N,N,N-Trimethyllysine	C03793	HMDB0001325	C9H20N2O2	188.152	189.16	187.145	19.64	16.885	5	95/5 water/methanol	4	B4
293	Riboflavin (B2)	C00255	HMDB0000244	C17H20N4O6	376.138	377.146	375.131	8.12	7.83	5	95/5 water/methanol	4	B5
294	UDP-Glucose	C00029	HMDB0000286	C15H24N2O17P2	566.055	567.062	565.048			5	95/5 water/methanol	4	B6
295	Methyl Galactoside	C03619	-	C7H14O6	194.079	195.086	193.072	10.56	10.22	5	95/5 water/methanol	4	B7
296	Pyridoxal-Phosphate	C00018	HMDB0001491	C8H10NO6P	247.025	248.032	246.017	15.12	11.595	5	95/5 water/methanol	4	B8
297	Dihydroxyacetone Phosphate	C00111	HMDB0001473	C3H7O6P	169.998	171.005	168.991	11.58	12.735	5	95/5 water/methanol	4	B9
298	Phosphoenolpyruvate	C00074	HMDB0000263	C3H5O6P	167.982	168.99	166.975	13.04	14.19	5	95/5 water/methanol	4	B10
299	Mannose 6-Phosphate	C00275	HMDB0001078	C6H13O9P	260.03	261.037	259.022	12.22	13.2	5	95/5 water/methanol	4	B11
300	3-Phosphoglycerate	C00597	HMDB0000807	C3H7O7P	185.993	187	184.986	12.87	14.05	5	95/5 water/methanol	4	B12
301	L-Carnitine	C00318	HMDB0000062	C7H15NO3	161.105	162.112	160.098	12.66	11.455	5	95/5 water/methanol	4	C1
302	O-Phosphoethanolamine	C00346	HMDB0000224	C2H8NO4P	141.019	142.026	140.012	12.89	13.125	5	95/5 water/methanol	4	C2
303	O-Acetyl-L-serine	C00979	HMDB0003011	C5H9NO4	147.053	148.06	146.046	9.46	9.835	5	95/5 water/methanol	4	C3
304	CMP	C00055	HMDB0000095	C9H14N3O8P	323.052	324.059	322.045	12	12.845	5	95/5 water/methanol	4	C4
305	GDP-Mannose	C00096	HMDB0001163	C16H25N5O16P2	605.077	606.084	604.07	12.69		5	95/5 water/methanol	4	C5
306	ADP-Glucose	C00498	HMDB0006557	C16H25N5O15P2	589.082	590.09	588.075	11.09		5	95/5 water/methanol	4	C6
307	Fructose 6-Phosphate	C00085	HMDB0000124	C6H13O9P	260.03	261.037	259.022	12	13.11	5	95/5 water/methanol	4	C7
308	3',5'-ADP	C00054	HMDB0000061	C10H15N5O10P2	427.029	428.037	426.022	12.76		5	95/5 water/methanol	4	C8
309	3-Nitro-L-Tyrosine	CSID58633	HMDB0001904	C9H10N2O5	226.059	227.066	225.052	11.14	12	5	95/5 water/methanol	4	C9
310	P-Octopamine	C04227	HMDB0004825	C8H11NO2	153.079	154.086	152.072	14.51		5	95/5 water/methanol	4	C10
311	N-Alpha-Acetyl-L-lysine	C12989	HMDB0000446	C8H16N2O3	188.116	189.123	187.109	13.09	12.34	5	95/5 water/methanol	4	C11
312	UDP-Galactose	C00052	HMDB0000302	C15H24N2O17P2	566.055	567.062	565.048	11.54		5	95/5 water/methanol	4	C12
313	Dihydroxyfumarate	C00975	HMDB0002050	C4H4O6	148.001	149.008	146.993			5	95/5 water/methanol	4	D1
314	Pyridoxamine	C00534	HMDB0001431	C8H12N2O2	168.09	169.097	167.083	13.17		5	95/5 water/methanol	4	D2
315	5-Aminolevulinate	C00430	HMDB0001149	C5H9NO3	131.058	132.065	130.051	11.86	11.28	5	Water	4	D3
316	dUMP	C00365	HMDB0001409	C9H13N2O8P	308.041	309.048	307.034	10.78	11.725	5	95/5 water/methanol	4	D4
317	5'-Deoxyadenosine	C05198	HMDB0001983	C10H13N5O3	251.102	252.109	250.095	6.68	6.64	5	95/5 water/methanol	4	D5
318	Ribose 1,5-Bisphosphate	C01182	-	C5H12O11P2	309.985	310.993	308.978	3.56		5	95/5 water/methanol	4	D6
319	Xanthosine-Monophosphate	C00655	HMDB0001554	C10H13N4O9P	364.042	365.049	363.035	12.82	14.18	5	95/5 water/methanol	4	D7
320	FAD	C00016	HMDB0001248	C27H33N9O15P2	785.157	786.164	784.15	9.44		5	95/5 water/methanol	4	D8
321	Deoxyguanosine	C00330	HMDB0000085	C10H13N5O4	267.097	268.104	266.089	10.6	10.48	5	95/5 water/methanol	4	D9
322	Orotate	C00295	HMDB0000226	C5H4N2O4	156.017	157.024	155.01	7.18	9.69	5	Water	4	D10
323	Lauroyl-L-carnitine	CSID147288	HMDB0002250	C19H38NO4	344.28	345.287	343.273	4.86		5	95/5 water/methanol	4	D11
324	1-Methylnicotinamide	C02918	HMDB0000699	C7H9N2O	137.071	138.079	136.064	20.1		5	95/5 water/methanol	4	D12
325	Spermine	C00750	HMDB0001256	C10H26N4	202.216	203.223	201.208	7.97		5	95/5 water/methanol	4	E1
326	N-Acetyl-methionine	C02712	HMDB0011745	C7H13NO3S	191.062	192.069	190.054	4.91	5.225	5	95/5 water/methanol	4	E2
327	Carbamoyl Phosphate	C00169	HMDB0001096	CH4NO5P	140.983	141.99	139.975			5	95/5 water/methanol	4	E3
328	5-Phosphoribose 1-diphosphate	C00119	HMDB0000280	C5H13O14P3	389.952	390.959	388.945			5	95/5 water/methanol	4	E4
329	AICAR	C04677	HMDB0001517	C9H15N4O8P	338.063	339.07	337.055	11.67	12.57	5	95/5 water/methanol	4	E5
330	UDP-N-Acetylgalactosamine	C00203	HMDB0000304	C17H27N3O17P2	607.082	608.089	606.074	10.96		5	95/5 water/methanol	4	E6
331	Glyceraldehyde 3-Phosphate	C00661	HMDB0001112	C3H7O6P	169.998	171.005	168.991			5	95/5 water/methanol	4	E7
332	cGMP	C00942	HMDB0001314	C10H12N5O7P	345.047	346.055	344.04	10.52	11.58	5	95/5 water/methanol	4	E8
333	Homocysteine Thiolactone	CSID96881	HMDB0002287	C4H7NOS	117.025	118.032	116.018	5.36	5.68	5	95/5 water/methanol	4	E9
334	O-Phosphoserine	C01005	HMDB0001721	C3H8NO6P	185.009	186.016	184.002	12.27	13.36	5	95/5 water/methanol	4	E10
335	S-Adenosylhomocysteine	C00021	HMDB0000939	C14H20N6O5S	384.122	385.129	383.114	11.85	11.54	5	95/5 water/methanol	4	E11
336	L-Ornithine	C00077	HMDB0000214	C5H12N2O2	132.09	133.097	131.083	17.95	17.335	5	95/5 water/methanol	4	E12
337	Adenine	C00147	HMDB0000034	C5H5N5	135.054	136.062	134.047	9.06	9	5	95/5 water/methanol	4	F1
338	Normetanephrine	C05589	HMDB0000819	C9H13NO3	183.09	184.097	182.082	13.47		5	95/5 water/methanol	4	F2
339	UDP-N-acetylglucosamine	C00043	HMDB0000290	C17H27N3O17P2	607.082	608.089	606.074	10.89		5	95/5 water/methanol	4	F3
340	GDP	C00035	HMDB0001201	C10H15N5O11P2	443.024	444.032	442.017			5	95/5 water/methanol	4	F4
341	Glutathione Reduced	C00051	HMDB0000125	C10H17N3O6S	307.084	308.091	306.077	11.35		5	95/5 water/methanol	4	F5
342	UDP-Glucuronate	C00167	HMDB0000935	C15H22N2O18P2	580.034	581.042	579.027	12.64		5	95/5 water/methanol	4	F6
343	N,N-Dimethylarginine	C03626	HMDB0001539	C8H18N4O2	202.143	203.15	201.136	18.06	17.155	5	95/5 water/methanol	4	F7
344	CDP	C00112	HMDB0001546	C9H15N3O11P2	403.018	404.025	402.011	12.74		5	95/5 water/methanol	4	F8
345	Selenocystamine	CSID103013	-	C4H12N2Se2	247.933	248.94	246.926			5	95/5 water/methanol	4	F9
346	Histamine	C00388	HMDB0000870	C5H9N3	111.08	112.087	110.072	21.49		5	95/5 water/methanol	4	F10
347	Indoxyl Sulfate	C08481	HMDB0000682	C8H7NO4S	213.01	214.017	212.002	4.86	7.445	5	95/5 water/methanol	4	F11
348	Ureidopropionate	C02642	HMDB0000026	C4H8N2O3	132.053	133.061	131.046	10.33	10.855	5	95/5 water/methanol	4	F12
349	Deoxyribose	C01801	HMDB0003224	C5H10O4	134.058	135.065	133.051	9.52		5	95/5 water/methanol	4	G1
350	Phytate	C01204	HMDB0003502	C6H18O24P6	659.861	660.869	658.854			5	Water	4	G2
351	Trimethylacetic Acid	CSID6177	HMDB0041992	C5H10O2	102.068	103.075	101.061	4.88		5	95/5 water/methanol	4	G3
352	Uracil 5-Carboxylate	C03030	-	C5H4N2O4	156.017	157.024	155.01	10.57	11.76	5	95/5 water/methanol	4	G4
353	S-Hexyl-Glutathione	C02886	-	C16H29N3O6S	391.178	392.185	390.17	4.92	5.22	5	95/5 water/methanol	4	G5
354	Glyoxylate	C00048	HMDB0000119	C2H2O3	74.0004	75.0077	72.9931			5	95/5 water/methanol	4	G6
355	GMP	C00144	HMDB0001397	C10H14N5O8P	363.058	364.065	362.051	12.42	13.49	5	95/5 water/methanol	4	G7
356	N-Acetyl-L-alanine	CSID79449	HMDB0000766	C5H9NO3	131.058	132.066	130.051	7.8	7.69	5	95/5 water/methanol	4	G8
357	4-Guanidinobutanoate	C01035	HMDB0003464	C5H11N3O2	145.085	146.092	144.078	13.5	12.73	5	95/5 water/methanol	4	G9
358	Hydroxypyruvate	C00168	HMDB0001352	C3H4O4	104.011	105.018	103.004			5	95/5 water/methanol	4	G10
359	Mannosamine	C03570	-	C6H13NO5	179.079	180.087	178.072	12.68	12.71	5	95/5 water/methanol	4	G11
360	Cytochrome C	C00524	-	C42H52FeN8O6S2	884.28	885.287	883.273			5	95/5 water/methanol	4	G12
361	Deoxyadenosine	C00559	HMDB0000101	C10H13N5O3	251.102	252.109	250.095	7.73	7.43	5	95/5 water/methanol	5	A1
362	N-Acetylputrescine	C02714	HMDB0002064	C6H14N2O	130.111	131.118	129.103	17.85	18.66	5	95/5 water/methanol	5	A2
363	N-Acetylgalactosamine	C01074	HMDB0000212	C8H15NO6	221.09	222.097	220.083	11.2	10.75	5	95/5 water/methanol	5	A3
364	N-Acetylglutamate	C00624	HMDB0001138	C7H11NO5	189.064	190.071	188.056	10.85	12.07	5	95/5 water/methanol	5	A4
365	2,4-Dihydroxypteridine	C03212	HMDB0254198	C6H4N4O2	164.033	165.041	163.026	7.21	8.69	5	95/5 water/methanol	5	A5
366	6-Hydroxynicotinate	C01020	HMDB0002658	C6H5NO3	139.027	140.034	138.02	9.68	10.135	5	95/5 water/methanol	5	A6
367	N-Acetyl-L-cysteine	C06809	HMDB0001890	C5H9NO3S	163.03	164.038	162.023	6.32	6.53	5	95/5 water/methanol	5	A7
368	IMP	C00130	HMDB0000175	C10H13N4O8P	348.047	349.054	347.04	11.72	12.725	5	95/5 water/methanol	5	A8
369	Pantothenate	C00864	HMDB0000210	C9H17NO5	219.111	220.118	218.103	7.15	7.445	5	95/5 water/methanol	5	A9
370	2-Aminoisobutyrate	C03665	HMDB0001906	C4H9NO2	103.063	104.071	102.056	12.45	12.05	5	95/5 water/methanol	5	A10
371	Aniline-2-Sulfonate	C06333	HMDB0304940	C6H7NO3S	173.015	174.022	172.007	6.24	7.81	5	95/5 water/methanol	5	A11
372	S-Carboxymethylcysteine	C03727	HMDB0029415	C5H9NO4S	179.025	180.033	178.018	11.33	12.23	5	95/5 water/methanol	5	A12
373	Rhamnose	C00507	HMDB0000849	C6H12O5	164.068	165.076	163.061			5	95/5 water/methanol	5	B1
374	Thiamine Pyrophosphate	C00068	HMDB0001372	C12H18N4O7P2S	425.045	426.052	424.038	12.82		5	95/5 water/methanol	5	B2
375	Histidinol	C00860	HMDB0003431	C6H11N3O	141.09	142.098	140.083	16.07		5	95/5 water/methanol	5	B3
376	TMP	C00364	HMDB0001227	C10H15N2O8P	322.057	323.064	321.049			5	95/5 water/methanol	5	B4
377	Ureidopropionate	C02642	HMDB0000026	C4H8N2O3	132.053	133.061	131.046	10.32	10.8	5	95/5 water/methanol	5	B5
378	5-Aminopentanoate	C00431	HMDB0003355	C5H11NO2	117.079	118.086	116.072	13.62	12.805	5	95/5 water/methanol	5	B6
379	L-Norleucine	C01933	HMDB0001645	C6H13NO2	131.095	132.102	130.087	10.37	10	5	95/5 water/methanol	5	B7
380	N-Formylglycine	CSID68130	HMDB0255145	C3H5NO3	103.027	104.034	102.02	9.34	10.08	5	95/5 water/methanol	5	B8
381	Adenosine	C00212	HMDB0000050	C10H13N5O4	267.097	268.104	266.089	8.79	8.47	5	95/5 water/methanol	5	B9
382	Raffinose	C00492	HMDB0003213	C18H32O16	504.169	505.176	503.162	13.47		5	95/5 water/methanol	5	B10
383	Meso-Tartrate	C00552	-	C4H606	150.016	151.024	149.009			5	95/5 water/methanol	5	B11
384	2-Acetamido-2-Deoxy-Beta-D-Glucosylamine	C01239	HMDB0001104	C8H16N2O5	220.106	221.113	219.099	11.72		5	95/5 water/methanol	5	B12
385	Saccharate	C00818	HMDB0029881	C6H10O8	210.038	211.045	209.03	11.82	13.95	5	95/5 water/methanol	5	C1
386	ATP	C00002	HMDB0000538	C10H16N5O13P3	506.996	508.003	505.988	12.52		5	95/5 water/methanol	5	C2
387	3-Methoxytyrosine	CSID1607	HMDB0001434	C10H13NO4	211.084	212.092	210.077	11.24	10.89	5	95/5 water/methanol	5	C3
388	Lactose	C00243	HMDB0000186	C12H22O11	342.116	343.124	341.109	13.25	13.065	5	95/5 water/methanol	5	C4
389	3-Hydroxybutanoate	C01089	HMDB0000357	C4H8O3	104.047	105.055	103.04	4.91	5.105	5	95/5 water/methanol	5	C5
390	4-Imidazoleacetate	C02835	HMDB0002024	C5H6N2O2	126.043	127.05	125.036	10.71	10.57	5	95/5 water/methanol	5	C6
391	Galacturonate	C08348	HMDB0003402	C6H10O7	194.043	195.05	193.035	12.1	13.33	5	95/5 water/methanol	5	C7
392	CTP	C00063	HMDB0000082	C9H16N3O14P3	482.985	483.992	481.977	13.27		5	95/5 water/methanol	5	C8
393	cAMP	C00575	HMDB0000058	C10H12N5O6P	329.053	330.06	328.045	8.79	9.27	5	95/5 water/methanol	5	C9
394	Methionine Sulfoximine	C03510	-	C5H12N2O3S	180.057	181.064	179.05	12.04	11.845	5	95/5 water/methanol	5	C10
395	Cis-4-Hydroxy-D-Proline	C03440	HMDB0060460	C5H9NO3	131.058	132.066	130.051	13.19	12.695	5	95/5 water/methanol	5	C11
396	N1-Acetylspermine	C02567	HMDB0001186	C12H28N4O	244.226	245.234	243.219			5	95/5 water/methanol	5	C12
397	Glucosamine 6-Sulfate	C04132	HMDB0000592	C6H13NO8S	259.036	260.043	258.029	12.15	13.97	5	95/5 water/methanol	5	D1
398	NADPH	C00005	HMDB0000221	C21H30N7O17P3	745.091	746.098	744.084	12.61		5	95/5 water/methanol	5	D2
399	3-Methylhistamine	CSID62725	HMDB0001861	C6H11N3	125.095	126.103	124.088	18.77		5	95/5 water/methanol	5	D3
400	Maleamate	C01596	-	C4H5NO3	115.027	116.034	114.02	8.85		5	95/5 water/methanol	5	D4
401	Choline	C00114	HMDB0000097	C5H14NO	104.108	105.115	103.1			5	95/5 water/methanol	5	D5
402	Methyl-4-Aminobutyrate	CSID17580	-	C5H11NO2	117.079	118.086	116.072	13.73	18.05	5	95/5 water/methanol	5	D6
403	N-Formyl-L-Methionine	C03145	HMDB0001015	C6H11NO3S	177.046	178.053	176.039	4.91	5.28	5	95/5 water/methanol	5	D7
404	Acetylcholine	C01996	HMDB0000895	C7H16NO2	146.118	147.125	145.111			5	95/5 water/methanol	5	D8
405	Oxalate	C00209	HMDB0002329	C2H2O4	89.9953	91.0026	88.988	12.92	14.47	5	95/5 water/methanol	5	D9
406	5-Hydroxytryptophan	C00643	HMDB0000472	C11H12N2O3	220.085	221.092	219.077	12.96	12.885	5	95/5 water/methanol	5	D10
407	D-Alanine	C00133	HMDB0001310	C3H7NO2	89.0477	90.055	88.0404	12.91	12.57	5	95/5 water/methanol	5	D11
408	Theobromine	C07480	HMDB0002825	C7H8N4O2	180.065	181.072	179.057	5.41	5.63	5	95/5 water/methanol	5	D12
409	Guanidinosuccinate	C03139	HMDB0003157	C5H9N3O4	175.059	176.067	174.052	12.19	12.855	5	95/5 water/methanol	5	E1
410	L-Histidine	C00135	HMDB0000177	C6H9N3O2	155.069	156.077	154.062	13.19	12.67	5	95/5 water/methanol	5	E2
411	Allothreonine	C05519	HMDB0004041	C4H9NO3	119.058	120.066	118.051	12.49	12.265	5	95/5 water/methanol	5	E3
412	Phosphocreatine	C02305	HMDB0001511	C4H10N3O5P	211.036	212.043	210.029	11.52	12.545	5	95/5 water/methanol	5	E4
413	Spermidine	C00315	HMDB0001257	C7H19N3	145.158	146.165	144.151			5	95/5 water/methanol	5	E5
414	ADP-Ribose	C00301	HMDB0001178	C15H23N5O14P2	559.072	560.079	558.064	11.1		5	95/5 water/methanol	5	E6
415	2-Methoxyethanol	CSID7728	HMDB0245203	C3H8O2	76.0524	77.0597	75.0451			5	95/5 water/methanol	5	E7
416	Citramalate	C00815	HMDB0000426	C5H8O5	148.037	149.044	147.03	11.89	12.76	5	95/5 water/methanol	5	E8
417	Anserine	C01262	HMDB0000194	C10H16N4O3	240.122	241.13	239.115	13.16	11.915	5	95/5 water/methanol	5	E9
418	Biliverdin	C00500	HMDB0001008	C33H34N4O6	582.248	583.255	581.241	4.17		5	95/5 water/methanol	5	E10
419	5-Hydroxylysine	C16741	HMDB0000450	C6H14N2O3	162.1	163.108	161.093	17.7	17.21	5	95/5 water/methanol	5	E11
420	Cysteamine	C01678	HMDB0002991	C2H7NS	77.0299	78.0372	76.0226			5	95/5 water/methanol	5	E12
421	Ophthalmate	CSID5381695	HMDB0005765	C11H19N3O6	289.127	290.135	288.12	10.96	11.36	5	95/5 water/methanol	5	F1
422	Mesoxalate	C00830	HMDB0031522	C3H2O5	117.99	118.998	116.983	13.1		5	95/5 water/methanol	5	F2
423	Trigonelline	C01004	HMDB0000875	C7H7NO2	137.048	138.055	136.04	11.65	10.685	5	95/5 water/methanol	5	F3
424	Epinephrine	C00788	HMDB0000068	C9H13NO3	183.09	184.097	182.082			5	95/5 water/methanol	5	F4
425	3,4-Dihydroxyphenylglycol	C05576	HMDB0000318	C8H10O4	170.058	171.065	169.051	10.21		5	95/5 water/methanol	5	F5
426	Cadaverine	C01672	HMDB0002322	C5H14N2	102.116	103.123	101.108			5	95/5 water/methanol	5	F6
427	2-Hydroxybutyrate	C05984	HMDB0000008	C4H8O3	104.047	105.055	103.04	6.4	6.96	5	95/5 water/methanol	5	F7
428	Coenzyme A	C00010	HMDB0001423	C21H36N7O16P3S	767.115	768.123	766.108	11.38		5	95/5 water/methanol	5	F8
429	Oxalomalate	C01990	HMDB0245962	C6H6O8	206.006	207.014	204.999			5	95/5 water/methanol	5	F9
430	ITP	C00081	HMDB0000189	C10H15N4O14P3	507.98	508.987	506.972	13.07		5	95/5 water/methanol	5	F10
431	5-Methylcytidine	CSID83877	HMDB0000982	C10H15N3O5	257.101	258.108	256.094	10.32	10.105	5	95/5 water/methanol	5	F11
432	4,6-Dihydroxyquinoline	C05639	HMDB0004077	C9H7NO2	161.048	162.055	160.04	8.23	8.275	5	95/5 water/methanol	5	F12
433	Stachyose	C01613	HMDB0003553	C24H42O21	666.222	667.229	665.215	13.93		5	95/5 water/methanol	5	G1
434	dCDP	C00705	HMDB0001245	C9H15N3O10P2	387.023	388.031	386.016	12.55	13.275	5	95/5 water/methanol	5	G2
435	N8-Acetylspermidine	C01029	HMDB0002189	C9H21N3O	187.168	188.176	186.161	18.07		5	95/5 water/methanol	5	G3
436	Ribose 5-phosphate	C00117	HMDB0001548	C5H11O8P	230.019	231.026	229.012	11.94	12.955	5	95/5 water/methanol	5	G4
437	Hydroxykynurenine	C02794	HMDB0000732	C10H12N2O4	224.08	225.087	223.072	11.8	11.7	5	95/5 water/methanol	5	G5
438	Galactosamine	C02262	-	C6H13NO5	179.079	180.087	178.072	13.2	12.99	5	95/5 water/methanol	5	G6
439	dATP	C00131	HMDB0001532	C10H16N5O12P3	491.001	492.008	489.994	12.36		5	95/5 water/methanol	5	G7
440	Glycerol 3-Phosphate	C00093	HMDB0000126	C3H9O6P	172.014	173.021	171.006	11.55	12.515	5	95/5 water/methanol	5	G8
441	Cyanocobalamin (B12)	C02823	HMDB0000607	C63H89CoN14O14P	1355.58	1356.58	1354.57	10.66		5	95/5 water/methanol	5	G9
442	4-Hydroxy-L-Phenylglycine	C12323	-	C8H9NO3	167.058	168.066	166.051	12.98	12.9	5	95/5 water/methanol	5	G10
443	N-Acetylserine	CSID312807	HMDB0002931	C5H9NO4	147.053	148.06	146.046	9.21	9.84	5	95/5 water/methanol	5	G11
444	UDP	C00015	HMDB0000295	C9H14N2O12P2	404.002	405.009	402.995	12.37		5	95/5 water/methanol	5	G12
445	3-Methyglutarate	CSID11549	HMDB0000752	C6H10O4	146.058	147.065	145.051	10.78	12.055	5	95/5 water/methanol	6	A1
446	Sorbate	CSID558605	HMDB0029581	C6H8O2	112.052	113.06	111.045	4.89	5	5	95/5 water/methanol	6	A2
447	Adenosine Phosphosulfate	C00224	HMDB0001003	C10H14N5O10PS	427.02	428.027	426.013			5	95/5 water/methanol	6	A3
448	Gluconolactone	C00198	HMDB0000150	C6H10O6	178.048	179.055	177.04	11.05	10.63	5	95/5 water/methanol	6	A4
449	4-Hydroxybenzoate	C00156	HMDB0000500	C7H6O3	138.032	139.039	137.024	8.83	10.07	5	95/5 water/methanol	6	A5
450	Tyramine	C00483	HMDB0000306	C8H11NO	137.084	138.091	136.077	15.53		5	95/5 water/methanol	6	A6
451	Cortisol	C00735	HMDB0000063	C21H30O5	362.209	363.217	361.202	4.4	4.74	5	95/5 water/methanol	6	A7
452	Prenol	C01390	HMDB0030124	C5H10O	86.0732	87.0805	85.0659			5	95/5 water/methanol	6	A8
453	3-Hydroxybenzaldehyde	C03067	-	C7H6O2	122.037	123.044	121.029	4.43	5	5	95/5 water/methanol	6	A9
454	Xanthurenate	C02470	HMDB0000881	C10H7NO4	205.038	206.045	204.03	8.78	10.28	5	Water	6	A10
455	Isobutyraldehyde Oxime	C03219	-	C4H9NO	87.0684	88.0757	86.0611			5	95/5 water/methanol	6	A11
456	Indoxyl Beta-glucoside	C08481	HMDB0061755	C14H17NO6	295.106	296.113	294.098			5	95/5 water/methanol	6	A12
457	Trimethylamine	C00565	HMDB0000906	C3H9N	59.0735	60.0808	58.0662		18.64	5	95/5 water/methanol	6	B1
458	Melatonin	C01598	HMDB0001389	C13H16N2O2	232.121	233.128	231.114	4.41	4.6	5	95/5 water/methanol	6	B2
459	Maleate	C01384	HMDB0000176	C4H4O4	116.011	117.018	115.004	6.27	9.47	5	Water	6	B3
460	Valerate	C00803	HMDB0000892	C5H10O2	102.068	103.075	101.061	4.88		5	95/5 water/methanol	6	B4
461	Propanoate	C00163	HMDB0000237	C3H6O2	74.0368	75.0441	73.0295			5	95/5 water/methanol	6	B5
462	Bilirubin	C00486	HMDB0000054	C33H36N4O6	584.263	585.271	583.256	3.92		5	95/5 water/methanol	6	B6
463	Nicotine	C00745	HMDB0001934	C10H14N2	162.116	163.123	161.108	6.43	5.19	5	95/5 water/methanol	6	B7
464	Pregnenolone Sulfate	C18044	HMDB0000774	C21H32O5S	396.197	397.204	395.19	3.56		5	95/5 water/methanol	6	B8
465	Kynurenate	C01717	HMDB0000715	C10H7NO3	189.043	190.05	188.035	5.04	5.11	5	Water	6	B9
466	Isobutyrate	C02632	HMDB0001873	C4H8O2	88.0524	89.0597	87.0451			5	95/5 water/methanol	6	B10
467	3-Hydroxybenzyl Alcohol	C03351	HMDB0059712	C7H8O2	124.052	125.06	123.045	5.19	5.66	5	95/5 water/methanol	6	B11
468	Aniline	C00292	HMDB0003012	C6H7N	93.0578	94.0651	92.0505			5	95/5 water/methanol	6	B12
469	Acetoin	C00466	HMDB0003243	C4H8O2	88.0524	89.0597	87.0451	11.31	5.42	5	95/5 water/methanol	6	C1
470	3,5-Diiodo-L-tyrosine	C01060	HMDB0003474	C9H9I2NO3	432.867	433.874	431.86	10.87		5	95/5 water/methanol	6	C2
471	Mandelate	C01984	HMDB0000703	C8H8O3	152.047	153.055	151.04	4.89	5.42	5	95/5 water/methanol	6	C3
472	Tryptamine	C00398	HMDB0000303	C10H12N2	160.1	161.107	159.093	14.47		5	95/5 water/methanol	6	C4
473	4-Aminobenzoate	C00568	HMDB0001392	C7H7NO2	137.048	138.055	136.04	9.34	9.975	5	95/5 water/methanol	6	C5
474	Glutarate	C00489	HMDB0000661	C5H8O4	132.042	133.049	131.035	11.44	12.55	5	Water	6	C6
475	5-Valerolactone	C02240	HMDB0250981	C5H8O2	100.052	101.06	99.0451	4.21	3.97	5	95/5 water/methanol	6	C7
476	Caffeate	C01481	HMDB0001964	C9H8O4	180.042	181.05	179.035	10.39	11.005	5	95/5 water/methanol	6	C8
477	Lumichrome	C01727	HMDB0254199	C12H10N4O2	242.08	243.088	241.073	4.7	5.385	5	95/5 water/methanol	6	C9
478	Beta-Alanine	C00099	HMDB0000056	C3H7NO2	89.0477	90.055	88.0404	13.37	12.84	5	95/5 water/methanol	6	C10
479	N-Acetylphenylalanine	C03519	HMDB0000512	C11H13NO3	207.09	208.097	206.082	4.81	4.735	5	95/5 water/methanol	6	C11
480	N-Acetylproline	CSID59528	HMDB0094701	C7H11NO3	157.074	158.081	156.067	7.72	7.06	5	95/5 water/methanol	6	C12
481	L-Tryptophanamide	C00977	HMDB0013318	C11H13N3O	203.106	204.113	202.099	6.34	7.1	5	95/5 water/methanol	6	D1
482	Phenol	C00146	HMDB0000228	C6H6O	94.0419	95.0492	93.0346			5	95/5 water/methanol	6	D2
483	Phosphohydroxypyruvic Acid	C03232	HMDB0001024	C3H5O7P	183.977	184.985	182.97			5	95/5 water/methanol	6	D3
484	Oxaloacetate	C00036	HMDB0000223	C4H4O5	132.006	133.013	130.999			5	95/5 water/methanol	6	D4
485	2,3-Dihydroxybenzoate	C00196	HMDB0000397	C7H6O4	154.027	155.034	153.019	6.17	7.53	5	95/5 water/methanol	6	D5
486	2-Propenoate	C00511	HMDB0031647	C3H4O2	72.0211	73.0284	71.0138			5	95/5 water/methanol	6	D6
487	Indole-3-Ethanol	C00955	HMDB0003447	C10H11NO	161.084	162.091	160.077	4.57	5.095	5	95/5 water/methanol	6	D7
488	Ferulate	C01494	HMDB0000954	C10H10O4	194.058	195.065	193.051	6.25	6.495	5	95/5 water/methanol	6	D8
489	Glycocholate	C01921	HMDB0000138	C26H43NO6	465.309	466.316	464.302	4.87		5	95/5 water/methanol	6	D9
490	2-Hydroxyphenethylamine	C02735	HMDB0001065	C8H11NO	137.084	138.091	136.077	11.19	17.94	5	95/5 water/methanol	6	D10
491	Thiopurine S-Methylether	C16614	HMDB0060412	C6H6N4S	166.031	167.039	165.024	5.36	6.035	5	95/5 water/methanol	6	D11
492	2-Hydroxy-4-(Methylthio)Butanoate	CSID10946	HMDB0037115	C5H10O3S	150.035	151.042	149.028	4.83	5.2	5	95/5 water/methanol	6	D12
493	Glycochenodeoxycholate	C05466	HMDB0000637	C26H43NO5	449.314	450.321	448.307	4.2		5	95/5 water/methanol	6	E1
494	Benzoate	C00539	HMDB0001870	C7H6O2	122.037	123.044	121.03			5	Water	6	E2
495	3-Amino-5-Hydroxybenzoate	C12107	HMDB0304942	C7H7NO3	153.043	154.05	152.035	11.37	12.61	5	95/5 water/methanol	6	E3
496	Pyrocatechol	C00090	HMDB0000957	C6H6O2	110.037	111.044	109.029		12.59	5	95/5 water/methanol	6	E4
497	3,4-Dihydroxybenzoate	C00230	HMDB0001856	C7H6O4	154.027	155.034	153.019	11.54	12.59	5	95/5 water/methanol	6	E5
498	Cyclopentanone	C00557	HMDB0031407	C5H8O	84.0575	85.0648	83.0502			5	95/5 water/methanol	6	E6
499	Pantolactone	C01012	YMDB00796	C6H10O3	130.063	131.07	129.056			5	95/5 water/methanol	6	E7
500	Guaiacol	C01502	HMDB0001398	C7H8O2	124.052	125.06	123.045			5	95/5 water/methanol	6	E8
501	2-Hydroxyphenylacetate	C05852	HMDB0000669	C8H8O3	152.047	153.055	151.04	5.01	5.14	5	Water	6	E9
502	10-Hydroxydecanoate	C02774	HMDB0244272	C10H20O3	188.141	189.149	187.134	4.64	4.415	5	95/5 water/methanol	6	E10
503	Didecanoyl-Glycerophosphocholine	CSID17347207	-	C28H56NO8P	565.374	566.382	564.367	4.09		5	95/5 water/methanol	6	E11
504	2-Hydroxypyridine	C02502	HMDB0013751	C5H5NO	95.0371	96.0444	94.0298	6.68	6.63	5	95/5 water/methanol	6	E12
505	3,4-Dihydroxyphenylacetate	C01161	HMDB0001336	C8H8O4	168.042	169.05	167.035	8.85	10.28	5	95/5 water/methanol	6	F1
506	N6-(Delta2-Isopentenyl)-Adenine	C04083	HMDB0245646	C10H13N5	203.117	204.124	202.11	4.76	5.155	5	95/5 water/methanol	6	F2
507	Methyl Vanillate	CSID18696	HMDB0240266	C9H10O4	182.058	183.065	181.051	4.18	4.56	5	95/5 water/methanol	6	F3
508	2-Oxobutanoate	C00109	HMDB0000005	C4H6O3	102.032	103.039	101.024			5	95/5 water/methanol	6	F4
509	Lipoamide	C00248	HMDB0000962	C8H15NOS2	205.06	206.067	204.052	4.37	4.905	5	95/5 water/methanol	6	F5
510	3-Hydroxyanthranilate	C00632	HMDB0001476	C7H7NO3	153.043	154.05	152.035	9.57	10.94	5	95/5 water/methanol	6	F6
511	3-(4-Hydroxyphenyl)Pyruvate	C01179	HMDB0000707	C9H8O4	180.042	181.05	179.035	6.18	7.5	5	95/5 water/methanol	6	F7
512	Hexanoate	C01585	HMDB0000535	C6H12O2	116.084	117.091	115.076	4.74		5	95/5 water/methanol	6	F8
513	Methylmalonate	C02170	HMDB0000202	C4H6O4	118.027	119.034	117.019	10.92	12.49	5	Water	6	F9
514	5-Methylcytidine	CSID83877	HMDB0000982	C10H15N3O5	257.101	258.108	256.094	10.33	10.09	5	95/5 water/methanol	6	F10
515	Cortisol-21-Acetate	C02821	-	C23H32O6	404.22	405.227	403.213	4		5	95/5 water/methanol	6	F11
516	Indole-3-acetate	C00954	HMDB0000197	C10H9NO2	175.063	176.071	174.056	7.74	8.115	5	Water	6	F12
517	Hippurate	C01586	HMDB0000714	C9H9NO3	179.058	180.065	178.051	5.025	5.1	5	Water	6	G1
518	Ethylmalonate	CSID11263	HMDB0000622	C5H8O4	132.042	133.05	131.035	9.74	11.37	5	95/5 water/methanol	6	G2
519	3,5-Diiodo-L-Thyronine	CSID110252	HMDB0000582	C15H13I2NO4	524.893	525.901	523.886	6.33		5	95/5 water/methanol	6	G3
520	Fumarate	C00122	HMDB0000134	C4H4O4	116.011	117.018	115.004	12.09	13.58	5	Water	6	G4
521	3-Cresotinate	C14088	HMDB0002390	C8H8O3	152.047	153.055	151.04	4.2	4.41	5	95/5 water/methanol	6	G5
522	4-Hydroxybenzaldehyde	C00633	HMDB0011718	C7H6O2	122.037	123.044	121.029	4.74	5.12	5	95/5 water/methanol	6	G6
523	3-(2-Hydroxyphenyl)Propanoate	C01198	HMDB0033752	C9H10O3	166.063	167.07	165.056	4.94	5.05	5	95/5 water/methanol	6	G7
524	3-Methoxytyramine	C05587	HMDB0000022	C9H13NO2	167.095	168.102	166.087	14.34		5	95/5 water/methanol	6	G8
525	Benzylamine	C15562	HMDB0033871	C7H9N	107.073	108.081	106.066	10.4		5	95/5 water/methanol	6	G9
526	2-Quinolinecarboxylate	C06325	HMDB0000842	C10H7NO2	173.048	174.055	172.04	5.23	5.21	5	95/5 water/methanol	6	G10
527	Serotonin	C00780	HMDB0000259	C10H12N2O	176.095	177.102	175.088			5	95/5 water/methanol	6	G11
528	Pterin	C00715	HMDB0000802	C6H5N5O	163.049	164.057	162.042	9.77	10.15	5	95/5 water/methanol	6	G12
529	N-Acetyl Carnosine	CSID8396518	HMDB0012881	C11H16N4O4	268.117	269.124	267.11	9.64	9.095	5	95/5 water/methanol	6	H1
530	2-Aminophenol	C01987	-	C6H7NO	109.053	110.06	108.045	5.05	5.845	5	95/5 water/methanol	6	H2
531	6-Carboxyhexanoate	C02656	HMDB0000857	C7H12O4	160.074	161.081	159.066	10.62	11.6	5	95/5 water/methanol	6	H3
532	Indole-3-pyruvate	C00331	HMDB0060484	C11H9NO3	203.058	204.065	202.051	5.05		5	Water	6	H4
533	Dehydroascorbate	C00425	HMDB0001264	C6H6O6	348.033	349.04	347.026	7.15	9.82	5	95/5 water/methanol	6	H5
534	3-Amino-4-Hydroxybenzoate	C12115	HMDB0304941	C7H7NO3	153.043	154.05	152.035	11.11	12.17	5	95/5 water/methanol	6	H6
535	3,4 Dihydroxymandelate	C05580	HMDB0001866	C8H8O5	184.037	185.044	183.03	11.21	12.96	5	95/5 water/methanol	6	H7
536	2-Methylcitrate	C02225	HMDB0000379	C7H10O7	206.043	207.05	205.035	12.4		5	95/5 water/methanol	6	H8
537	Dihydrobiopterin	C02953	HMDB0000038	C9H13N5O3	239.102	240.109	238.095	11.32	11.345	5	95/5 water/methanol	6	H9
538	Beta-Glycerophosphate	C02979	HMDB0002520	C3H9O6P	172.014	173.021	171.006	11.29	12.18	5	95/5 water/methanol	6	H10
539	Glucose 1-phosphate	C00103	HMDB0001586	C6H13O9P	260.03	261.037	259.022	11.95	12.985	5	95/5 water/methanol	6	H11
540	2,3-Diaminopropionate	C03401	HMDB0002006	C3H8N2O2	104.059	105.066	103.051	13.74	13.76	5	95/5 water/methanol	6	H12
541	2-Methoxyestrone	C05299	HMDB0000010	C19H24O3	300.173	301.18	299.165	4		5	60/40 water/ethanol	7	A1
542	4-Quinolinecarboxylate	C06414	HMDB0257047	C10H7NO2	173.048	174.055	172.04	5	5.19	5	60/40 water/ethanol	7	A2
543	Hydroquinone	C00530	HMDB0002434	C6H6O2	110.037	111.044	109.029	5.72	6.37	5	60/40 water/ethanol	7	A3
544	Dethiobiotin	C01909	HMDB0003581	C10H18N2O3	214.132	215.139	213.124	4.89	5.21	5	60/40 water/ethanol	7	A4
545	3-Hydroxybenzoate	C00587	HMDB0002466	C7H6O3	138.032	139.039	137.024	7.87	9.23	5	60/40 water/ethanol	7	A5
546	2-Methylbutanal	C02223	HMDB0031526	C5H10O	86.0732	87.0805	85.0659			5	60/40 water/ethanol	7	A6
547	N-Acetylserotonin	C00978	HMDB0001238	C12H14N2O2	218.106	219.113	217.098	5.7	5.47	5	60/40 water/ethanol	7	A7
548	N-Ethyl-5-Methyl-2-(1-Methylethyl)-Cyclohexanecarboxamide	CSID56632	HMDB0037834	C13H25NO	211.194	212.201	210.186	3.93	4.23	5	60/40 water/ethanol	7	A8
549	Itaconate	C00490	HMDB0002092	C5H6O4	130.027	131.034	129.019	11.19	12.85	5	60/40 water/ethanol	7	A9
550	Azelate	C08261	HMDB0000784	C9H16O4	188.105	189.112	187.098	9.64	10.135	5	60/40 water/ethanol	7	A10
551	Oxoadipate	C00322	HMDB0000225	C6H8O5	160.037	161.044	159.03	10.84	12.71	5	95/5 water/methanol	7	A11
552	2-Methylglutarate	CSID2497362	HMDB0000422	C6H10O4	146.058	147.065	145.051	10.66	11.99	5	60/40 water/ethanol	7	A12
553	Phenylacetaldehyde	C00601	HMDB0006236	C8H8O	120.058	121.065	119.05	4.77	4.9	5	60/40 water/ethanol	7	B1
554	3-Methyl-2-Oxovalerate	C03465	HMDB0000491	C6H10O3	130.063	131.07	129.056	4.48	4.66	5	60/40 water/ethanol	7	B2
555	4-Methoxyphenylacetate	CSID 7406	HMDB0002072	C9H10O3	166.063	167.07	165.056	4.8	4.89	5	60/40 water/ethanol	7	B3
556	2,3-Butanedione	C00741	HMDB0003407	C4H6O2	86.0368	87.0441	85.0295			5	60/40 water/ethanol	7	B4
557	Pyruvate	C00022	HMDB0000243	C3H4O3	88.016	89.0233	87.0087			5	60/40 water/ethanol	7	B5
558	Trans-Cinnamaldehyde	C00903	HMDB0003441	C9H8O	132.058	133.065	131.05			5	60/40 water/ethanol	7	B6
559	2,6-Dihydroxypyridine	C03056	-	C5H5NO2	111.032	112.039	110.025	8.61	8.62	5	60/40 water/ethanol	7	B7
560	Vanillin	C00755	HMDB0012308	C8H8O3	152.047	153.055	151.04	4.62	4.97	5	60/40 water/ethanol	7	B8
561	Methyl Acetoacetate	CSID13874867	HMDB0000310	C5H8O3	116.047	117.055	115.04			5	60/40 water/ethanol	7	B9
562	Suberate	C08278	HMDB0000893	C8H14O4	174.089	175.097	173.082	10.14	10.915	5	60/40 water/ethanol	7	B10
563	Adipate	C06104	HMDB0000448	C6H10O4	146.058	147.065	145.051	11.19	12.13	5	Water	7	B11
564	Metanephrine	C05588	HMDB0004063	C10H15NO3	197.105	198.112	196.098	14.38		5	60/40 water/ethanol	7	B12
565	N-Acetyl-L-leucine	C02710	HMDB0011756	C8H15NO3	173.105	174.112	172.098	4.7	4.835	5	60/40 water/ethanol	7	C1
566	2',4'-Dihydroxyacetophenone	C03663	HMDB0029659	C8H8O3	152.047	153.055	151.04	4.53	4.89	5	60/40 water/ethanol	7	C2
567	Benzyl Alcohol	C03485	HMDB0003119	C7H8O	108.058	109.065	107.05			5	60/40 water/ethanol	7	C3
568	Monomethylglutarate	CSID66550	HMDB0000858	C6H10O4	146.058	147.065	145.051	4.7		5	60/40 water/ethanol	7	C4
569	Indole-3-Methyl Acetate	C20635	HMDB0029738	C11H11NO2	189.079	190.086	188.072	4.07	4.43	5	60/40 water/ethanol	7	C5
570	Mevalonate	C00418	HMDB0000227	C6H12O4	148.074	149.081	147.066	7.45	7.23	5	Water	7	C6
571	3-Methoxy-4-Hydroxymandelate	C05584	HMDB0000291	C9H10O5	198.053	199.06	197.046	7.37	8.71	5	60/40 water/ethanol	7	C7
572	Homovanillate	C05582	HMDB0000118	C9H10O4	182.058	183.065	181.051	7.47	7.74	5	60/40 water/ethanol	7	C8
573	2-Methylmaleate	C02226	HMDB0000634	C5H6O4	130.027	131.034	129.019	6.17	8.92	5	60/40 water/ethanol	7	C9
574	1-Phenylethanol	C07112	HMDB0032619	C8H10O	122.073	123.08	121.066			5	60/40 water/ethanol	7	C10
575	Salsolinol	C09642	HMDB0042012	C10H13NO2	179.095	180.102	178.087			5	60/40 water/ethanol	7	C11
576	Salicylamide	D01811	HMDB0015687	C7H7NO2	137.048	138.055	136.04	4.92	5.62	5	60/40 water/ethanol	7	C12
577	Oxoglutarate	C00026	HMDB0000208	C5H6O5	146.022	147.029	145.014	11.43	13.31	5	60/40 water/ethanol	7	D1
578	Ethyl 3-Indoleacetate	CSID12523	HMDB0304946	C12H13NO2	203.095	204.102	202.087	3.98	4.34	5	60/40 water/ethanol	7	D2
579	Tetrahydrocortisol	C05472	HMDB0000949	C21H34O5	366.241	367.248	365.233	4.58		5	60/40 water/ethanol	7	D3
580	N,N-Dimethyl-1,4-Phenylenediamine	C04203	HMDB0247696	C8H12N2	136.1	137.107	135.093	4.84		5	60/40 water/ethanol	7	D4
581	Homogentisate	C01161	HMDB0001336	C8H8O4	168.042	169.049	167.035			5	Water	7	D5
582	Indoleacetaldehyde	C00637	HMDB0001190	C10H9NO	159.068	160.076	158.061	4.23	4.63	5	60/40 water/ethanol	7	D6
583	4-Hydroxy-3-Methoxyphenylglycol	C05594	HMDB0001490	C9H12O4	184.074	185.081	183.066	6.075	6.29	5	60/40 water/ethanol	7	D7
584	3-Hydroxyphenylacetate	C05593	HMDB0000440	C8H8O3	152.047	153.055	151.04	7.68	8.75	5	60/40 water/ethanol	7	D8
585	4-Methylcatechol	C06730	HMDB0000873	C7H8O2	124.052	125.06	123.045	7.04	9.08	5	60/40 water/ethanol	7	D9
586	Pyridoxal	C00250	HMDB0001545	C8H9NO3	167.058	168.066	166.051	8	6.94	5	60/40 water/ethanol	7	D10
587	Salicylate	C00805	HMDB0001895	C7H6O3	138.032	139.039	137.024	4.4	4.91	5	60/40 water/ethanol	7	D11
588	Sebacate	C08277	HMDB0000792	C10H18O4	202.121	203.128	201.113	4.71	9.37	5	60/40 water/ethanol	7	D12
589	3-Methyl-2-Oxindole	C02366	HMDB0304943	C9H9NO	147.068	148.076	146.061	4.4	4.915	5	60/40 water/ethanol	7	E1
590	3-Methyladenine	C00913	HMDB0011600	C6H7N5	149.07	150.077	148.063	9.18	8.14	5	60/40 water/ethanol	7	E2
591	Hydroxyphenyllactate	C03672	HMDB0000755	C9H10O4	182.058	183.065	181.051	6.97	8.61	5	60/40 water/ethanol	7	E3
592	Biotin (B7)	C00120	HMDB0000030	C10H16N2O3S	244.088	245.095	243.081	8.64	7.915	5	60/40 water/ethanol	7	E4
593	5-Methoxyindoleacetate	C05660	HMDB0004096	C11H11NO3	205.074	206.081	204.067	7	7.14	5	60/40 water/ethanol	7	E5
594	Pyruvaldehyde	C00546	HMDB0001167	C3H4O2	72.0211	73.0284	71.0138			5	60/40 water/ethanol	7	E6
595	Pyrrole-2-Carboxylate	C05942	HMDB0004230	C5H5NO2	111.032	112.039	110.025	7.83	8.95	5	60/40 water/ethanol	7	E7
596	5-Hydroxyindoleacetate	C05635	HMDB0000763	C10H9NO3	191.058	192.066	190.051	10.94	11.95	5	60/40 water/ethanol	7	E8
597	3-Methylglutaconate	CID1267861	HMDB0000522	C6H8O4	144.042	145.05	143.035	9.94	11.5	5	60/40 water/ethanol	7	E9
598	Resorcinol Monoacetate	C12064	HMDB0257165	C8H8O3	152.047	153.055	151.04	4.29	4.91	5	60/40 water/ethanol	7	E10
599	Acetoacetate	C00164	HMDB0000060	C4H6O3	102.032	103.039	101.024	5.01		5	Water	7	E11
600	Acetylphosphate	C00227	HMDB0001494	C2H5O5P	139.987	140.995	138.98			5	60/40 water/ethanol	7	E12
601	Sorbose	C00247	HMDB0001266	C6H12O6	180.063	181.071	179.056	12.16	13.78	5	Water	7	F1
602	Xylitol	C00379	HMDB0002917	C5H12O5	152.068	153.076	151.061	11.58	11.475	5	Water	7	F2
603	Ribitol	C00474	HMDB0000508	C5H12O5	152.068	153.076	151.061	11.66	11.475	5	Water	7	F3
604	Myoinositol	C00137	HMDB0000211	C6H12O6	180.063	181.071	179.056	13.76	13.78	5	Water	7	F4
605	Mannose	C00159	HMDB0000169	C6H12O6	180.063	181.071	179.056	12.27	13.78	5	Water	7	F5
606	Xylose	C00181	HMDB0000098	C5H10O5	150.053	151.06	149.046			5	Water	7	F6
607	Sucrose	C00089	HMDB0000258	C12H22O11	342.116	343.124	341.109	12.9	12.61	5	Water	7	F7
608	Galactose	C00124	HMDB0000143	C6H12O6	180.063	181.071	179.056	12.62	13.78	5	Water	7	F8
609	D-Glucose	C00031	HMDB0003345	C6H12O6	180.063	181.071	179.056	12.61	13.78	5	Water	7	F9
610	Allose	C01487	HMDB0001151	C6H12O6	180.063	181.071	179.056	12.1	13.78	5	Water	7	F10
611	Mannitol	C00392	HMDB0000765	C6H14O6	182.079	183.086	181.072		12.095	5	Water	7	F11
612	Melibiose	C05402	HMDB0000048	C12H22O11	342.116	343.124	341.109	13.42	12.61	5	Water	7	F12
613	Sorbitol	C00749	HMDB0000247	C6H14O6	182.079	183.086	181.072	12.17	12.055	5	Water	7	G1
614	Maltose	C00208	HMDB0000163	C12H22O11	342.116	343.124	341.109	13.2	12.61	5	Water	7	G2
615	Tagatose	C00795	HMDB0003418	C6H12O6	180.063	181.071	179.056	11.8		5	Water	7	G3
616	L-Gulonolactone	C05410	-	C6H10O6	178.048	179.055	177.04	11.28	11.665	5	Water	7	G4
617	Arabinose	C00216	HMDB0029942	C5H10O5	150.053	151.06	149.046			5	Water	7	G5
618	Cellobiose	C06422	HMDB0000055	C12H22O11	342.116	343.124	341.109	13.1	12.61	5	Water	7	G6
619	Psicose	C06468	-	C6H12O6	180.063	181.071	179.056	11.17		5	Water	7	G7
620	Arabitol	C00532	HMDB0001851	C5H12O5	152.068	153.076	151.061	11.66	11.465	5	Water	7	G8
621	Lyxose	C00476	-	C5H10O5	150.053	151.06	149.046	11.54		5	Water	7	G9
622	Ribose	C00121	-	C5H10O5	150.053	151.06	149.046			5	Water	7	G10
623	Palatinose	C01742	-	C12H22O11	342.116	343.124	341.109	12.89	12.61	5	Water	7	G11
624	D-Pinitol	C03844	HMDB0034219	C7H14O6	194.079	195.086	193.072	11.76	11.565	5	Water	7	G12
625	Asiatate	C08617	NA	C30H48O5	488.35	489.357	487.343	4.14		5	Ethanol	8	A1
626	2-Undecanone	C01875	HMDB0033713	C11H22O	170.167	171.174	169.16			5	Ethanol	8	A2
627	Bornyl Acetate	C09837	HMDB0040397	C12H20O2	196.146	197.154	195.139			5	Ethanol	8	A3
628	Lipoamide	C00248	HMDB0000962	C8H15NOS2	205.06	206.067	204.052	4.33	4.88	5	Ethanol	8	A4
629	Genistein	C06563	HMDB0003217	C15H10O5	270.053	271.06	269.046	5.2	5.605	5	Ethanol	8	A5
630	Naringenin	C00509	HMDB0002670	C15H12O5	272.068	273.076	271.061	4.34	4.86	5	Ethanol	8	A6
631	Catechin	C14079	HMDB0037953	C15H14O6	290.079	291.086	289.072	9.6	11.08	5	Ethanol	8	A7
632	Epigallocatechin	C12136	HMDB0038361	C15H14O7	306.074	307.081	305.067			5	Ethanol	8	A8
633	Carnosic Acid	CSID400886	HMDB0002358	C20H28O4	332.199	333.206	331.191	3.53	3.625	5	Ethanol	8	A9
634	Rotenone	C07593	HMDB0034436	C23H22O6	394.142	395.149	393.134	3.77		5	Ethanol	8	A10
635	Epicatechin Gallate	CSID97034	HMDB0037944	C22H18O10	442.09	443.097	441.083			5	Ethanol	8	A11
636	Narirutin	C09793	HMDB0033740	C27H32O14	580.179	581.187	579.172	6.91		5	Ethanol	8	A12
637	Limonene	C00521	HMDB0004321	C10H16	136.125	137.133	135.118	3.65	3.92	5	Ethanol	8	B1
638	Stachydrine	C10172	HMDB0004827	C7H13NO2	143.095	144.102	142.087	11.28	9.88	5	Ethanol	8	B2
639	1,3,5-Trimethoxybenzene	D01792	HMDB0059963	C9H12O3	168.079	169.086	167.071	4.32	4.105	5	Ethanol	8	B3
640	10-Undecen-1-ol	CSID7893	HMDB0031016	C11H22O	170.167	171.174	169.16			5	Ethanol	8	B4
641	Lipoic Acid	C16241	HMDB0001451	C8H14O2S2	206.044	207.051	205.036	4.47	4.39	5	Ethanol	8	B5
642	Alpha-Bisabolol	C09621	HMDB0036197	C15H26O	222.198	223.206	221.191			5	Ethanol	8	B6
643	1′-Acetoxychavicol Acetate	CSID354584	HMDB0041005	C13H14O4	234.089	235.097	233.082	3.74	3.94	5	Ethanol	8	B7
644	Abscisate	C06082	HMDB0035140	C15H20O4	264.136	265.143	263.129	4.27	4.18	5	Ethanol	8	B8
645	Glabridin	C10421	HMDB0034188	C20H20O4	324.136	325.143	323.129	3.94	4.365	5	Ethanol	8	B9
646	Matairesinol	C10682	HMDB0035698	C20H22O6	358.142	359.149	357.134	4.04	4.29	5	Ethanol	8	B10
647	Epigallocatechin-3-Gallate	C09731	HMDB0003153	C22H18O11	458.085	459.092	457.078			5	Ethanol	8	B11
648	Gossypol	C07667	HMDB0040723	C30H30O8	518.194	519.201	517.187	3.51		5	Ethanol	8	B12
649	2-Pyrrolidinone	C11118	HMDB0002039	C4H7NO	85.0528	86.0601	84.0455			5	Ethanol	8	C1
650	2-Hexenal	C08497	HMDB0031496	C6H10O	98.0732	99.0805	97.0659			5	Ethanol	8	C2
651	1-Phenylethylamine	C02455	HMDB0002017	C8H11N	121.089	122.096	120.082			5	Ethanol	8	C3
652	2-Butylfuran	CSID19338	HMDB0040272	C8H12O	124.089	125.096	123.082			5	Ethanol	8	C4
653	2-Octanone	CSID7802	HMDB0031294	C8H16O	128.12	129.127	127.113	6.21		5	Ethanol	8	C5
654	1-Methylnaphthalene	C14082	HMDB0032860	C11H10	142.078	143.086	141.071			5	Ethanol	8	C6
655	1-Furfurylpyrrole	CSID14312	HMDB0030204	C9H9NO	147.068	148.076	146.061			5	Ethanol	8	C7
656	1-Methoxy-4-(2-Propenyl)Benzene	C10452	HMDB0034121	C10H12O	148.089	149.096	147.082	3.85	3.97	5	Ethanol	8	C8
657	3-(Dimethylaminomethyl)Indole	C08304	HMDB0035762	C11H14N2	174.116	175.123	173.108	12.67		5	Ethanol	8	C9
658	2-Tridecanone	CSID11132	HMDB0034148	C13H26O	198.198	199.206	197.191			5	Ethanol	8	C10
659	3,3',4'5-Tetrahydroxystilbene	C05901	HMDB0004215	C14H12O4	244.074	245.081	243.066	6.6	7.335	5	Ethanol	8	C11
660	3,3',4',7-Tetrahydroxyflavone	C10041	HMDB0029492	C16H12O6	300.063	301.071	299.056			5	Ethanol	8	C12
661	Alpha-Phellandrene	C09875	HMDB0035850	C10H16	136.125	137.133	135.118			5	Ethanol	8	D1
662	3-Indoleacetonitrile	C02938	HMDB0006524	C10H8N2	156.069	157.076	155.061	4.1	4.6	5	Ethanol	8	D2
663	3-Methylsulfinylpropyl Isothiocyanate	CSID10023	HMDB0006095	C5H9NOS2	163.013	164.02	162.005	4.51	4.825	5	Ethanol	8	D3
664	3,4-Dihydroxyhydrocinnamate	C10447	HMDB0000423	C9H10O4	182.058	183.065	181.051	9.47	10.3	5	Ethanol	8	D4
665	7-Isopropyl-1,4-Dimethylazulene	C09675	HMDB0036648	C15H18	198.141	199.148	197.134	4.51	4.72	5	Ethanol	8	D5
666	3-Indolebutyrate	C11284	HMDB0002096	C12H13NO2	203.095	204.102	202.087	6.58	6.52	5	Ethanol	8	D6
667	3,3'-Dithiobis[2-Methylfuran]	CSID526624	HMDB0040201	C10H10O2S2	226.012	227.02	225.005	14.37		5	Ethanol	8	D7
668	3-Methylcyclopentadecanone	CSID10483	HMDB0034181	C16H30O	238.23	239.237	237.222			5	Ethanol	8	D8
669	5,7-Dihydroxyflavone	C10028	HMDB0036619	C15H10O4	254.058	255.065	253.051	4.12	4.605	5	Ethanol	8	D9
670	Rhein	C10401	HMDB0032876	C15H8O6	284.032	285.039	283.025	4.04	4.345	5	Ethanol	8	D10
671	6beta-Hydroxyasiatate	CSID227128	HMDB0036670	C30H48O6	504.345	505.352	503.338	4.5		5	Ethanol	8	D11
672	4,5-Di-O-Caffeoylquinate	CSID4976335	HMDB0030707	C25H24O12	516.127	517.134	515.119	4.61		5	Ethanol	8	D12
673	Acetophenone	C07113	HMDB0033910	C8H8O	120.058	121.065	119.05	6.76	6.63	5	Ethanol	8	E1
674	Alpha-Terpinene	C09898	HMDB0036995	C10H16	136.125	137.133	135.118	3.59	4.02	5	Ethanol	8	E2
675	D-Linalool	C11389	HMDB0036102	C10H18O	154.136	155.143	153.128			5	Ethanol	8	E3
676	Acetylsalicylic acid	C01405	HMDB0001879	C9H8O4	180.042	181.05	179.035	3.59	3.87	5	Ethanol	8	E4
677	Beta-Elemene	C17094	HMDB0061848	C15H24	204.188	205.195	203.181			5	Ethanol	8	E5
678	Bergapten	C01557	HMDB0030637	C12H8O4	216.042	217.05	215.035	4.03	5.14	5	Ethanol	8	E6
679	Apigenin	C01477	HMDB0002124	C15H10O5	270.053	271.06	269.046	5.86	5.435	5	Ethanol	8	E7
680	Atropine	C01479	HMDB0014712	C17H23NO3	289.168	290.175	288.16	11.4	13.61	5	Ethanol	8	E8
681	Boldine	C09365	HMDB0039085	C19H21NO4	327.147	328.154	326.14	6.18	5.42	5	Ethanol	8	E9
682	Alpha-Mangostin	C10080	HMDB0035796	C24H26O6	410.173	411.18	409.166	3.69		5	Ethanol	8	E10
683	Baicalin	C10025	HMDB0041832	C21H18O11	446.085	447.092	445.078	4.62		5	Ethanol	8	E11
684	Agnuside	C09765	HMDB0036561	C22H26O11	466.148	467.155	465.14	6.86		5	Ethanol	8	E12
685	Cinnamyl Alcohol	C02394	HMDB0029697	C9H10O	134.073	135.08	133.066	3.87	4.095	5	Ethanol	8	F1
686	Diallyl disulfide	C08369	HMDB0033966	C6H10S2	146.022	147.03	145.015			5	Ethanol	8	F2
687	Carvone	C11383	HMDB0004487	C10H14O	150.104	151.112	149.097			5	Water	8	F3
688	Camphor	C00808	HMDB0059838	C10H16O	152.12	153.127	151.113	3.87	4.19	5	Ethanol	8	F4
689	Eucalyptol	C09844	HMDB0004472	C10H18O	154.136	155.143	153.128			5	Ethanol	8	F5
690	Cassiastearoptene	CSID556589	HMDB0033830	C10H10O2	162.068	163.075	161.061	3.79	3.99	5	Ethanol	8	F6
691	Biochanin A	C00814	HMDB0002338	C16H12O5	284.068	285.076	283.061	3.96	4.425	5	Ethanol	8	F7
692	Capsaicin	C06866	HMDB0002227	C18H27NO3	305.199	306.206	304.192	3.87	4.16	5	Ethanol	8	F8
693	Bilobalide	C07605	HMDB0036735	C15H18O8	326.1	327.107	325.093	4.18	4.56	5	Ethanol	8	F9
694	Chlorogenic Acid	C00852	HMDB0003164	C16H18O9	354.095	355.102	353.088		9.395	5	Ethanol	8	F10
695	Arctigenin	C10545	HMDB0030087	C21H24O6	372.157	373.165	371.15	3.96	4.25	5	Ethanol	8	F11
696	Corilagin	C10219	HMDB0031457	C27H22O18	634.081	635.088	633.073	3.44		5	Ethanol	8	F12
697	Camphene	C06076	HMDB0059839	C10H16	136.125	137.133	135.118	3.75	4.02	5	Ethanol	8	G1
698	Cyclohexaneacetate	CSID20080	HMDB0031403	C8H14O2	142.099	143.107	141.092			5	Ethanol	8	G2
699	Coumarin	C05851	HMDB0001218	C9H6O2	146.037	147.044	145.029	3.97	4.475	5	Ethanol	8	G3
700	D-Citronellol	C09849	HMDB0035093	C10H20O	156.151	157.159	155.144			5	Ethanol	8	G4
701	Delta-Decalactone	CSID12282	HMDB0037116	C10H18O2	170.131	171.138	169.123	3.65	3.61	5	Ethanol	8	G5
702	Curcumol	CSID2797480	HMDB0038122	C15H24O2	236.178	237.185	235.17			5	Ethanol	8	G6
703	Daidzein	C10208	HMDB0003312	C15H10O4	254.058	255.065	253.051	6.25	5.72	5	Ethanol	8	G7
704	Delphinidin	C05908	NA	C15H11O7	303.05	304.057	302.043			5	Ethanol	8	G8
705	Dihydrocapsaicin	C16952	HMDB0038457	C18H29NO3	307.215	308.222	306.207	3.85	4.19	5	Ethanol	8	G9
706	Cryptochlorogenate	CSID22912773	HMDB0030653	C16H18O9	354.095	355.102	353.088		8.8	5	Ethanol	8	G10
707	Curcumin	C10443	HMDB0002269	C21H20O6	368.126	369.133	367.119	3.9	4.375	5	Ethanol	8	G11
708	Daidzin	C10216	HMDB0033991	C21H20O9	416.111	417.118	415.103	6.72		5	Ethanol	8	G12
709	Gamma-Terpinene	C09900	HMDB0005806	C10H16	136.125	137.133	135.118	3.53	3.94	5	Ethanol	8	H1
710	Benzyl Isothiocyanate	C03098	HMDB0033969	C8H7NS	149.03	150.037	148.023			5	Ethanol	8	H2
711	Geraniol	C09871	HMDB0005812	C10H18O	154.136	155.143	153.128			5	Ethanol	8	H3
712	Eugenol	C10453	HMDB0005809	C10H12O2	164.084	165.091	163.076		4.035	5	Ethanol	8	H4
713	Flavone	C15608	HMDB0003075	C15H10O2	222.068	223.075	221.061	4.03	5.19	5	Ethanol	8	H5
714	Costunolide	C09382	HMDB0036688	C15H20O2	232.146	233.154	231.139	3.91	4.32	5	Ethanol	8	H6
715	Farnesyl Acetate	CSID554014	HMDB0240268	C17H28O2	264.209	265.216	263.202			5	Ethanol	8	H7
716	Emodin	C10343	HMDB0035214	C15H10O5	270.053	271.06	269.046	3.77	3.945	5	Ethanol	8	H8
717	Gamma-Glutamylphenylalanine	CSID99868	HMDB0000594	C14H18N2O5	294.122	295.129	293.114	9.83	10.105	5	Ethanol	8	H9
718	Diosmetin	C10038	HMDB0029676	C16H12O6	300.063	301.071	299.056	4.35	4.845	5	Ethanol	8	H10
719	Diosgenin	C08898	NA	C27H42O3	414.313	415.321	413.306	3.71		5	Ethanol	8	H11
720	Ganoderate A	CSID413668	HMDB0034931	C30H44O7	516.309	517.316	515.301	3.97		5	Ethanol	8	H12
721	Indole-3-Carbinol	CSID3581	HMDB0005785	C9H9NO	147.068	148.076	146.061			5	Ethanol	9	A1
722	Hydrocinnamic Acid	C05629	HMDB0000764	C9H10O2	150.068	151.075	149.061	3.81	4	5	Ethanol	9	A2
723	Hydroxytyrosol	CSID74680	HMDB0005784	C8H10O3	154.063	155.07	153.056	6.66	6.79	5	Ethanol	9	A3
724	trans-4-Hydroxycinnamic acid	C12621	HMDB0001713	C9H8O3	164.047	165.055	163.04	6.61	7.075	5	Ethanol	9	A4
725	Harmaline	C06536	HMDB0030310	C13H14N2O	214.111	215.118	213.103	9.74	7.03	5	Ethanol	9	A5
726	Imperatorin	C09269	HMDB0034376	C16H14O4	270.089	271.097	269.082	3.89	4.255	5	Ethanol	9	A6
727	Gingerol	C10462	HMDB0005783	C17H26O4	294.183	295.19	293.176	3.93	4.19	5	Ethanol	9	A7
728	Glycerol Tributyrate	C13870	HMDB0031094	C15H26O6	302.173	303.18	301.166			5	Ethanol	9	A8
729	Ginkgolate	C10794	HMDB0033897	C22H34O3	346.251	347.258	345.243	3.45	3.54	5	Ethanol	9	A9
730	Glycyrrhetinate	C02283	HMDB0011628	C30H46O4	470.34	471.347	469.332	3.74		5	Ethanol	9	A10
731	Hesperetin 7-Neohesperidoside	C09806	HMDB0030748	C28H34O15	610.19	611.197	609.182	6.79		5	Ethanol	9	A11
732	Hypoletin 8-Gentiobioside	C08902	HMDB0038824	C27H30O17	626.148	627.156	625.141			5	Ethanol	9	A12
733	Menthol	C00400	HMDB0003352	C10H20O	156.151	157.159	155.144			5	Ethanol	9	B1
734	Methyl Cinnamate	C06358	HMDB0033833	C10H10O2	162.068	163.075	161.061	3.8	3.92	5	Ethanol	9	B2
735	Isoeugenol	C10469	HMDB0005802	C10H12O2	164.084	165.091	163.076	3.6		5	Ethanol	9	B3
736	Menadione	C05377	HMDB0001892	C11H8O2	172.052	173.06	171.045	3.42	3.77	5	Ethanol	9	B4
737	Isoliquiritigenin	C08650	HMDB0037316	C15H12O4	256.074	257.081	255.066	4.57	4.82	5	Ethanol	9	B5
738	Octadecanol	D01924	HMDB0002350	C18H38O	270.292	271.3	269.285			5	Ethanol	9	B6
739	Indole-3-acetyl-aspartate	CSID3845644	HMDB0038666	C14H14N2O5	290.09	291.098	289.083	10.38	12.11	5	Ethanol	9	B7
740	Hesperetin	C01709	HMDB0005782	C16H14O6	302.079	303.086	301.072	4.24	4.69	5	Ethanol	9	B8
741	Isoxanthohumol B	CSID35013938	HMDB0035499	C21H22O6	370.142	371.149	369.134	4.17	4.255	5	Ethanol	9	B9
742	Luteolin-7-Glucoside	C03951	HMDB0035588	C21H20O11	448.101	449.108	447.093			5	Ethanol	9	B10
743	Limonin	C03514	HMDB0035921	C26H30O8	470.194	471.201	469.187	3.89		5	Ethanol	9	B11
744	Madecassoside	CSID142124	HMDB0040122	C48H78O20	974.509	975.516	973.501	9.34		5	Ethanol	9	B12
745	p-Cymene	C06575	HMDB0005805	C10H14	134.11	135.117	133.102			5	Ethanol	9	C1
746	Nornicotine	C06524	HMDB0001126	C9H12N2	148.1	149.107	147.093			5	Ethanol	9	C2
747	Methylparaben	D01400	HMDB0032572	C8H8O3	152.047	153.055	151.04	4.26	4.74	5	Ethanol	9	C3
748	Methyleugenol	C10454	HMDB0031864	C11H14O2	178.099	179.107	177.092			5	Ethanol	9	C4
749	Methyl Jasmonate	C11512	HMDB0036583	C13H20O3	224.141	225.149	223.134			5	Ethanol	9	C5
750	Norizalpinin	C10044	HMDB0029521	C15H10O5	270.053	271.06	269.046	4.11	4.71	5	Ethanol	9	C6
751	Kaempferol	C05903	HMDB0005801	C15H10O6	286.048	287.055	285.04	5.87	5.69	5	Ethanol	9	C7
752	Myricetin	C10107	HMDB0002755	C15H10O8	318.038	319.045	317.03			5	Ethanol	9	C8
753	Neochlorogenate	C17147	HMDB0040690	C16H18O9	354.095	355.102	353.088		9.87	5	Ethanol	9	C9
754	Nobiletin	C10112	HMDB0029540	C21H22O8	402.131	403.139	401.124	3.87	4.12	5	Ethanol	9	C10
755	Oleanolate	C17148	HMDB0002364	C30H48O3	456.36	457.368	455.353	3.67		5	Ethanol	9	C11
756	Oleuropein	C09794	HMDB0035872	C25H32O13	540.184	541.192	539.177	6.74		5	Ethanol	9	C12
757	Pyrogallol	C01108	HMDB0013674	C6H6O3	126.032	127.039	125.024	3.75	4	5	Ethanol	9	D1
758	Pulegone	C09893	HMDB0035604	C10H16O	152.12	153.127	151.113			5	Ethanol	9	D2
759	Protocatechuate	C00230	HMDB0001856	C7H6O4	154.027	155.034	153.019	11.39	12.69	5	Ethanol	9	D3
760	Sphingosine	C00319	HMDB0000252	C18H37NO2	299.282	300.29	298.275	4.36	6.2	5	Ethanol	9	D4
761	Phthalate	C01606	HMDB0002107	C8H6O4	166.027	167.034	165.019	9.99	12.05	5	Ethanol	9	D5
762	Resveratrol	C03582	HMDB0003747	C14H12O3	228.079	229.086	227.071	6.52	6.52	5	Ethanol	9	D6
763	Piperine	C03882	HMDB0029377	C17H19NO3	285.136	286.144	284.129	3.9	4.38	5	Ethanol	9	D7
764	Quinine	C06526	HMDB0014611	C20H24N2O2	324.184	325.191	323.176	6.68	7.445	5	Ethanol	9	D8
765	Puerarin	C10524	HMDB0240265	C21H20O9	416.111	417.118	415.103	9.11		5	Ethanol	9	D9
766	Quercitrin	C01750	HMDB0033751	C21H20O11	448.101	449.108	447.093			5	Ethanol	9	D10
767	Quercetin 3-O-glucuronide	CSID10176995	HMDB0029212	C21H18O13	478.075	479.082	477.067			5	Ethanol	9	D11
768	Rutin	C05625	HMDB0003249	C27H30O16	610.153	611.161	609.146	10.47		5	Ethanol	9	D12
769	Terpinolene	C06075	HMDB0036994	C10H16	136.125	137.133	135.118	3.59	3.94	5	Ethanol	9	E1
770	Thymol	C09908	HMDB0001878	C10H14O	150.104	151.112	149.097			5	Ethanol	9	E2
771	P-Octopamine	C04227	HMDB0004825	C8H11NO2	153.079	154.086	152.072	14.51		5	Ethanol	9	E3
772	Sulforaphane	CSID5157	HMDB0005792	C6H11NOS2	177.028	178.036	176.021	4.4	4.745	5	Ethanol	9	E4
773	Scopoletin	C01752	HMDB0034344	C10H8O4	192.042	193.05	191.035	4.58	4.91	5	Ethanol	9	E5
774	Scoparone	C09311	HMDB0030818	C11H10O4	206.058	207.065	205.051	4.12	4.5	5	Ethanol	9	E6
775	Trans-Nerolidol	CSID8549	HMDB0035662	C15H26O	222.198	223.206	221.191			5	Ethanol	9	E7
776	Sclareol	C09183	HMDB0036827	C20H36O2	308.272	309.279	307.264	3.93	4.26	5	Ethanol	9	E8
777	Stigmastanol	CSID13078158	HMDB0000494	C29H52O	416.402	417.409	415.395			5	Ethanol	9	E9
778	Silibinin	C07610	HMDB0030583	C25H22O10	482.121	483.129	481.114			5	Ethanol	9	E10
779	Theaflavin	CSID102754	HMDB0005788	C29H24O12	564.127	565.134	563.119	9.78		5	Ethanol	9	E11
780	Secoisolariciresinol diglucoside	CSID8093627	HMDB0036323	C32H46O16	686.279	687.286	685.271	9.92		5	Ethanol	9	E12
781	Βeta-Pinene	C09882	HMDB0036560	C10H16	136.125	137.133	135.118	3.51	3.95	5	Ethanol	9	F1
782	Umbelliferone	C09315	HMDB0029865	C9H6O3	162.032	163.039	161.024	4.62	5.645	5	Ethanol	9	F2
783	Beta-Caryophyllene	C09629	HMDB0036792	C15H24	204.188	205.195	203.181			5	Ethanol	9	F3
784	Dihydrogenistein	C14458	HMDB0005897	C15H12O5	272.068	273.076	271.061	5.23	4.915	5	Ethanol	9	F4
785	Retinal	C00376	HMDB0001358	C20H28O	284.214	285.221	283.207			5	Ethanol	9	F5
786	Luteolin	C01514	HMDB0005800	C15H10O6	286.048	287.055	285.04	6.59	6.68	5	Ethanol	9	F6
787	Cholecalciferol (Vit D3)	C05443	HMDB0000876	C27H44O	384.339	385.347	383.332			5	Ethanol	9	F7
788	Ginkgolide A	C07601	HMDB0036862	C20H24O9	408.142	409.149	407.135	4.18		5	Ethanol	9	F8
789	Ginkgolide B	C07602	HMDB0036861	C20H24O10	424.137	425.144	423.13	4.17		5	Ethanol	9	F9
790	Ginkgolide C	C07603	HMDB0036860	C20H24O11	440.132	441.139	439.125	4.45		5	Ethanol	9	F10
791	Vitamin K1	C05850	HMDB0003555	C31H46O2	450.35	451.357	449.342			5	Ethanol	9	F11
792	Eriocitrin	C09732	HMDB0005811	C27H32O15	596.174	597.181	595.167	8.91		5	Ethanol	9	F12
793	Tetramethylpyrazine	CSID13658	HMDB0036584	C8H12N2	136.1	137.107	135.093	6.44		5	Ethanol	9	G1
794	Trans-Anethole	C10428	HMDB0030837	C10H12O	148.089	149.096	147.082			5	Ethanol	9	G2
795	Phenylacetylglutamine	C04148	HMDB0006344	C13H16N2O4	264.111	265.118	263.104	6.59	6.605	5	Ethanol	9	G3
796	Hispidulin	C10058	HMDB0128581	C16H12O6	300.063	301.071	299.056	5.84	4.9	5	Ethanol	9	G4
797	Quercetin	C00389	HMDB0005794	C15H10O7	302.043	303.05	301.035	6.58	7.06	5	Ethanol	9	G5
798	Gallocatechin	C12127	HMDB0038365	C15H14O7	306.074	307.081	305.067			5	Ethanol	9	G6
799	Casticin	CSID4474632	HMDB0030660	C19H18O8	374.1	375.107	373.093	3.95	4.295	5	Ethanol	9	G7
800	Celastrol	CSID63959	HMDB0002385	C29H38O4	450.277	451.284	449.27	3.81		5	Ethanol	9	G8
801	Astaxanthin	C08580	HMDB0002204	C40H52O4	596.387	597.394	595.379			5	Ethanol	9	G9
802	Hesperidine	C09755	HMDB0003265	C28H34O15	610.19	611.197	609.182	6.82		5	Ethanol	9	G10
803	Acteoside	C10501	HMDB0034843	C29H36O15	624.205	625.213	623.198	10.03	10	5	Ethanol	9	G11
804	Melatonin	C01598	HMDB0001389	C13H16N2O2	232.121	233.128	231.114	4.43	4.69	5	Ethanol	9	G12
805	2-Furancarboxaldehyde	C14279	HMDB0032914	C5H4O2	96.0211	97.0284	95.0138			5	Water	10	A1
806	cis-3-Hexen-1-ol	C08492	HMDB0030003	C6H12O	100.089	101.096	99.0815			5	Water	10	A2
807	2-Furoate	C01546	HMDB0000617	C5H4O3	112.016	113.023	111.009			5	Water	10	A3
808	2-Ethylbutyrate	CSID6649	HMDB0031221	C6H12O2	116.084	117.091	115.076			5	Water	10	A4
809	2,4-Dihydroxybutanoate	CSID167259	HMDB0000360	C4H8O4	120.042	121.05	119.035	9.22	9.9	5	Water	10	A5
810	2-Acetylpyrazine	CSID28682	HMDB0031861	C6H6N2O	122.048	123.055	121.041			5	Water	10	A6
811	2-Hydroxyphenethylamine	C02735	HMDB0001065	C8H11NO	137.084	138.091	136.077	11.17	10.57	5	Water	10	A7
812	1,5-Anhydrosorbitol	C07326	HMDB0002712	C6H12O5	164.068	165.076	163.061	11.08	10.97	5	Water	10	A8
813	Alliin	C08265	HMDB0033592	C6H11NO3S	177.046	178.053	176.039	9.43	9.015	5	Water	10	A9
814	2-Keto-D-gluconate	C03342	HMDB0011732	C6H10O7	194.043	195.05	193.035	11.08	12.37	5	Water	10	A10
815	Suberylglycine	CSID4956295	HMDB0000953	C10H17NO5	231.111	232.118	230.103	9.85	10.62	5	Water	10	A11
816	Sinigrin	C08427	HMDB0034070	C10H17NO9S2	359.034	360.042	358.027	9.75	12.75	5	Water	10	A12
817	2-Methyl-1-butanol	CSID8398	HMDB0031527	C5H12O	88.0888	89.0961	87.0815			5	Water	10	B1
818	2-Methyltetrahydrofuran-3-one	CSID17494	HMDB0031178	C5H8O2	100.052	101.06	99.0451			5	Water	10	B2
819	3-Hydroxyisobutyrate	C01188	HMDB0000336	C4H8O3	104.047	105.055	103.04	8.48	8.91	5	Water	10	B3
820	3-Furoate	CSID9849	HMDB0000444	C5H4O3	112.016	113.023	111.009			5	Water	10	B4
821	2-Methyl-2-Pentenoate	CSID4940988	HMDB0031560	C6H10O2	114.068	115.075	113.061			5	Water	10	B5
822	2-Methylmalonate	C02170	HMDB0000202	C4H6O4	118.027	119.034	117.019	10.92	12.51	5	Water	10	B6
823	2-Picolinate	C10164	HMDB0002243	C6H5NO2	123.032	124.039	122.025			5	Water	10	B7
824	Dihydrothymine	C00906	HMDB0000079	C5H8N2O2	128.059	129.066	127.051	9.61	9.99	5	Water	10	B8
825	3,4-Dihydroxybenzaldehyde	C16700	HMDB0059965	C7H6O3	138.032	139.039	137.024		6.385	5	Water	10	B9
826	3,5-Dihydroxybenzoate	CSID7146	HMDB0013677	C7H6O4	154.027	155.034	153.019	10.64	12.66	5	Water	10	B10
827	3-(3,4-Dihydroxyphenyl)Lactate	C01207	HMDB0003503	C9H10O5	198.053	199.06	197.046	9.75	11.14	5	Water	10	B11
828	3,4,5-Trimethoxycinnamate	CSID642910	HMDB0002511	C12H14O5	238.084	239.091	237.077	4.4	4.23	5	Water	10	B12
829	Acrylamide	C01659	HMDB0004296	C3H5NO	71.0371	72.0444	70.0298			5	Water	10	C1
830	3-Aminoisobutanoate	C05145	HMDB0003911	C4H9NO2	103.063	104.071	102.056	12.65	12.14	5	Water	10	C2
831	3-Hydroxyvalerate	CSID96952	HMDB0000531	C5H10O3	118.063	119.07	117.056	4.53		5	Water	10	C3
832	3-Methylthiopropionate	C08276	HMDB0001527	C4H8O2S	120.025	121.032	119.017			5	Water	10	C4
833	4-Hydroxy-3-Methylbenzoate	C21167	HMDB0004815	C8H8O3	152.047	153.055	151.04	7.35	8.44	5	Water	10	C5
834	Arecoline	C10129	HMDB0030353	C8H13NO2	155.095	156.102	154.087	5.39	5.05	5	Water	10	C6
835	4,5-Dihydroorotate	C00337	HMDB0000528	C5H6N2O4	158.033	159.04	157.025	9.1	10.285	5	Water	10	C7
836	3-Methylxanthine	C16357	HMDB0001886	C6H6N4O2	166.049	167.056	165.042	7.23	7.525	5	Water	10	C8
837	5-Methoxysalicylate	CSID68296	HMDB0001868	C8H8O4	168.042	169.05	167.035	4.24	4.52	5	Water	10	C9
838	D-Glucurono-6,3-Lactone	C02670	HMDB0006355	C6H8O6	176.032	177.039	175.025	9.74	10.46	5	Water	10	C10
839	Arbutin	C06186	HMDB0029943	C12H16O7	272.09	273.097	271.082	9.68	9.69	5	Water	10	C11
840	Amygdalin	C08325	HMDB0035030	C20H27NO11	457.158	458.166	456.151	9.04		5	Water	10	C12
841	Cyclohexanone	C00414	HMDB0003315	C6H10O	98.0732	99.0805	97.0659			5	Water	10	D1
842	2-Methyl-3-Pentanone	CSID10791	HMDB0005846	C6H12O	100.089	101.096	99.0815			5	Water	10	D2
843	3-Hydroxyisovalerate	CSID62571	HMDB0000754	C5H10O3	118.063	119.07	117.056	4.54		5	Water	10	D3
844	Cyclohexanecarboxylate	C089822	HMDB0031342	C7H12O2	128.084	129.091	127.076			5	Water	10	D4
845	Ethyl Acetoacetate	C03500	HMDB0031216	C6H10O3	130.063	131.07	129.056			5	Water	10	D5
846	Citramalate	C00815	HMDB0000426	C5H8O5	148.037	149.044	147.03	11.77	12.67	5	Water	10	D6
847	Alpha-Terpineol	C09902	HMDB0004043	C10H18O	154.136	155.143	153.128			5	Water	10	D7
848	Betonicine	C08269	HMDB0029412	C7H13NO3	159.09	160.097	158.082	11.76	10.99	5	Water	10	D8
849	Beta-Glycerophosphorate	C02979	HMDB0002520	C3H9O6P	172.014	173.021	171.006	11.26	12.235	5	Water	10	D9
850	Canavanine	C00308	HMDB0002706	C5H12N4O3	176.091	177.098	175.084	13.74	13.44	5	Water	10	D10
851	Ergothioneine	C05570	HMDB0003045	C9H15N3O2S	229.088	230.096	228.081	12.95	12.65	5	Water	10	D11
852	Deoxyinosine	C05512	HMDB0000071	C10H12N4O4	252.086	253.093	251.079	9.75	9.71	5	Water	10	D12
853	3-Hydroxycoumarin	CSID13061	HMDB0002149	C9H6O3	162.032	163.039	161.024			5	Water	10	E1
854	Hydroquinone	C00530	HMDB0002434	C6H6O2	110.037	111.044	109.029	6.06	6.33	5	Water	10	E2
855	Ethyl Pyruvate	CSID11544	HMDB0031643	C5H8O3	116.047	117.055	115.04			5	Water	10	E3
856	L-Allothreonine	C05519	HMDB0004041	C4H9NO3	119.058	120.066	118.051	12.56	12.24	5	Water	10	E4
857	Isonicotinate	C07446	HMDB0060665	C6H5NO2	123.032	124.039	122.025	7.03	6.5	5	Water	10	E5
858	Kojate	C14516	HMDB0032923	C6H6O4	142.027	143.034	141.019	8.25	7.01	5	Water	10	E6
859	Gentisate	C00628	HMDB0000152	C7H6O4	154.027	155.034	153.019	6.2	7.87	5	Water	10	E7
860	Galactonate	C00880	HMDB0000565	C6H12O7	196.058	197.066	195.051	11.27	12.27	5	Water	10	E8
861	Glucarate	C00818	HMDB0029881	C6H10O8	210.038	211.045	209.03	11.78	13.93	5	Water	10	E9
862	Glycerophosphocholine	C00670	HMDB0000086	C8H20NO6P	257.103	258.11	256.096	12.92	11.98	5	Water	10	E10
863	Geniposidate	C11673	HMDB0034942	C16H22O10	374.121	375.129	373.114	10.49	10.77	5	Water	10	E11
864	Flavin Mononucleotide	C00061	HMDB0001520	C17H21N4O9P	456.105	457.112	455.097	9.93		5	Water	10	E12
865	Levulinate	CSID11091	HMDB0000720	C5H8O3	116.047	117.055	115.04			5	Water	10	F1
866	Niacinamide	C00153	HMDB0001406	C6H6N2O	122.048	123.055	121.041	6.28	6.44	5	Water	10	F2
867	Maltol	C11918	HMDB0030776	C6H6O3	126.032	127.039	125.024			5	Water	10	F3
868	Methylcysteine	CSID22826	HMDB0002108	C4H9NO2S	135.035	136.043	134.028	10.99	10.62	5	Water	10	F4
869	Methyl Nicotinate	CSID21111785	HMDB0029806	C7H7NO2	137.048	138.055	136.04	11.67	10.67	5	Water	10	F5
870	Mesifurane	CSID55261	HMDB0034230	C7H10O3	142.063	143.07	141.056			5	Water	10	F6
871	Levoglucosan	CSID9587432	HMDB0000640	C6H10O5	162.053	163.06	161.046	9.33	9.57	5	Water	10	F7
872	N2-Acetylornithine	C00437	HMDB0003357	C7H14N2O3	174.1	175.108	173.093	13.15	12.535	5	Water	10	F8
873	Scyllo-Inositol	C06153	HMDB0006088	C6H12O6	180.063	181.071	179.056	13.8	13.91	5	Water	10	F9
874	Lenticin	C09213	HMDB0061115	C14H18N2O2	246.137	247.144	245.13	9.41	8.205	5	Water	10	F10
875	Maltotriose	C01835	HMDB0001262	C18H32O16	504.169	505.176	503.162	13.54		5	Water	10	F11
876	Malonyl-CoA	C00083	HMDB0001175	C24H38N7O19P3S	853.116	854.123	852.108	12.82		5	Water	10	F12
877	Senecioate	CSID10468	HMDB0000509	C5H8O2	100.052	101.06	99.0451			5	Water	10	G1
878	O-Cresol	C01542	HMDB0002055	C7H8O	108.058	109.065	107.05			5	Water	10	G2
879	S-(2-Aminoethyl)-L-Cysteine	CSID18889	HMDB0033518	C5H12N2O2S	164.062	165.069	163.055	15.27	14.995	5	Water	10	G3
880	Tropate	C01456	HMDB0062590	C9H10O3	166.063	167.07	165.056	5.03	6.13	5	Water	10	G4
881	p-Hydroxymandelate	C11527	HMDB0000822	C8H8O4	168.042	169.05	167.035	8.88	10.28	5	Water	10	G5
882	S-Carboxymethyl-L-cysteine	C03727	-	C5H9NO4S	179.025	180.033	178.018	11.3	12.16	5	Water	10	G6
883	L-Iditol	C01507	HMDB0011632	C6H14O6	182.079	183.086	181.072	12.15	12.04	5	Water	10	G7
884	Selenomethionine	C05335	HMDB0003966	C5H11NO2Se	196.996	198.003	195.988	10.74	10.49	5	Water	10	G8
885	Pilocarpine	C07474	HMDB0015217	C11H16N2O2	208.121	209.128	207.114	4.49	4.63	5	Water	10	G9
886	Prephenate	C00254	HMDB0012283	C10H10O6	226.048	227.055	225.04	11.8		5	Water	10	G10
887	Ribothymidine	CSID393058	HMDB0000884	C10H14N2O6	258.085	259.092	257.078	8.12	7.85	5	Water	10	G11
888	Salicin	C01451	HMDB0003546	C13H18O7	286.105	287.113	285.098	8.5	7.72	5	Water	10	G12
889	2-Methylbenzoate	C07215	HMDB0002340	C8H8O2	136.052	137.06	135.045	4.86	5.16	5	Water	10	H1
890	Tyrosol	C06044	HMDB0004284	C8H10O2	138.068	139.075	137.061	4.86	5.39	5	Water	10	H2
891	1-Phenyl-1,2-propanedione	C17268	HMDB0035243	C9H8O2	148.052	149.06	147.045	3.89		5	Water	10	H3
892	Citronellal	C09848	HMDB0035842	C10H18O	154.136	155.143	153.128			5	Water	10	H4
893	Vanillate	C06672	HMDB0000484	C8H8O4	168.042	169.05	167.035	7.53	8.44	5	Water	10	H5
894	L-Theanine	C01047	HMDB0034365	C7H14N2O3	174.1	175.108	173.093	11.17	10.56	5	Water	10	H6
895	Cotinine	CSID395	HMDB0001046	C10H12N2O	176.095	177.102	175.088	4.88	4.99	5	Water	10	H7
896	1-Methylurate	C16359	HMDB0003099	C6H6N4O3	182.044	183.051	181.037	8.54	9.57	5	Water	10	H8
897	Adenosine Phosphosulfate	C00224	HMDB0001003	C10H14N5O10PS	427.02	428.027	426.013	11.62		5	Water	10	H9
898	Genistin	C09126	HMDB0033988	C21H20O10	432.106	433.113	431.098			5	Water	10	H10
899	Orientin	C10114	HMDB0030614	C21H20O11	448.101	449.108	447.093			5	Water	10	H11
900	Myricitrin	C10108	HMDB0034360	C21H20O12	464.095	465.103	463.088			5	Water	10	H12
901	2-Phenylethanol	C05853	HMDB0033944	C8H10O	122.073	123.08	121.066			5	Water	11	A1
902	Threonate	C21649	-	C4H8O5	136.037	137.044	135.03	10.21	11.35	5	Water	11	A2
903	Carvone	c01767	HMDB0035824	C10H14O	150.104	151.112	149.097	3.87	4.17	5	Ethanol	11	A3
904	2',4'-Dihydroxyacetophenone	C03663	HMDB0029657	C8H8O3	152.047	153.055	151.04	4.43	4.82	5	Water	11	A4
905	Terpinen-4-ol	C17073	HMDB0035833	C10H18O	154.136	155.143	153.128			5	Water	11	A5
906	2-Hydroxyoctanoate	CSID84994	HMDB0000711	C8H16O3	160.11	161.117	159.103	4.07	4.04	5	Water	11	A6
907	Isoxanthopterin	C03975	HMDB0000704	C6H5N5O2	179.044	180.052	178.037	11.03	12.13	5	Water	11	A7
908	Nootkatone	C17914	HMDB0013687	C15H22O	218.167	219.174	217.16			5	Water	11	A8
909	Gibberellin A3	C01699	HMDB0003559	C19H22O6	346.142	347.149	345.134	4.86	5	5	Water	11	A9
910	Naringin	C09789	HMDB0002927	C27H32O14	580.179	581.187	579.172	5.47		5	Water	11	A10
911	Diosmin	C10039	HMDB0029548	C28H32O15	608.174	609.181	607.167	6.86		5	Water	11	A11
912	Succinyl-CoA	C00091	HMDB0001022	C25H40N7O19P3S	867.131	868.139	866.124	12.24		5	Water	11	A12
913	2-Methylpentanal	CSID28985	HMDB0031578	C6H12O	100.089	101.096	99.0815	22.96		5	Water	11	B1
914	2-Ketohexanoate	C00902	HMDB0001864	C6H10O3	130.063	131.07	129.056	4.33	4.42	5	Water	11	B2
915	2,6-Dihydroxybenzoate	C21298	HMDB0013676	C7H6O	154.027	155.034	153.019			5	Water	11	B3
916	2-Aminooctanoate	CSID62727	HMDB0000991	C8H17NO2	159.126	160.133	158.119	8.22	7.825	5	Water	11	B4
917	7-Methylxanthine	C16353	HMDB0001991	C6H6N4O2	166.049	167.056	165.042	7.1	7.65	5	Water	11	B5
918	Gallate	C01424	HMDB0005807	C7H6O5	170.022	171.029	169.014	4	4.42	5	Water	11	B6
919	Epicatechin	C09727	HMDB0001871	C15H14O6	290.079	291.086	289.072	10.06	11.15	5	Water	11	B7
920	7-Methylguanosine	C20674	HMDB0001107	C11H16N5O5	298.115	299.122	297.108			5	Water	11	B8
921	Mangiferin	C10077	HMDB0034410	C19H18O11	422.085	423.092	421.078			5	Water	11	B9
922	Dephospho-CoA	C00882	HMDB0001373	C21H35N7O13P2S	687.149	688.156	686.142	8.89		5	Water	11	B10
923	Trigonelline	C01004	HMDB0000875	C7H7NO2	137.048	138.055	136.04	11.67	10.71	5	Water	11	B11
924	Methylmalonyl-CoA	C00683	HMDB0001269	C25H40N7O19P3S	867.607	868.614	866.6	12.6		5	Water	11	B12
925	2-Oxohexane	CSID11095	HMDB0005842	C6H12O	100.089	101.096	99.0815	4.9	5.14	5	Water	11	C1
926	Ethyl propionate	CSID7463	HMDB0030058	C5H10O2	102.068	103.075	101.061	4.9		5	Water	11	C2
927	Methylsuccinic acid	CSID9922	HMDB0001844	C5H8O4	132.042	133.05	131.035	10.76	12.305	5	Water	11	C3
928	3-Phenyl-1-propanol	CSID13871718	HMDB0033962	C9H12O	136.089	137.096	135.082			5	Water	11	C4
929	2,4-Dihydroxybenzoate	CSID1446	HMDB0029666	C7H6O4	154.027	155.034	153.019	6.38	9.015	5	Water	11	C5
930	7-Hydroxyoctanoate	CSID146647	HMDB0000486	C8H16O3	160.11	161.117	159.103	4.9	5.17	5	Water	11	C6
931	3-Hydroxy-4,5-Dimethyl-2(5H)-Furanone	CSID56569	HMDB0031306	C6H8O3	166.049	167.056	165.042			5	Water	11	C7
932	2,4,6-Trihydroxybenzoate	CSID59891	HMDB0029649	C7H6O5	170.022	171.029	169.014	4.8	7.415	5	Water	11	C8
933	1,3,7-Trimethylurate	C16361	HMDB0002123	C8H10N4O3	210.075	211.083	209.068	4.9	5.005	5	Water	11	C9
934	Pseudouridine	C02067	HMDB0000767	C9H12N2O6	244.07	245.077	243.062	10.93	11.075	5	Water	11	C10
935	Monotropein	C09788	HMDB0035608	C16H22O11	390.116	391.124	389.109	11.16	11.71	5	Water	11	C11
936	Maltotetraose	C02052	HMDB0001296	C24H42O21	666.222	667.229	665.215	13.76		5	Water	11	C12
937	n-Butyl acetate	C12304	HMDB0031325	C6H12O2	116.084	117.091	115.076			5	Water	11	D1
938	D-Cysteine	C00793	HMDB0003417	C3H7NO2S	121.02	122.027	120.012	11.55	13.01	5	Water	11	D2
939	p-Anisidine	C19326	HMDB0029300	C7H9NO	123.068	124.076	122.061	4.49		5	Water	11	D3
940	Sesamol	C10832	HMDB0033812	C7H6O3	138.032	139.039	137.024	4.88		5	Water	11	D4
941	Synephrine	C01869	HMDB0062811	C9H13NO2	167.095	168.102	166.087	16.1		5	Water	11	D5
942	N1-Acetylspermidine	C00612	HMDB0001276	C9H21N3O	187.168	188.176	186.161			5	Water	11	D6
943	Pectate	C00470	HMDB0003363	C6H10O7	194.043	195.05	193.035	12.07	13.2	5	Water	11	D7
944	Homoveratrate	CSID6872	HMDB0000434	C10H12O4	196.074	197.081	195.066	4.88	4.89	5	Water	11	D8
945	Cysteine-S-Sulfate	C05824	HMDB0000731	C3H7NO5S2	200.977	201.984	199.969	11.54	14.18	5	Water	11	D9
946	Neopterin	C05926	HMDB0000845	C9H11N5O4	253.081	254.088	252.074	11.57	12.085	5	Water	11	D10
947	AICA-riboside	CSID16560	HMDB0062179	C9H14N4O5	258.096	259.104	257.089	10.58	10.315	5	Water	11	D11
948	Acetoacetyl-CoA	C00332	HMDB0001484	C25H40N7O18P3S	851.136	852.144	850.129	10.93		5	Water	11	D12
949	2-Pentanone	C01949	HMDB0034235	C5H10O	86.0732	87.0805	85.0659			5	Methanol	11	E1
950	3-(Methylthio)-1-propene	CSID21159856	HMDB0031653	C4H8S	88.0347	89.042	87.0274			5	Methanol	11	E2
951	Glycyrrhizin	C02284	HMDB0029843	C42H62O16	822.404	823.411	821.396	4.61		5	Methanol	11	E3
952	2-Phenylbutyrate	CSID6745	HMDB0000329	C10H12O2	164.084	165.091	163.076			5	Methanol	11	E4
953	2,6-Dimethoxybenzoate	CSID14381	HMDB0029273	C9H10O4	182.058	183.065	181.051	4.61		5	Methanol	11	E5
954	5-Methoxytryptamine	C05659	HMDB0004095	C11H14N2O	190.111	191.118	189.103	13.51		5	Methanol	11	E6
955	Alpha-Humulene	C09684	HMDB0036467	C15H24	204.188	205.195	203.181			5	Methanol	11	E7
956	Phytanate	C01607	HMDB0000801	C20H40O2	312.303	313.31	311.296			5	Methanol	11	E8
957	Adipostatin A	C10809	HMDB0031009	C21H36O2	320.272	321.279	319.264	3.68		5	Methanol	11	E9
958	Aesculin	C09264	HMDB0030820	C15H16O9	340.079	341.087	339.072	8.42		5	Methanol	11	E10
959	Aloin	CSID277139	HMDB0035219	C21H22O9	418.126	419.134	417.119	7.03		5	Methanol	11	E11
960	Quercetin 3-Galactoside	C10073	HMDB0030775	C21H20O12	464.095	465.103	463.088			5	Methanol	11	E12
961	Angelicin	C09060	HMDB0033930	C11H6O3	186.032	187.039	185.024	4.15		5	Methanol	11	F1
962	3-Butyl-1(3H)-isobenzofuranone	C17854	HMDB0032064	C12H14O2	190.099	191.107	189.092			5	Methanol	11	F2
963	Farrerol	C06081	HMDB0004305	C15H26O	222.198	223.206	221.191			5	Methanol	11	F3
964	Coumesterol	C10205	HMDB0002326	C15H8O5	268.037	269.044	267.03	6.59		5	Methanol	11	F4
965	Enterodiol	C18166	HMDB0005056	C18H22O4	302.152	303.159	301.145			5	Methanol	11	F5
966	Isorhamnetin	C10084	HMDB0002655	C16H12O7	316.058	317.066	315.051			5	Methanol	11	F6
967	Berberine	C00757	HMDB0003409	C20H18NO4	336.124	337.131	335.116			5	Methanol	11	F7
968	Cosmosiin	C04608	HMDB0037340	C21H20O10	432.106	433.113	431.098	7.05		5	Methanol	11	F8
969	Chicorate	C10437	HMDB0002375	C22H18O12	474.08	475.087	473.073			5	Methanol	11	F9
970	Amentoflavone	C10018	HMDB0030832	C30H18O10	538.09	539.097	537.083	3.8		5	Methanol	11	F10
971	Canthaxanthin	C08583	HMDB0003154	C40H52O2	564.397	565.404	563.389			5	Methanol	11	F11
972	Asiaticoside	C15428	HMDB0036656	C48H78O19	958.514	959.521	957.506	8.44		5	Methanol	11	F12
973	Phenylglyoxylate	C02137	HMDB0001587	C8H6O3	150.032	151.039	149.024			5	Methanol	11	G1
974	Methyl 3-Indolyacetate	CSID67279	HMDB0029738	C11H11NO2	189.079	190.086	188.072	4.14		5	Methanol	11	G2
975	Phenylacetylglycine	C05598	HMDB0000821	C10H11NO3	193.074	194.081	192.067	4.57		5	Methanol	11	G3
976	Syringate	C10833	HMDB0002085	C9H10O5	198.053	199.06	197.046			5	Methanol	11	G4
977	Phenylpropionylglycine	CSID134261	HMDB0000860	C11H13NO3	207.09	208.097	206.082			5	Methanol	11	G5
978	Sinapate	C00482	HMDB0032616	C11H12O5	224.068	225.076	223.061	4.59		5	Methanol	11	G6
979	Phloretin	C00774	HMDB0003306	C15H14O5	274.084	275.091	273.077	7.2		5	Methanol	11	G7
980	Morin	C10105	HMDB0030796	C15H10O7	302.043	303.05	301.035	7.05		5	Methanol	11	G8
981	Sanguinarine	C06162	HMDB0029367	C20H14NO4	332.092	333.1	331.085			5	Methanol	11	G9
982	Tangeretin	C10190	HMDB0030539	C20H20O7	372.121	373.128	371.114	3.91		5	Methanol	11	G10
983	Phloridzin	C01604	HMDB0036634	C21H24O10	436.137	437.144	435.13	7.23		5	Methanol	11	G11
984	Calycosin 7-Galactoside	NA	HMDB0038821	C22H22O10	446.121	447.129	445.114	7.27		5	Methanol	11	G12
985	Formononetin	C00858	HMDB0005808	C16H12O4	268.074	269.081	267.066	4.2		5	Methanol	11	H1
986	Catechin	C06562	HMDB0002780	C15H14O6	290.079	291.086	289.072			5	Methanol	11	H2
987	Solasodine	C10822	HMDB0035282	C27H43NO2	413.329	414.337	412.322			5	Methanol	11	H3
988	Trifolirhizin	C10538	HMDB0036630	C22H22O10	446.121	447.129	445.114	7.19		5	Methanol	11	H4
989	Nomilin	C08773	HMDB0035772	C28H34O9	514.22	515.228	513.213	3.88		5	Methanol	11	H5
990	Cucurbitacin B	C08794	HMDB0034927	C32H46O8	558.319	559.327	557.312	3.9		5	Methanol	11	H6

## Sheet: Table S2
Table S2 MS/MS standard spectral database (mzVault) curated using Z-HILIC LC-MS
Authentic standard	KEGG ID/CS ID	HMDB ID	Molecular Formula	Monoisotopic mass (Da)	[M+H]+	[M-H]-	RT (min) Z-HILIC 24 min	Ion/Adduct	Polarity	Best CE	MS/MS fragment 1	MS/MS fragment 2	MS/MS fragment 3	MS/MS fragment 4	MS/MS fragment 5
(2-Aminoethyl)Phosphonate	C03557	HMDB0011747	C2H8NO3P	125.024	126.031	124.017	13.13	M+H	ESI+	30	109.004	97.0045	98.9837	126.031	97.9998
1,2,3-Propanetricarboxylate	C19806	HMDB0031193	C6H8O6	176.032	177.039	175.025	12.93	M-H	ESI-	20	157.014	87.0447	69.0341	113.024	131.035
1,3,5-Trimethoxybenzene	D01792	HMDB0059963	C9H12O3	168.079	169.086	167.071	4.31726	M-H	ESI-	30	167.071	139.076	152.048	107.05	148.973
1,3,7-Trimethylurate	C16361	HMDB0002123	C8H10N4O3	210.075	211.083	209.068	4.9	M-H	ESI-	30	209.068	194.044	124.051	137.023	152.046
1,5-Anhydrosorbitol	C07326	HMDB0002712	C6H12O5	164.068	165.076	163.061	11.08	M-H	ESI-	30	101.024	59.0134	71.0133	113.024	83.0133
10-Hydroxydecanoate	C02774	HMDB0244272	C10H20O3	188.141	189.149	187.134	4.64	M-H	ESI-	50	141.128	187.133	139.112	55.0185	185.117
1-Acetoxychavicol acetate	CSID354584	HMDB0041005	C13H14O4	234.089	235.097	233.082	3.73758	M+H	ESI+	20	189.091	161.096	235.097	235.061	217.086
1-Aminocyclopropanecarboxylate	C01234	HMDB0036458	C4H7NO2	101.048	102.055	100.04	11.73	M-H	ESI-	30	100.04	58.0294	99.9255	100.003	86.0371
1-Methoxy-4-(2-Propenyl)Benzene	C10452	HMDB0034121	C10H12O	148.089	149.096	147.082	3.85	M+H	ESI+	30	149.023	121.028	121.064	91.0539	65.0384
1-Methyladenosine	C02494	HMDB0003331	C11H15N5O4	281.112	282.12	280.105	12.51	M+H	ESI+	20	150.077	282.119	252.949	178.192	264.038
1-Methyl-Hydantoin	C02565	HMDB0003646	C4H6N2O2	114.043	115.05	113.036	5.54	M-H	ESI-	50	68.9952	76.9694	113.035	94.9802	95.076
1-Methyl-L-Histidine	C01152	HMDB0000001	C7H11N3O2	169.085	170.092	168.078	12.41	M+H	ESI+	30	96.068	109.076	170.093	97.0758	126.102
1-Methylnicotinamide	C02918	HMDB0000699	C7H9N2O	137.071	138.079	136.064	20.1	M+H	ESI+	50	95.0681	111.063	138.074	97.0473	94.0648
1-Methylurate	C16359	HMDB0003099	C6H6N4O3	182.044	183.051	181.037	8.54	M-H	ESI-	50	96.0197	69.0089	138.03	83.0245	181.036
1-Phenyl-1,2-propanedione	C17268	HMDB0035243	C9H8O2	148.052	149.06	147.045	3.89	M-H	ESI-	20	119.05	147.031	147.067	147.045	54.253
2',3'-cAMP	C02353	HMDB0011616	C10H12N5O6P	329.053	330.06	328.045	8.02	M-H	ESI-	20	134.046	328.045	135.05	192.991	329.048
2',3'-cCMP	C02354	HMDB0011691	C9H12N3O7P	305.041	306.049	304.034	10.5	M+H	ESI+	20	112.05	306.049	178.061	213.016	98.9836
2,3-Diaminopropionate	C03401	HMDB0002006	C3H8N2O2	104.059	105.066	103.051	13.74	M+H	ESI+	20	88.0388	59.06	105.065	76.0389	70.0283
2,3-Dihydroxybenzoate	C00196	HMDB0000397	C7H6O4	154.027	155.034	153.019	6.17	M+H	ESI+	50	119.035	92.0241	155.012	58.065	67.0288
2,3-dihydroxybutanedioate	C00898	HMDB0059916	C4H6O6	150.016	151.024	149.009	12.08	M-H	ESI-	20	87.0083	149.009	72.9926	59.0134	103.003
2,4,6-Trihydroxybenzoate	CSID59891	HMDB0029649	C7H6O5	170.022	171.029	169.014	4.8	M-H	ESI-	30	151.003	125.024	83.0133	169.014	107.013
2',4'-Dihydroxyacetophenone	C03663	HMDB0029659	C8H8O3	152.047	153.055	151.04	4.52597	M-H	ESI-	20	151.039	150.949	112.908	66.4358	145.375
2,4-Dihydroxybenzoate	CSID1446	HMDB0029666	C7H6O4	154.027	155.034	153.019	6.38	M-H	ESI-	30	109.029	65.0393	67.0185	153.019	91.0186
2,4-Dihydroxybutanoate	CSID167259	HMDB0000360	C4H8O4	120.042	121.05	119.035	9.21953	M-H	ESI-	30	119.034	55.0185	76.9695	119.016	71.0133
2,4-Dihydroxypteridine	C03212	HMDB0254198	C6H4N4O2	164.033	165.041	163.026	7.21	M+H	ESI+	30	165.021	69.0331	83.06	124.086	96.9948
2,6-Dihydroxypyridine	C03056	-	C5H5NO2	111.032	112.039	110.025	8.61	M+H	ESI+	50	66.0335	56.0492	94.0283	112.039	84.0441
2-Acetamido-2-Deoxy-Beta-D-Glucosylamine	C01239	HMDB0001104	C8H16N2O5	220.106	221.113	219.099	11.72	M-H	ESI-	50	176.929	76.9697	154.947	218.976	116.694
2-Aminoisobutyrate	C03665	HMDB0001906	C4H9NO2	103.063	104.071	102.056	12.45	M+H	ESI+	20	58.0648	104.07	56.0491	86.0595	57.0332
2-Aminooctanoate	CSID62727	HMDB0000991	C8H17NO2	159.126	160.133	158.119	8.22	M+H	ESI+	20	114.127	160.133	55.0539	97.1006	69.0695
2-Aminophenol	C01987	-	C6H7NO	109.053	110.06	108.045	5.05	M+H	ESI+	30	92.049	110.06	65.0383	111.044	93.0331
2-Deoxy-D-Glucose	CSID97292	HMDB0062477	C6H12O5	164.068	165.076	163.061	12.28	M+H	ESI+	30	165.021	69.0331	83.06	96.9948	124.087
2-Hydroxy-3-methylvalerate	CSID8972081	HMDB0000317	C6H12O3	132.079	133.086	131.071	4.91	M-H	ESI-	20	85.0653	131.071	85.0715	85.0743	129.055
2-Hydroxy-4-(Methylthio)Butanoate	CSID10946	HMDB0037115	C5H10O3S	150.035	151.042	149.028	4.83198	M-H	ESI-	20	149.027	101.024	57.0341	148.952	52.7194
2-Hydroxyadipate	C02360	HMDB0000321	C6H10O5	162.053	163.06	161.046	11.21	M-H	ESI-	20	161.045	143.035	117.055	71.0498	99.0446
2-Hydroxybutyrate	C05984	HMDB0000008	C4H8O3	104.047	105.055	103.04	6.4	M-H	ESI-	30	57.0341	103.039	59.0134	85.0289	101.024
2-Hydroxyglutarate	C03196	HMDB0000694	C5H8O5	148.037	149.044	147.03	11.46	M-H	ESI-	30	57.0342	85.029	101.024	129.019	103.04
2-Hydroxyisocaproate	C03264	HMDB0000624	C6H12O3	132.079	133.086	131.071	4.9103	M-H	ESI-	30	85.0654	69.0341	131.071	131.036	89.0139
2-Hydroxyisovalerate	CSID90190	HMDB0000407	C5H10O3	118.063	119.07	117.056	5.01	M-H	ESI-	30	71.0498	117.055	60.9747	73.0291	76.9697
2-Hydroxyoctanoate	CSID84994	HMDB0000711	C8H16O3	160.11	161.117	159.103	4.07	M-H	ESI-	20	159.102	113.097	159.067	132.056	159.009
2-Hydroxyphenethylamine	C02735	HMDB0001065	C8H11NO	137.084	138.091	136.077	11.19	M-H	ESI-	20	109.04	58.0294	136.05	94.9801	50.0518
2-Hydroxyphenylacetate	C05852	HMDB0062635	C8H8O3	152.047	153.055	151.04	4.89	M-H	ESI-	30	107.05	151.04	150.937	121.029	105.034
2-Hydroxypyridine	C02502	HMDB0013751	C5H5NO	95.0371	96.0444	94.0298	6.68	M+H	ESI+	50	96.044	78.0335	51.0227	50.0149	52.018
2-Isopropylmalate	C02504	HMDB0000402	C7H12O5	176.068	177.076	175.061	9.76	M-H	ESI-	20	115.04	175.061	113.06	85.0655	157.05
2-Keto-3-deoxy-6-phosphogluconate	C04442	HMDB0001376	C6H11O9P	258.014	259.021	257.007	12.53	M-H	ESI-	20	96.969	97.0288	256.96	141.019	69.034
2-Keto-D-gluconate	C03342	HMDB0011732	C6H10O7	194.043	195.05	193.035	11.08	M-H	ESI-	20	103.003	59.0134	193.035	71.0133	89.0238
2-Ketohexanoate	C00902	HMDB0001864	C6H10O3	130.063	131.07	129.056	4.33	M-H	ESI-	30	129.055	58.0295	101.06	57.0342	83.0496
2-Methoxyestrone	C05299	HMDB0000010	C19H24O3	300.173	301.18	299.165	4	M+H	ESI+	20	301.18	283.169	187.075	163.075	137.059
2-Methyl-3-hydroxybutyrate	CSID141015	HMDB0000354	C5H10O3	118.063	119.07	117.056	4.76	M-H	ESI-	50	55.0186	60.9747	73.0291	99.9256	76.9699
2-Methylbenzoate	C07215	HMDB0002340	C8H8O2	136.052	137.06	135.045	4.86	M-H	ESI-	20	135.044	107.049	134.972	94.9799	90.9707
2-Methylbutyrylglycine	CSID168243	HMDB0000339	C7H13NO3	159.09	160.097	158.082	5.05	M-H	ESI-	20	74.0243	158.082	114.092	74.0294	74.0314
2-Methylcitrate	C02225	HMDB0000379	C7H10O7	206.043	207.05	205.035	12.52	M-H	ESI-	20	125.024	87.0083	99.0447	71.0498	101.024
2-Methylglutarate	CSID2497362	HMDB0000422	C6H10O4	146.058	147.065	145.051	10.66	M+H	ESI+	20	69.0331	123.964	146.98	101.059	64.927
2-Methylmalonate	C02170	HMDB0000202	C4H6O4	118.027	119.034	117.019	10.9242	M-H	ESI-	20	73.0289	117.019	55.0184	55.6553	59.013
2-Octanone	CSID7802	HMDB0031294	C8H16O	128.12	129.127	127.113	6.21452	M+H	ESI+	20	87.0548	129.065	70.0284	87.0611	87.0641
2-Octenedioate	CSID4800646	HMDB0000341	C8H12O4	172.074	173.081	171.066	10.6	M-H	ESI-	50	109.065	107.05	59.0135	71.0135	127.076
2-Oxoadipate	C00322	HMDB0000225	C6H8O5	160.037	161.044	159.03	10.84	M-H	ESI-	20	59.0134	115.039	87.0446	159.029	59.017
2-Oxoglutarate	C00026	HMDB0000208	C5H6O5	146.022	147.029	145.014	11.3703	M-H	ESI-	30	57.0342	101.024	73.0291	83.0134	55.0186
2-Oxohexane	CSID11095	HMDB0005842	C6H12O	100.089	101.096	99.0815	4.9	M-H	ESI-	30	99.0193	60.9927	55.0186	75.9613	50.0258
2-Phosphoglycerate	C00631	HMDB0000362	C3H7O7P	185.993	187	184.986	12.55	M-H	ESI-	20	78.9586	96.9691	184.986	166.975	185.155
2-Picolinate	C10164	HMDB0002243	C6H5NO2	123.032	124.039	122.025	9.19	M+H	ESI+	50	83.06	124.086	66.0335	107.06	96.044
2-Piperidinone	CSID12144	HMDB0011749	C5H9NO	99.0684	100.076	98.0611	5.78	M+H	ESI+	30	100.075	56.0492	55.054	82.0648	83.0853
2-Quinolinecarboxylate	C06325	HMDB0000842	C10H7NO2	173.048	174.055	172.04	5.23	M-H	ESI-	20	154.947	172.062	89.0627	74.1256
3-(2-Hydroxyphenyl)Propanoate	C01198	HMDB0033752	C9H10O3	166.063	167.07	165.056	4.92429	M-H	ESI-	20	149.009	165.041	164.968	82.0406	121.566
3-(3,4-Dihydroxyphenyl)Lactate	C01207	HMDB0003503	C9H10O5	198.053	199.06	197.046	9.75356	M-H	ESI-	20	72.9926	179.034	135.044	123.044	197.045
3-(3-Hydroxyphenyl)-3-hydroxypropanoate	CSID93013	HMDB0002643	C9H10O4	182.058	183.065	181.051	7.45	M-H	ESI-	50	121.029	119.05	93.0342	59.0136	91.0549
3-(3-Methoxy-4hydroxyphenyl)lactate	CSID141152	HMDB0000913	C10H12O5	212.068	213.076	211.061	6.23	M-H	ESI-	20	193.05	211.061	165.055	134.037	72.9927
3-(4-hydroxyphenyl)propanoate	C01744	HMDB0002199	C9H10O3	166.063	167.07	165.056	6.93	M-H	ESI-	30	59.0135	93.0341	165.055	121.066	119.05
3-(4-Hydroxyphenyl)Pyruvate	C01179	HMDB0000707	C9H8O4	180.042	181.05	179.035	6.18	M-H	ESI-	30	107.05	178.983	106.042	121.029	93.034
3-(Dimethylaminomethyl)Indole	C08304	HMDB0035762	C11H14N2	174.116	175.123	173.108	12.67	M-H	ESI-	20	154.947	172.957	173.108	155.946	50.1908
3,3',4'5-Tetrahydroxystilbene	C05901	HMDB0004215	C14H12O4	244.074	245.081	243.066	6.6	M+H	ESI+	30	135.044	107.049	199.075	245.107	136.051
3,3'-Dithiobis[2-Methylfuran]	CSID526624	HMDB0040201	C10H10O2S2	226.012	227.02	225.005	14.37	M+H	ESI+	20	100.112	227.175	209.164	227.123	178.192
3,4 Dihydroxymandelate	C05580	HMDB0001866	C8H8O5	184.037	185.044	183.03	11.21	M-H	ESI-	20	137.024	183.029	139.039	183.013	165.019
3,4,5-Trimethoxycinnamate	CSID642910	HMDB0002511	C12H14O5	238.084	239.091	237.077	4.4	M-H	ESI-	30	103.055	133.065	105.07	131.05	237.076
3,4-Dihydroxybenzoate	C00230	HMDB0001856	C7H6O4	154.027	155.034	153.019	11.54	M-H	ESI-	20	109.029	153.019	109.048	152.97	153.035
3,4-Dihydroxyhydrocinnamate	C10447	HMDB0000423	C9H10O4	182.058	183.065	181.051	9.47	M-H	ESI-	30	59.0134	137.06	121.029	109.029	135.045
3,4-Dihydroxyphenylacetate	C01161	HMDB0001336	C8H8O4	168.042	169.05	167.035	8.85195	M-H	ESI-	20	167.035	166.984	123.045	121.029	148.973
3,4-Dihydroxyphenylglycol	C05576	HMDB0000318	C8H10O4	170.058	171.065	169.051	10.21	M-H	ESI-	20	151.04	123.045	168.948	122.037	169.05
3',5'-ADP	C00054	HMDB0000061	C10H15N5O10P2	427.029	428.037	426.022	12.76	M-H	ESI-	30	134.047	158.925	328.044	78.9587	426.02
3,5-Dihydroxybenzoate	CSID7146	HMDB0013677	C7H6O4	154.027	155.034	153.019	10.64	M-H	ESI-	20	109.029	153.019	65.0391	67.0184	152.97
3,5-Diiodo-L-Thyronine	CSID110252	HMDB0000582	C15H13I2NO4	524.893	525.901	523.886	6.33	M-H	ESI-	20	523.887	126.904	506.86	72.0085	75.4276
3,5-Diiodo-L-tyrosine	C01060	HMDB0003474	C9H9I2NO3	432.867	433.874	431.86	10.87	M-H	ESI-	30	126.905	370.842	431.859	259.957	357.835
3-Amino-4-Hydroxybenzoate	C12115	HMDB0304941	C7H7NO3	153.043	154.05	152.035	11.11	M+H	ESI+	50	80.0492	108.044	65.0383	53.0384	136.039
3-Amino-5-Hydroxybenzoate	C12107	HMDB0304942	C7H7NO3	153.043	154.05	152.035	11.37	M-H	ESI-	20	108.045	152.034	94.0294	114.356	101.098
3-Aminoisobutanoate	C05145	HMDB0003911	C4H9NO2	103.063	104.071	102.056	12.65	M+H	ESI+	20	104.07	86.0596	57.0332	58.0648	56.0492
3-Dehydroshikimate	C02637	YMDB0000390	C7H8O5	172.037	173.044	171.03	9.52	M-H	ESI-	20	127.04	109.029	171.03	81.034	71.0133
3-Hydroxy-3-methylglutarate	C03761	HMDB0000355	C6H10O5	162.053	163.06	161.046	11.01	M-H	ESI-	20	99.0446	57.0342	101.024	59.0134	161.045
3-Hydroxyadipate	CSID133894	HMDB0000345	C6H10O5	162.053	163.06	161.046	11.31	M-H	ESI-	20	101.024	99.0445	59.0134	161.045	143.034
3-Hydroxyanthranilate	C00632	HMDB0001476	C7H7NO3	153.043	154.05	152.035	9.57	M-H	ESI-	20	108.045	152.035	91.0182	107.037	50.0846
3-Hydroxybenzaldehyde	C03067	-	C7H6O2	122.037	123.044	121.029	4.43	M-H	ESI-	50	93.0339	121.029	65.0391	108.021	92.0261
3-Hydroxybenzoate	C00587	HMDB0002466	C7H6O3	138.032	139.039	137.024	7.87	M-H	ESI-	20	93.0339	137.024	94.9799	109.029	108.021
3-Hydroxybenzyl Alcohol	C03351	HMDB0059712	C7H8O2	124.052	125.06	123.045	5.19	M-H	ESI-	30	93.0339	123.045	95.0496	105.034	121.029
3-Hydroxybutyrate	C01089	HMDB0000011	C4H8O3	104.047	105.055	103.04	8.1	M-H	ESI-	20	59.0134	103.04	59.017	60.9749	75.9619
3-Hydroxydecanedioate	CSID2285525	HMDB0000350	C10H18O5	218.115	219.123	217.108	9.68	M-H	ESI-	20	157.086	155.107	217.108	59.0134	199.097
3-Hydroxyglutarate	CSID158277	HMDB0000428	C5H8O5	148.037	149.044	147.03	11.65	M-H	ESI-	50	59.0135	85.029	87.0082	67.0185	59.017
3-Hydroxyisobutyrate	C01188	HMDB0000336	C4H8O3	104.047	105.055	103.04	8.48	M-H	ESI-	20	73.0288	103.039	59.0133	73.0361	57.0341
3-Hydroxyisovalerate	CSID62571	HMDB0000754	C5H10O3	118.063	119.07	117.056	4.54	M-H	ESI-	30	73.029	116.928	90.0092	60.9747	99.9253
3-Hydroxymandelate	CSID78444	HMDB0000750	C8H8O4	168.042	169.049	167.035	8.21	M-H	ESI-	20	121.029	123.045	167.035	109.029	93.034
3-Hydroxyphenylacetate	C05593	HMDB0000440	C8H8O3	152.047	153.055	151.04	7.68	M-H	ESI-	30	150.937	50.0225	51.8453	51.9289	54.1076
3-Hydroxysuberate	CSID13498677	HMDB0000325	C8H14O5	190.084	191.091	189.077	10.61	M-H	ESI-	50	59.0135	83.0498	111.045	81.0341	129.055
3-Hydroxyvalerate	CSID96952	HMDB0000531	C5H10O3	118.063	119.07	117.056	4.53401	M-H	ESI-	20	59.0134	117.055	73.029	116.934	117.019
3-Indoleacetonitrile	C02938	HMDB0006524	C10H8N2	156.069	157.076	155.061	4.09601	M-H	ESI-	30	155.049	154.947	154.042	127.054	71.0497
3-Indolebutyrate	C11284	HMDB0002096	C12H13NO2	203.095	204.102	202.087	6.58	M-H	ESI-	30	116.05	158.097	202.087	184.076	129.058
3-Methoxy-4-Hydroxymandelate	C05584	HMDB0000291	C9H10O5	198.053	199.06	197.046	7.55	M-H	ESI-	20	137.024	197.045	178.983	136.016	151.04
3-Methoxytyramine	C05587	HMDB0000022	C9H13NO2	167.095	168.102	166.087	14.34	M+H	ESI+	30	168.069	123.011	59.0489	51.9424	54.339
3-Methoxytyrosine	CSID1607	HMDB0001434	C10H13NO4	211.084	212.092	210.077	11.24	M+H	ESI+	20	153.054	166.086	149.059	195.065	212.092
3-Methyl-2-Oxindole	C02366	HMDB0304943	C9H9NO	147.068	148.076	146.061	4.4	M+H	ESI+	50	133.052	105.033	103.054	130.065	120.081
3-Methyl-2-Oxovalerate	C03465	HMDB0000491	C6H10O3	130.063	131.07	129.056	4.48	M-H	ESI-	20	129.055	101.06	85.0653	129.091	85.0289
3-Methyladenine	C00913	HMDB0011600	C6H7N5	149.07	150.077	148.063	9.18	M+H	ESI+	50	150.078	123.067	133.051	96.0555	108.043
3-Methyladipate	CSID5367267	HMDB0000555	C7H12O4	160.074	161.081	159.066	10.71	M-H	ESI-	30	97.0655	115.076	95.0499	81.0342	159.066
3-Methylcrotonylglycine	C20828	HMDB0000459	C7H11NO3	157.074	158.081	156.067	5.03	M+H	ESI+	50	55.0541	83.0488	53.0384	158.096	143.073
3-Methylglutaconate	CID1267861	HMDB0000522	C6H8O4	144.042	145.05	143.035	9.94084	M-H	ESI-	20	99.0445	143.108	72.2106	79.0704
3-Methylglutarate	CSID11549	HMDB0000752	C6H10O4	146.058	147.065	145.051	10.78	M-H	ESI-	20	101.06	145.05	127.039	83.0495	50.7827
3-Methylhistamine	CSID62725	HMDB0001861	C6H11N3	125.095	126.103	124.088	18.77	M+H	ESI+	30	109.076	96.0678	126.102	97.0756	68.0491
3-Methylsulfinylpropyl Isothiocyanate	CSID10023	HMDB0006095	C5H9NOS2	163.013	164.02	162.005	4.51	M-H	ESI-	30	134.032	162.028	92.05	133.028	98.0063
3-Methylxanthine	C16357	HMDB0001886	C6H6N4O2	166.049	167.056	165.042	7.23	M-H	ESI-	50	122.035	94.0404	150.018	79.017	65.998
3-Nitro-L-Tyrosine	CSID58633	HMDB0001904	C9H10N2O5	226.059	227.066	225.052	11.14	M-H	ESI-	20	163.05	181.061	225.051	136.04	164.034
3-Phosphoglycerate	C00597	HMDB0000807	C3H7O7P	185.993	187	184.986	12.87	M-H	ESI-	20	96.9689	78.9584	184.985	185.154	185.116
3-Propylmalate	C04411	YMDB0000368	C7H12O5	176.068	177.076	175.061	10.09	M-H	ESI-	20	72.9926	113.06	175.061	85.0654	157.05
3-Sulfinoalanine	C00606	HMDB0000996	C3H7NO4S	153.01	154.017	152.002	11.38	M-H	ESI-	20	88.0399	152.002	86.0243	71.0134	64.9698
4,5-Dihydroorotate	C00337	HMDB0003349	C5H6N2O4	158.033	159.04	157.026	9.21	M-H	ESI-	20	113.035	70.0293	114.019	157.025	71.0245
4,5-Di-O-Caffeoylquinate	CSID4976335	HMDB0030707	C25H24O12	516.127	517.134	515.119	4.61	M-H	ESI-	20	353.088	515.12	173.045	179.035	203.035
4,6-Dihydroxyquinoline	C05639	HMDB0004077	C9H7NO2	161.048	162.055	160.04	8.23	M-H	ESI-	50	159.032	118.029	131.037	132.045	160.04
4-Acetamidobutanoate	C02946	HMDB0003681	C6H11NO3	145.074	146.081	144.067	8.71	M-H	ESI-	20	102.055	100.076	144.066	58.0293	126.055
4-Aminobenzoate	C00568	HMDB0001392	C7H7NO2	137.048	138.055	136.04	9.34	M-H	ESI-	20	92.0498	136.04	109.04	58.0294	136.051
4-Aminobutyrate	C00334	HMDB0000112	C4H9NO2	103.063	104.071	102.056	13.57	M+H	ESI+	30	87.0437	69.0332	86.0597	68.0493	58.0649
4-Guanidinobutanoate	C01035	HMDB0003464	C5H11N3O2	145.085	146.092	144.078	13.5	M+H	ESI+	30	87.0437	86.0598	60.0554	146.092	111.055
4-Hydroxy-3-Methoxyphenylglycol	C05594	HMDB0001490	C9H12O4	184.074	185.081	183.066	6.07473	M-H	ESI-	20	150.031	183.066	183.012	165.055	156.056
4-Hydroxy-3-Methylbenzoate	C21167	HMDB0004815	C8H8O3	152.047	153.055	151.04	7.35	M-H	ESI-	20	107.05	151.04	151.022	150.937	107.059
4-Hydroxybenzaldehyde	C00633	HMDB0011718	C7H6O2	122.037	123.044	121.029	4.74	M-H	ESI-	30	78.9663	121.013	76.9695	121.03	93.0341
4-Hydroxybenzoate	C00156	HMDB0000500	C7H6O3	138.032	139.039	137.024	8.83	M-H	ESI-	20	93.0339	137.024	94.98	80.9648	119.017
4-Hydroxy-L-Phenylglycine	C12323	-	C8H9NO3	167.058	168.066	166.051	12.98	M+H	ESI+	30	123.044	168.069	151.039	95.0488	123.011
4-Hydroxyphenylacetate	C00642	HMDB0000020	C8H8O3	152.047	153.055	151.04	8.72	M-H	ESI-	50	107.05	93.0339	95.0496	123.044	150.938
4-Hydroxyphenyllactate	C03672	HMDB0000755	C9H10O4	182.058	183.065	181.051	7.04	M-H	ESI-	20	163.039	135.045	181.05	119.05	72.9926
4-Imidazoleacetate	C02835	HMDB0002024	C5H6N2O2	126.043	127.05	125.036	10.71	M+H	ESI+	20	81.0443	127.05	99.0548	81.05	83.0598
4-Methoxyphenylacetate	CSID 7406	HMDB0002072	C9H10O3	166.063	167.07	165.056	4.79825	M-H	ESI-	20	106.042	108.021	138.032	121.065	165.055
4-Methylcatechol	C06730	HMDB0000873	C7H8O2	124.052	125.06	123.045	7.04	M-H	ESI-	30	81.0453	123.056	93.0339	121.029	58.0294
4-Pyridoxate	C00847	HMDB0000017	C8H9NO4	183.053	184.06	182.046	4.43	M+H	ESI+	30	166.05	148.039	138.055	184.061	110.06
4-Pyridoxolactone	C00971	HMDB0003454	C8H7NO3	165.043	166.05	164.035	6.52	M+H	ESI+	30	166.05	148.039	138.055	122.06	124.087
4-Quinolinecarboxylate	C06414	HMDB0257047	C10H7NO2	173.048	174.055	172.04	5	M-H	ESI-	20	128.05	172.04	144.045	154.947	146.061
5,7-Dihydroxyflavone	C10028	HMDB0036619	C15H10O4	254.058	255.065	253.051	4.12	M-H	ESI-	50	63.0235	253.05	143.05	65.0028	107.013
5-Aminolevulinate	C00430	HMDB0001149	C5H9NO3	131.058	132.066	130.051	11.73	M+H	ESI+	20	86.0596	114.054	55.0175	132.065	68.0491
5-Aminopentanoate	C00431	HMDB0003355	C5H11NO2	117.079	118.086	116.072	13.62	M+H	ESI+	30	118.086	59.0727	58.0649	73.0282	72.0805
5'-Deoxyadenosine	C05198	HMDB0001983	C10H13N5O3	251.102	252.109	250.095	6.68	M+H	ESI+	20	136.061	252.11	73.0281	117.054	99.0435
5-Hydroxyindoleacetate	C05635	HMDB0000763	C10H9NO3	191.058	192.066	190.051	10.94	M-H	ESI-	20	146.061	190.051	160.04	144.045	132.045
5-Hydroxylysine	C16741	HMDB0000450	C6H14N2O3	162.1	163.108	161.093	17.7	M+H	ESI+	20	128.07	82.0646	100.075	145.096	146.081
5-Hydroxypipecolate	CSID133730	HMDB0029426	C6H11NO3	145.074	146.081	144.067	12.77	M+H	ESI+	20	82.0648	146.081	128.07	100.075	55.054
5-Hydroxytryptophan	C00643	HMDB0000472	C11H12N2O3	220.085	221.092	219.077	12.96	M-H	ESI-	30	144.045	132.045	74.0241	158.061	219.077
5-Methoxyindoleacetate	C05660	HMDB0004096	C11H11NO3	205.074	206.081	204.067	7	M-H	ESI-	20	145.053	204.066	160.076	144.045	53.8273
5-Methoxytryptamine	C05659	HMDB0004095	C11H14N2O	190.111	191.118	189.103	13.51	M-H	ESI-	20	188.965	178.191	144.961	178.167	51.577
5-Methylcytidine	CSID83877	HMDB0000982	C10H15N3O5	257.101	258.108	256.094	10.33	M-H	ESI-	50	124.051	81.0452	238.95	95.0609	214.913
5-Methylcytosine	C02376	HMDB0002894	C5H7N3O	125.059	126.066	124.052	9.65	M+H	ESI+	50	109.039	81.0444	56.0493	54.0336	83.0601
5-Oxoproline	C01879	HMDB0000267	C5H7NO3	129.043	130.05	128.035	9.19	M-H	ESI-	30	128.035	82.0294	84.0451	52.019	50.1656
5-Valerolactone	C02240	HMDB0250981	C5H8O2	100.052	101.06	99.0451	4.21	M+H	ESI+	20	59.0601	55.0539	101.059	59.0488	101.071
6beta-Hydroxyasiatate	CSID227128	HMDB0036670	C30H48O6	504.345	505.352	503.338	4.50249	M-H	ESI-	50	503.338	504.342	437.306	485.328	69.4282
6-Carboxyhexanoate	C02656	HMDB0000857	C7H12O4	160.074	161.081	159.066	10.62	M-H	ESI-	20	97.0654	159.066	115.076	95.0497	83.0497
6-Hydroxynicotinate	C01020	HMDB0002658	C6H5NO3	139.027	140.034	138.02	9.68	M+H	ESI+	50	140.034	78.0335	112.039	51.0227	95.0121
6-Phosphogluconate	C00345	HMDB0001316	C6H13O10P	276.025	277.032	275.017	12.69	M+H	ESI+	20	98.9837	115.039	161.044	235.188	97.0279
7-Hydroxyoctanoate	CSID146647	HMDB0000486	C8H16O3	160.11	161.117	159.103	4.9	M-H	ESI-	30	159.102	99.081	113.097	157.087	141.092
7-Isopropyl-1,4-Dimethylazulene	C09675	HMDB0036648	C15H18	198.141	199.148	197.134	4.51	M+H	ESI+	20	74.0961	174.972	199.18	100.075	175.972
7-Methylxanthine	C16353	HMDB0001991	C6H6N4O2	166.049	167.056	165.042	7.1	M-H	ESI-	50	122.035	108.02	150.018	107.012	67.0296
Abscisate	C06082	HMDB0035140	C15H20O4	264.136	265.143	263.129	4.27	M+H	ESI+	20	247.133	229.122	201.127	187.112	163.075
Acetoacetate	C00164	HMDB0000060	C4H6O3	102.032	103.039	101.024	5.01	M-H	ESI-	20	57.0342	75.9616	59.9668	101.024	101.006
Acetoacetyl-CoA	C00332	HMDB0001484	C25H40N7O18P3S	851.136	852.144	850.129	10.93	M-H	ESI-	30	766.108	408.011	426.022	419.044	686.142
Acetoin	C00466	HMDB0003243	C4H8O2	88.0524	89.0597	87.0451	11.3641	M-H	ESI-	20	87.0444	87.0081	89.6127	60.2924	51.0822
Acetophenone	C07113	HMDB0033910	C8H8O	120.058	121.065	119.05	6.76	M+H	ESI+	30	91.0538	95.0487	93.0695	53.0384	65.0383
Acetylsalicylic acid	C01405	HMDB0001879	C9H8O4	180.042	181.05	179.035	3.59	M+H	ESI+	20	109.064	79.0539	81.0695	153.054	107.085
Aconitate	C00417	HMDB0000072	C6H6O6	174.016	175.024	173.009	12.66	M-H	ESI-	20	154.947	85.029	172.957	129.019	111.008
Acteoside	C10501	HMDB0034843	C29H36O15	624.205	625.213	623.198	10.03	M-H	ESI-	30	161.025	623.2	461.168	624.203	162.028
Adenine	C00147	HMDB0000034	C5H5N5	135.054	136.062	134.047	9.06	M-H	ESI-	50	107.036	92.0248	134.047	65.014	68.0249
Adenosine	C00212	HMDB0000050	C10H13N5O4	267.097	268.104	266.089	8.79999	M+H	ESI+	20	225.988	250.028	69.0333	116.07	268.103
Adenosine Phosphosulfate	C00224	HMDB0001003	C10H14N5O10PS	427.02	428.027	426.013	11.62	M-H	ESI-	20	346.055	426.012	178.195	67.0424	68.3143
Adipate	C06104	HMDB0000448	C6H10O4	146.058	147.065	145.051	11.19	M-H	ESI-	20	83.0497	101.06	145.05	81.0341	83.0558
Adipostatin A	C10809	HMDB0031009	C21H36O2	320.272	321.279	319.264	3.68	M-H	ESI-	30	319.238	318.927	178.168	178.19	318.886
ADP	C00008	HMDB0001341	C10H15N5O10P2	427.029	428.037	426.022	11.97	M-H	ESI-	30	134.047	158.925	78.9589	426.021	328.045
ADP-Glucose	C00498	HMDB0006557	C16H25N5O15P2	589.082	590.09	588.075	11.09	M-H	ESI-	20	588.074	346.055	241.012	408.011	589.077
ADP-Ribose	C00301	HMDB0001178	C15H23N5O14P2	559.072	560.079	558.064	11.1	M+H	ESI+	20	348.071	136.061	428.037	524.058	560.079
Aesculin	C09264	HMDB0030820	C15H16O9	340.079	341.087	339.072	8.42	M-H	ESI-	50	183.012	339.198	314.872	276.878	178.167
Agmatine Sulfate	CSID2073875	-	C5H16N4O4S	228.089	229.097	227.082	3.99	M+H	ESI+	20	83.085	111.043	55.0539	129.054	101.059
Agnuside	C09765	HMDB0036561	C22H26O11	466.148	467.155	465.14	6.86	M-H	ESI-	30	285.077	465.14	137.024	165.056	303.087
AICAR	C04677	HMDB0001517	C9H15N4O8P	338.063	339.07	337.055	11.67	M-H	ESI-	30	78.9586	96.9691	337.055	125.046	150.98
AICA-riboside	CSID16560	HMDB0062179	C9H14N4O5	258.096	259.104	257.089	10.5745	M-H	ESI-	20	125.046	257.088	256.96	58.6125	61.4585
Allantoin	C01551	HMDB0000462	C4H6N4O3	158.044	159.051	157.037	12.09	M-H	ESI-	50	156.944	97.0038	59.0247	71.0246	114.03
Alliin	C08265	HMDB0033592	C6H11NO3S	177.046	178.053	176.039	9.43	M+H	ESI+	20	88.0388	137.014	120.011	161.026	74.0233
Allose	C01487	HMDB0001151	C6H12O6	180.063	181.071	179.056	12.1	M-H	ESI-	20	59.0134	71.0133	89.0237	178.983	101.024
Aloin	CSID277139	HMDB0035219	C21H22O9	418.126	419.134	417.119	7.03	M-H	ESI-	50	119.016	113.06	416.884	178.191	398.875
Alpha-aminobutyrate	C02356	HMDB0000452	C4H9NO2	103.063	104.071	102.056	12.42	M+H	ESI+	20	58.0648	104.07	58.07	86.0597	51.6997
Alpha-ketoisovalerate	C00141	HMDB0000019	C5H8O3	116.047	117.055	115.04	4.94	M-H	ESI-	30	115.04	87.0448	71.0499	114.936	52.3872
Alpha-Mangostin	C10080	HMDB0035796	C24H26O6	410.173	411.18	409.166	3.69	M-H	ESI-	30	409.166	394.142	351.088	339.088	377.14
Alpha-Terpinene	C09898	HMDB0036995	C10H16	136.125	137.133	135.118	3.59	M+H	ESI+	50	137.107	55.054	81.0569	79.054	96.0805
Amentoflavone	C10018	HMDB0030832	C30H18O10	538.09	539.097	537.083	3.80175	M-H	ESI-	30	537.083	375.051	417.061	443.04	399.051
Aminoadipate	C00956	HMDB0000510	C6H11NO4	161.069	162.076	160.062	11.85	M-H	ESI-	30	116.071	142.05	98.0605	160.061	96.0448
AMP	C00020	HMDB0000045	C10H14N5O7P	347.063	348.07	346.056	10.96	M-H	ESI-	30	78.9585	96.9689	346.055	134.046	211.001
Amygdalin	C08325	HMDB0035030	C20H27NO11	457.158	458.166	456.151	9.04	M+H	ESI+	20	296.112	458.165	145.048	178.197	85.028
Angelicin	C09060	HMDB0033930	C11H6O3	186.032	187.039	185.024	4.15	M+H	ESI+	50	131.048	88.021	55.0539	115.054	83.085
Aniline-2-Sulfonate	C06333	HMDB0304940	C6H7NO3S	173.015	174.022	172.007	6.24	M-H	ESI-	50	79.9569	172.007	108.045	107.037	66.1703
Anserine	C01262	HMDB0000194	C10H16N4O3	240.122	241.13	239.115	13.16	M+H	ESI+	30	109.076	170.092	126.102	241.13	153.066
Apigenin	C01477	HMDB0002124	C15H10O5	270.053	271.06	269.046	5.86	M-H	ESI-	50	117.034	151.003	269.045	107.013	149.024
Arabitol	C00532	HMDB0001851	C5H12O5	152.068	153.076	151.061	11.66	M-H	ESI-	20	151.061	71.0133	101.024	89.0238	59.0134
Arbutin	C06186	HMDB0029943	C12H16O7	272.09	273.097	271.082	9.68	M-H	ESI-	20	108.021	109.029	71.0134	151.04	161.045
Arctigenin	C10545	HMDB0030087	C21H24O6	372.157	373.165	371.15	3.96	M+H	ESI+	20	137.059	305.117	355.154	237.112	337.144
Arecoline	C10129	HMDB0030353	C8H13NO2	155.095	156.102	154.087	5.39	M+H	ESI+	30	156.102	113.06	81.0333	53.0384	124.076
Argininosuccinate	C03406	HMDB0000052	C10H18N4O6	290.123	291.13	289.115	12.85	M+H	ESI+	30	116.071	70.0651	176.067	291.13	159.077
Ascorbate	C00072	HMDB0000044	C6H8O6	176.032	177.039	175.025	11.03	M-H	ESI-	20	115.003	156.944	87.0082	71.0133	175.024
Asiatate	C08617	NA	C30H48O5	488.35	489.357	487.343	4.13928	M-H	ESI-	50	487.343	455.317	467.317	488.346	409.311
Asiaticoside	C15428	HMDB0036656	C48H78O19	958.514	959.521	957.506	8.44	M-H	ESI-	20	469.155	957.504	487.342	161.045	247.082
Asparagine	C00152	HMDB0000168	C4H8N2O3	132.053	133.061	131.046	12.81	M+H	ESI+	20	74.0232	87.0548	133.06	116.034	88.0388
Aspartate	C00049	HMDB0000191	C4H7NO4	133.038	134.045	132.03	11.79	M+H	ESI+	20	74.0233	88.0388	116.034	134.044	50.0383
Aspartylglycosamine	C04540	HMDB0000489	C12H21N3O8	335.133	336.14	334.126	12.9	M-H	ESI-	20	113.035	316.114	196.072	214.083	334.125
ATP	C00002	HMDB0000538	C10H16N5O13P3	506.996	508.003	505.988	12.52	M-H	ESI-	30	158.926	408.011	505.989	176.936	426.022
Atropine	C01479	HMDB0014712	C17H23NO3	289.168	290.175	288.16	11.4	M+H	ESI+	50	124.112	93.0695	91.0539	67.054	290.176
Azelate	C08261	HMDB0000784	C9H16O4	188.105	189.112	187.098	9.64	M-H	ESI-	30	125.097	187.097	97.0653	123.081	57.0341
Baicalin	C10025	HMDB0041832	C21H18O11	446.085	447.092	445.078	4.62	M-H	ESI-	20	269.046	113.024	175.025	445.078	85.0293
Benzoate	C00180	HMDB0001870	C7H6O2	122.037	123.044	121.029	4.89	M-H	ESI-	50	78.9663	76.9694	62.9715	93.034	96.977
Bergapten	C01557	HMDB0030637	C12H8O4	216.042	217.05	215.035	4.03	M+H	ESI+	50	202.026	174.031	118.041	146.036	115.054
Beta-Alanine	C00099	HMDB0000056	C3H7NO2	89.0477	90.055	88.0404	13.37	M-H	ESI-	20	88.0397	59.0134	88.0036	50.354	51.242
Beta-Glycerophosphate	C02979	HMDB0002520	C3H9O6P	172.014	173.021	171.006	11.29	M-H	ESI-	20	78.9585	171.006	96.9691	171.139	171.102
Betaine	C00719	HMDB0000043	C5H11NO2	117.079	118.086	116.072	11.45	M+H	ESI+	30	118.086	59.0727	58.0649	59.0762	58.0684
Beta-NAD	C00003	HMDB0000902	C21H27N7O14P2	663.109	664.116	662.102	11.53	M+H	ESI+	20	428.037	524.059	136.062	542.069	232.083
Beta-Pinene	C09882	HMDB0036560	C10H16	136.125	137.133	135.118	3.51	M+H	ESI+	50	137.107	81.0569	55.054	96.0804	80.0492
Betonicine	C08269	HMDB0029412	C7H13NO3	159.09	160.097	158.082	11.76	M+H	ESI+	50	88.0755	58.065	160.097	102.055	70.0649
Bilirubin	C00486	HMDB0000054	C33H36N4O6	584.263	585.271	583.256	3.92	M-H	ESI-	20	285.125	583.256	253.135	539.266	584.26
Biliverdin	C00500	HMDB0001008	C33H34N4O6	582.248	583.255	581.241	4.17	M-H	ESI-	20	537.25	285.124	239.119	581.239	493.261
Bilobalide	C07605	HMDB0036735	C15H18O8	326.1	327.107	325.093	4.18	M-H	ESI-	20	163.112	237.113	193.123	219.102	325.092
Biochanin A	C00814	HMDB0002338	C16H12O5	284.068	285.076	283.061	3.96	M-H	ESI-	30	283.061	268.037	283.263	284.064	269.04
Biotin (B7)	C00120	HMDB0000030	C10H16N2O3S	244.088	245.095	243.081	8.64	M-H	ESI-	50	95.0246	166.087	156.085	68.0502	139.058
Boldine	C09365	HMDB0039085	C19H21NO4	327.147	328.154	326.14	6.18	M+H	ESI+	20	328.154	297.112	265.086	253.086	282.089
Bovinocidin	C05669	HMDB0034259	C3H5NO4	119.022	120.029	118.015	6.31	M+H	ESI+	30	96.9948	78.9845	120.081	50.8602	56.0683
Caffeate	C01481	HMDB0001964	C9H8O4	180.042	181.05	179.035	10.326	M-H	ESI-	20	135.045	179.035	178.983	90.9706	178.965
Caffeine	C07481	HMDB0001847	C8H10N4O2	194.08	195.088	193.073	4.71	M+H	ESI+	50	138.066	110.071	69.0444	83.0601	123.042
Calycosin 7-Galactoside	NA	HMDB0038821	C22H22O10	446.121	447.129	445.114	7.27	M+H	ESI+	20	285.075	447.127	85.955	88.7912	92.8577
cAMP	C00575	HMDB0000058	C10H12N5O6P	329.053	330.06	328.045	8.79	M-H	ESI-	30	134.047	328.044	78.9585	192.99	96.9689
Camphene	C06076	HMDB0059839	C10H16	136.125	137.133	135.118	3.75	M+H	ESI+	30	137.059	122.036	137.107	94.0409	79.0539
Camphor	C00808	HMDB0059838	C10H16O	152.12	153.127	151.113	3.87	M+H	ESI+	20	79.0539	153.127	135.116	107.085	81.0694
Canavanine	C00308	HMDB0002706	C5H12N4O3	176.091	177.098	175.084	13.74	M+H	ESI+	20	76.0501	160.071	118.049	177.098	72.0439
Capsaicin	C06866	HMDB0002227	C18H27NO3	305.199	306.206	304.192	3.87	M+H	ESI+	20	137.06	182.154	170.154	153.127	306.207
Carnosic Acid	CSID400886	HMDB0002358	C20H28O4	332.199	333.206	331.191	3.53	M+H	ESI+	30	245.153	287.197	163.075	191.106	269.182
Carnosine	C00386	HMDB0000033	C9H14N4O3	226.107	227.114	225.099	13.66	M+H	ESI+	20	156.076	110.071	210.087	227.113	181.108
Carvone	c01767	HMDB0035824	C10H14O	150.104	151.112	149.097	3.87	M+H	ESI+	30	95.0851	67.0539	151.123	105.069	123.08
Cassiastearoptene	CSID556589	HMDB0033830	C10H10O2	162.068	163.075	161.061	3.79	M+H	ESI+	50	91.0538	79.0539	95.0488	115.054	55.0178
Casticin	CSID4474632	HMDB0030660	C19H18O8	374.1	375.107	373.093	3.95	M-H	ESI-	50	372.867	354.856	373.865	178.191	62.1329
Catechin	C14079	HMDB0037953	C15H14O6	290.079	291.086	289.072	9.6	M+H	ESI+	20	249.024	69.0331	273.061	139.039	123.044
CDP	C00112	HMDB0001546	C9H15N3O11P2	403.018	404.025	402.011	12.74	M-H	ESI-	30	78.9587	158.925	402.01	383.999	110.036
Celastrol	CSID63959	HMDB0002385	C29H38O4	450.277	451.284	449.27	3.81051	M-H	ESI-	30	449.272	405.281	390.258	450.275	361.219
Cellobiose	C06422	HMDB0000055	C12H22O11	342.116	343.124	341.109	13.1	M-H	ESI-	20	101.024	161.045	97.029	71.0134	73.029
cGMP	C00942	HMDB0001314	C10H12N5O7P	345.047	346.055	344.04	10.52	M+H	ESI+	20	152.056	346.055	346.205	153.04	153.06
Cinnamoylglycine-trans	CSID618829	HMDB0011621	C11H11NO3	205.074	206.081	204.067	4.96	M-H	ESI-	30	130.066	160.076	52.019	82.0294	117.071
Cinnamyl Alcohol	C02394	HMDB0029697	C9H10O	134.073	135.08	133.066	3.87	M+H	ESI+	30	107.085	91.0538	79.0538	105.069	109.064
Cis-4-Hydroxy-D-Proline	C03440	HMDB0060460	C5H9NO3	131.058	132.066	130.051	13.19	M+H	ESI+	20	86.0596	132.065	68.0491	58.0648	114.054
Citicoline	C00307	HMDB0001413	C14H27N4O11P2	489.115	490.122	488.108	12.18	M+H	ESI+	20	490.118	361.065	379.075	264.04	360.061
Citraconate	C02226	HMDB0000634	C5H6O4	130.027	131.034	129.019	6.42	M-H	ESI-	20	85.029	129.019	85.0352	85.0381	129.045
Citramalate	C00815	HMDB0000426	C5H8O5	148.037	149.044	147.03	11.89	M-H	ESI-	30	87.0081	85.0289	57.0341	147.029	59.0134
Citrate	C00158	HMDB0000094	C6H8O7	192.027	193.034	191.02	13.0763	M-H	ESI-	30	111.008	87.0081	85.0289	57.0341	129.019
CMP	C00055	HMDB0000095	C9H14N3O8P	323.052	324.059	322.045	12	M-H	ESI-	30	78.9585	96.969	322.044	138.98	211.001
Coenzyme A	C00010	HMDB0001423	C21H36N7O16P3S	767.115	768.123	766.108	11.38	M-H	ESI-	30	408.011	419.044	426.022	686.141	766.107
Corilagin	C10219	HMDB0031457	C27H22O18	634.081	635.088	633.073	3.44	M+H	ESI+	20	634.756	635.09	634.422	635.426	476.317
Cortisol	C00735	HMDB0000063	C21H30O5	362.209	363.217	361.202	4.4	M+H	ESI+	20	363.217	327.195	121.065	309.185	345.206
Cortisol-21-Acetate	C02821	-	C23H32O6	404.22	405.227	403.213	4	M+H	ESI+	30	309.185	327.196	241.159	121.064	267.175
Cosmosiin	C04608	HMDB0037340	C21H20O10	432.106	433.113	431.098	7.05	M-H	ESI-	30	431.099	269.046	268.038	311.056	432.101
Costunolide	C09382	HMDB0036688	C15H20O2	232.146	233.154	231.139	3.91	M-H	ESI-	50	231.175	145.066	133.066	106.042	146.074
Cotinine	CSID395	HMDB0001046	C10H12N2O	176.095	177.102	175.088	4.88	M+H	ESI+	30	177.102	80.0492	98.0598	146.06	118.065
Coumarin	C05851	HMDB0001218	C9H6O2	146.037	147.044	145.029	3.97	M+H	ESI+	30	123.964	64.9269	119.049	91.0538	69.0332
Coumesterol	C10205	HMDB0002326	C15H8O5	268.037	269.044	267.03	6.59	M+H	ESI+	50	213.054	197.059	241.049	157.064	141.069
Creatine	C00300	HMDB0000064	C4H9N3O2	131.069	132.077	130.062	13.01	M+H	ESI+	50	90.0546	72.0553	87.0788	58.0523	87.055
Creatinine	C00791	HMDB0000562	C4H7N3O	113.059	114.066	112.052	9.7	M+H	ESI+	50	114.066	72.0441	86.071	57.0445	52.8749
CTP	C00063	HMDB0000082	C9H16N3O14P3	482.985	483.992	481.977	13.27	M-H	ESI-	30	158.926	384	481.977	402.011	176.936
Cucurbitacin B	C08794	HMDB0034927	C32H46O8	558.319	559.327	557.312	3.9	M-H	ESI-	30	411.217	497.29	539.301	301.144	165.092
Curcumin	C10443	HMDB0002269	C21H20O6	368.126	369.133	367.119	3.9	M+H	ESI+	20	177.055	285.112	369.134	245.081	175.075
Cyanocobalamin (B12)	C02823	HMDB0000607	C63H89CoN14O14P	1355.58	1356.58	1354.57	10.66	M+H	ESI+	30	1210.49	1125.45	998.482	913.445	1124.45
Cys-Gly	C01419	HMDB0000078	C5H10N2O3S	178.041	179.049	177.034	10.71	M-H	ESI-	20	143.045	176.928	99.0556	74.0241	58.0293
Cysteate	C00506	HMDB0002757	C3H7NO5S	169.004	170.012	167.997	11.52	M-H	ESI-	30	80.9647	71.0133	150.97	167.997	86.0242
Cysteine-S-Sulfate	C05824	HMDB0000731	C3H7NO5S2	200.977	201.984	199.969	11.54	M-H	ESI-	20	136.007	199.969	80.9646	74.0064	120.012
Cystine	C00491	HMDB0000192	C6H12N2O4S2	240.024	241.031	239.017	12.69	M+H	ESI+	20	151.983	120.011	122.027	241.032	74.0234
Cytidine	C00475	HMDB0000089	C9H13N3O5	243.086	244.093	242.078	11.14	M+H	ESI+	50	112.05	95.0237	69.0444	94.0397	57.0332
Cytosine	C00380	HMDB0000630	C4H5N3O	111.043	112.051	110.036	10.61	M+H	ESI+	50	95.0236	67.0288	68.0128	69.0444	52.018
Daidzein	C10208	HMDB0003312	C15H10O4	254.058	255.065	253.051	6.25	M+H	ESI+	50	199.076	137.023	255.065	181.065	227.07
Daidzin	C10216	HMDB0033991	C21H20O9	416.111	417.118	415.103	6.72	M-H	ESI-	30	253.05	252.042	415.102	295.06	254.053
D-Alanine	C00133	HMDB0001310	C3H7NO2	89.0477	90.055	88.0404	12.91	M-H	ESI-	20	88.0397	51.0305	53.6149	53.9408	54.4741
dAMP	C00360	HMDB0000905	C10H14N5O6P	331.068	332.075	330.061	10.65	M-H	ESI-	30	78.9588	195.006	134.047	176.996	96.9694
dATP	C00131	HMDB0001532	C10H16N5O12P3	491.001	492.008	489.994	12.36	M-H	ESI-	30	158.925	392.017	489.994	410.027	176.936
dCDP	C00705	HMDB0001245	C9H15N3O10P2	387.023	388.031	386.016	12.55	M-H	ESI-	30	78.9585	158.925	386.015	368.004	256.961
dCMP	C00239	HMDB0001202	C9H14N3O7P	307.057	308.064	306.05	11.57	M-H	ESI-	30	78.9585	195.006	96.969	110.035	176.995
D-Cysteine	C00793	HMDB0003417	C3H7NO2S	121.02	122.027	120.012	11.55	M+H	ESI+	20	104.07	122.081	56.0493	57.0332	122.096
Dehydroascorbate	C00425	HMDB0001264	C6H6O6	348.033	349.04	347.026	7.15	M-H	ESI-	20	154.947	172.957	111.008	76.9695	129.019
Delta-Decalactone	CSID12282	HMDB0037116	C10H18O2	170.131	171.138	169.123	3.65	M+H	ESI+	30	72.0441	89.0705	83.0852	171.149	55.054
Deoxyadenosine	C00559	HMDB0000101	C10H13N5O3	251.102	252.109	250.095	7.73	M-H	ESI-	30	134.046	250.144	178.19	134.036	178.171
Deoxycarnitine	C01181	HMDB0001161	C7H15NO2	145.11	146.118	144.103	13.12	M+H	ESI+	30	87.0437	60.0805	146.117	60.0841	60.0858
Deoxycytidine	C00881	HMDB0000014	C9H13N3O4	227.091	228.098	226.083	10.27	M-H	ESI-	20	93.0451	110.035	135.056	226.083	136.051
Deoxyguanosine	C00330	HMDB0000085	C10H13N5O4	267.097	268.104	266.089	10.6	M-H	ESI-	30	150.042	266.089	176.057	133.015	59.0134
Deoxyinosine	C05512	HMDB0000071	C10H12N4O4	252.086	253.093	251.079	9.75	M+H	ESI+	20	137.045	253.092	253.227	178.191	98.9835
Deoxyribose	C01801	HMDB0003224	C5H10O4	134.058	135.065	133.051	9.52	M-H	ESI-	20	133.051	133.041	106.041	85.0292	133.031
Deoxyribose-5-Phosphate	C00673	HMDB0001031	C5H11O7P	214.024	215.032	213.017	11.34	M-H	ESI-	50	78.9585	96.9689	56.6415	65.7108	89.7031
Deoxyuridine	C00526	HMDB0000012	C9H12N2O5	228.075	229.082	227.067	7.68	M+H	ESI+	20	113.034	117.054	229.235	229.05	99.0437
Dephospho-CoA	C00882	HMDB0001373	C21H35N7O13P2S	687.149	688.156	686.142	8.88482	M-H	ESI-	30	686.141	419.044	339.078	408.011	346.055
Dethiobiotin	C01909	HMDB0003581	C10H18N2O3	214.132	215.139	213.124	4.89	M-H	ESI-	30	213.124	170.118	169.134	96.0813	126.092
dGDP	C00361	HMDB0000960	C10H15N5O10P2	427.029	428.037	426.022	12.84	M-H	ESI-	30	158.925	426.021	78.9587	408.01	274.972
D-Glucurono-6,3-Lactone	C02670	HMDB0006355	C6H8O6	176.032	177.039	175.025	9.68	M-H	ESI-	20	113.024	85.0288	156.944	95.0131	174.954
dGMP	C00362	HMDB0001044	C10H14N5O7P	347.063	348.07	346.056	11.99	M-H	ESI-	30	78.9587	150.042	195.006	96.9692	346.056
dGTP	C00286	HMDB0001440	C10H16N5O13P3	506.996	508.003	505.988	13.337	M-H	ESI-	30	158.925	408.01	505.989	506.264	505.263
Diaminopimelate	C00666	HMDB0001370	C7H14N2O4	190.095	191.103	189.088	14.12	M-H	ESI-	30	128.071	189.088	111.045	72.0085	171.077
Diethanolamine	C06772	HMDB0004437	C4H11NO2	105.079	106.086	104.072	15.92	M+H	ESI+	20	88.0751	106.086	70.0647	62.0597	56.5543
Dihydrobiopterin	C02953	HMDB0000038	C9H13N5O3	239.102	240.109	238.095	11.32	M+H	ESI+	30	165.064	168.088	196.083	180.088	179.08
Dihydrocapsaicin	C16952	HMDB0038457	C18H29NO3	307.215	308.222	306.207	3.85	M-H	ESI-	20	170.154	306.207	119.049	187.039	143.05
Dihydrogenistein	C14458	HMDB0005897	C15H12O5	272.068	273.076	271.061	5.23	M+H	ESI+	30	69.0332	273.061	178.214	178.192	56.9562
Dihydrothymine	C00906	HMDB0000079	C5H8N2O2	128.059	129.066	127.051	9.61	M+H	ESI+	20	87.0548	86.0596	84.0439	69.0331	129.065
Dihydrouracil	C00429	HMDB0000076	C4H6N2O2	114.043	115.05	113.036	6.74	M+H	ESI+	30	55.0176	70.0284	73.0392	72.044	115.05
Dihydroxyacetone Phosphate	C00111	HMDB0001473	C3H7O6P	169.998	171.005	168.991	11.58	M-H	ESI-	20	96.9688	78.9584	168.948	168.991	89.4961
Diosgenin	C08898	NA	C27H42O3	414.313	415.321	413.306	3.71	M-H	ESI-	20	85.0289	413.267	97.0289	133.065	115.039
Diosmetin	C10038	HMDB0029676	C16H12O6	300.063	301.071	299.056	4.35	M+H	ESI+	50	286.048	258.053	301.071	229.05	153.018
Diosmin	C10039	HMDB0029548	C28H32O15	608.174	609.181	607.167	6.86	M+H	ESI+	20	463.123	301.07	609.181	85.0279	129.054
D-Ornithine	C00515	HMDB0003374	C5H12N2O2	132.09	133.097	131.083	17.94	M+H	ESI+	20	70.0647	116.07	115.086	133.097	70.0714
D-Pinitol	C03844	HMDB0034219	C7H14O6	194.079	195.086	193.072	11.76	M-H	ESI-	20	161.045	193.071	193.017	101.024	175.006
dTDP	C00363	HMDB0001274	C10H16N2O11P2	402.023	403.03	401.016	11.64	M-H	ESI-	30	158.925	78.9587	401.014	274.972	383.004
D-Tryptophan	C00525	HMDB0013609	C11H12N2O2	204.09	205.097	203.083	10.91	M-H	ESI-	30	116.05	74.0242	142.066	72.0086	203.082
dTTP	C00459	HMDB0001342	C10H17N2O14P3	481.989	482.997	480.982	12.35	M-H	ESI-	30	158.925	383.004	480.981	401.014	176.935
dUMP	C00365	HMDB0001409	C9H13N2O8P	308.041	309.048	307.034	10.76	M-H	ESI-	20	307.033	195.006	111.019	78.9586	176.995
Emodin	C10343	HMDB0035214	C15H10O5	270.053	271.06	269.046	3.77	M-H	ESI-	50	225.055	269.045	241.05	197.06	181.065
Epicatechin	C09727	HMDB0001871	C15H14O6	290.079	291.086	289.072	10.06	M-H	ESI-	30	245.082	289.071	203.071	125.024	109.029
Ergothioneine	C05570	HMDB0003045	C9H15N3O2S	229.088	230.096	228.081	12.95	M+H	ESI+	20	186.106	127.032	60.0805	230.096	230.139
Eriocitrin	C09732	HMDB0005811	C27H32O15	596.174	597.181	595.167	8.91	M-H	ESI-	20	287.057	595.168	288.06	596.172	597.174
Erythritol	C00503	HMDB0002994	C4H10O4	122.058	123.065	121.051	10.91	M-H	ESI-	20	71.0133	59.0134	121.013	89.0238	121.029
Ethyl 3-Indoleacetate	CSID12523	HMDB0304946	C12H13NO2	203.095	204.102	202.087	3.98	M-H	ESI-	20	202.086	130.066	146.06	178.19	52.0864
Ethyl propionate	CSID7463	HMDB0030058	C5H10O2	102.068	103.075	101.061	4.9	M-H	ESI-	20	101.06	57.0341	59.9668	56.9953	101.006
FAD	C00016	HMDB0001248	C27H33N9O15P2	785.157	786.164	784.15	9.44	M-H	ESI-	30	346.054	437.085	180.99	96.9691	408.01
Ferulate	C01494	HMDB0000954	C10H10O4	194.058	195.065	193.051	6.25	M-H	ESI-	20	134.037	193.05	149.06	178.027	117.034
Flavin Mononucleotide	C00061	HMDB0001520	C17H21N4O9P	456.105	457.112	455.097	9.93	M-H	ESI-	30	96.9694	78.9588	213.017	455.098	199.001
Flavone	C15608	HMDB0003075	C15H10O2	222.068	223.075	221.061	4.03	M+H	ESI+	50	223.075	95.0487	121.028	103.054	129.033
Folate	C00504	HMDB0000121	C19H19N7O6	441.14	442.147	440.132	12.06	M-H	ESI-	30	440.131	311.089	396.141	422.12	293.078
Formononetin	C00858	HMDB0005808	C16H12O4	268.074	269.081	267.066	4.2	M+H	ESI+	50	269.08	213.09	226.061	237.054	253.049
Fructose 6-Phosphate	C00085	HMDB0000124	C6H13O9P	260.03	261.037	259.022	12	M-H	ESI-	20	96.9693	78.9587	259.022	138.98	168.99
Fucose	C01019	HMDB0000174	C6H12O5	164.068	165.076	163.061	7.02	M+H	ESI+	30	165.021	69.0331	83.06	124.086	165.113
Fumarate	C00122	HMDB0000134	C4H4O4	116.011	117.018	115.004	12.09	M-H	ESI-	20	71.0134	115.003	71.0181	71.0201	73.0404
Furan-2,5-dicarboxylate	C20450	HMDB0004812	C6H4O5	156.006	157.013	154.999	11.89	M-H	ESI-	20	111.008	154.947	83.0133	67.0185	111.022
Galactarate	C00879	HMDB0000639	C6H10O8	210.038	211.045	209.03	11.97	M-H	ESI-	30	85.0289	71.0133	59.0134	57.0341	133.013
Galactitol	C01697	HMDB0000107	C6H14O6	182.079	183.086	181.072	12.3	M-H	ESI-	30	101.024	71.0133	59.0134	89.0238	181.071
Galactonate	C00880	HMDB0000565	C6H12O7	196.058	197.066	195.051	11.27	M-H	ESI-	20	195.05	75.0082	129.019	159.029	176.928
Galactosamine	C02262	-	C6H13NO5	179.079	180.087	178.072	13.2	M+H	ESI+	20	72.0442	162.076	96.0442	126.055	144.066
Galactose	C00124	HMDB0000143	C6H12O6	180.063	181.071	179.056	12.62	M-H	ESI-	20	71.0133	59.0133	89.0237	178.983	113.024
Galactose 1-Phosphate	C00446	HMDB0000645	C6H13O9P	260.03	261.037	259.022	11.98	M-H	ESI-	30	78.9585	96.969	259.022	138.98	241.012
Galacturonate	C08348	HMDB0003402	C6H10O7	194.043	195.05	193.035	12.1	M-H	ESI-	20	72.9925	113.024	59.0134	71.0133	89.0237
Gallate	C01424	HMDB0005807	C7H6O5	170.022	171.029	169.014	4.00327	M-H	ESI-	20	169.014	125.024	151.003	168.949	97.0292
Gamma-Aminobutyrate	C00334	HMDB0000112	C4H9NO2	103.063	104.071	102.056	13.5	M+H	ESI+	30	87.0437	69.0331	86.0597	68.0492	58.0649
Gamma-Glutamylphenylalanine	CSID99868	HMDB0000594	C14H18N2O5	294.122	295.129	293.114	9.83	M+H	ESI+	20	166.086	120.08	295.129	278.102	232.096
Gamma-Terpinene	C09900	HMDB0005806	C10H16	136.125	137.133	135.118	3.53	M+H	ESI+	50	137.107	55.054	81.0569	96.0805	79.0539
Ganoderate A	CSID413668	HMDB0034931	C30H44O7	516.309	517.316	515.301	3.97	M-H	ESI-	50	285.15	299.165	301.181	497.29	300.173
GDP-Mannose	C00096	HMDB0001163	C16H25N5O16P2	605.077	606.084	604.07	12.69	M-H	ESI-	30	604.068	442.016	424.006	344.039	320.977
Geniposidate	C11673	HMDB0034942	C16H22O10	374.121	375.129	373.114	10.49	M-H	ESI-	20	123.045	211.061	373.113	167.071	149.06
Genistein	C06563	HMDB0003217	C15H10O5	270.053	271.06	269.046	5.2	M+H	ESI+	50	153.018	271.06	215.07	91.054	243.065
Gentisate	C00628	HMDB0000152	C7H6O4	154.027	155.034	153.019	6.20025	M-H	ESI-	30	109.029	108.021	153.019	81.0342	95.0135
Gibberellin A3	C01699	HMDB0003559	C19H22O6	346.142	347.149	345.134	4.86	M-H	ESI-	30	143.087	221.134	239.144	345.133	71.05
Gingerol	C10462	HMDB0005783	C17H26O4	294.183	295.19	293.176	3.93	M-H	ESI-	20	292.891	274.88	293.89	275.88	236.105
Ginkgolide A	C07601	HMDB0036862	C20H24O9	408.142	409.149	407.135	4.17759	M-H	ESI-	20	407.135	351.145	363.145	72.9928	408.138
Ginkgolide B	C07602	HMDB0036861	C20H24O10	424.137	425.144	423.13	4.17	M-H	ESI-	20	367.141	368.145	423.131	395.136	72.9931
Ginkgolide C	C07603	HMDB0036860	C20H24O11	440.132	441.139	439.125	4.45	M-H	ESI-	20	383.135	384.138	72.9929	439.125	321.134
Glabridin	C10421	HMDB0034188	C20H20O4	324.136	325.143	323.129	3.94	M-H	ESI-	50	201.091	135.044	323.201	107.05	109.029
Gluconate	C00257	HMDB0000625	C6H12O7	196.058	197.066	195.051	11.01	M-H	ESI-	30	75.0082	129.019	195.051	59.0134	99.0082
Glucosaminate	C03752	-	C6H13NO6	195.074	196.082	194.067	13.62	M+H	ESI+	30	132.065	72.0441	114.055	74.0234	85.0281
Glucosamine	C00329	HMDB0001514	C6H13NO5	179.079	180.087	178.072	12.8	M+H	ESI+	20	162.076	84.044	72.044	60.0441	144.065
Glucosamine 1-Phosphate	C06156	HMDB0001109	C6H14NO8P	259.046	260.053	258.038	12.43	M-H	ESI-	30	78.9585	258.038	257.961	96.969	239.951
Glucosamine 6-Sulfate	C04132	HMDB0000592	C6H13NO8S	259.036	260.043	258.029	12.15	M-H	ESI-	30	198.991	258.029	138.97	96.9596	168.981
Glucosamine-6-Phosphate	C00352	HMDB0001254	C6H14NO8P	259.046	260.053	258.038	12.44	M-H	ESI-	20	96.969	258.038	199.001	240.027	78.9584
Glucose	C00031	HMDB0003345	C6H12O6	180.063	181.071	179.056	12.61	M-H	ESI-	20	59.0133	71.0133	178.983	89.0237	101.024
Glucose 1-phosphate	C00103	HMDB0001586	C6H13O9P	260.03	261.037	259.022	11.95	M-H	ESI-	20	259.022	78.9586	241.012	96.9691	138.98
Glucose 6-Phosphate	C00092	HMDB0001401	C6H13O9P	260.03	261.037	259.022	12.46	M+H	ESI+	30	98.9838	127.039	236.929	109.028	85.028
Glucuronate	C00191	HMDB0000127	C6H10O7	194.043	195.05	193.035	11.99	M-H	ESI-	20	113.024	72.9925	59.0134	85.0289	71.0133
Glutamate	C00025	HMDB0000148	C5H9NO4	147.053	148.06	146.046	11.66	M+H	ESI+	20	84.0439	102.054	130.049	148.06	85.0278
Glutamine	C00064	HMDB0000641	C5H10N2O3	146.069	147.076	145.062	12.85	M+H	ESI+	20	130.049	84.0439	101.07	147.076	102.054
Glutarate	C00489	HMDB0000661	C5H8O4	132.042	133.05	131.035	11.25	M-H	ESI-	20	87.0445	131.034	113.024	69.034	54.9347
Glutaryl-L-carnitine	CID53252330	HMDB0013130	C12H21NO6	276.144	277.151	275.137	11.2	M+H	ESI+	30	85.0284	115.039	60.0808	276.144	217.071
Glutathione Reduced	C00051	HMDB0000125	C10H17N3O6S	307.084	308.091	306.077	11.35	M+H	ESI+	20	179.048	162.021	76.0211	233.058	308.09
Glycerate	C00258	HMDB0000139	C3H6O4	106.027	107.034	105.019	9.72	M-H	ESI-	30	72.9926	105.019	59.0134	105.045	75.0082
Glycerol 3-Phosphate	C00093	HMDB0000126	C3H9O6P	172.014	173.021	171.006	11.55	M-H	ESI-	20	78.9585	171.006	96.9691	171.139	171.102
Glycerophosphocholine	C00670	HMDB0000086	C8H20NO6P	257.103	258.11	256.096	12.92	M-H	ESI-	30	182.058	78.9585	256.095	256.235	152.995
Glycochenodeoxycholate	C05466	HMDB0000637	C26H43NO5	449.314	450.321	448.307	4.2	M-H	ESI-	50	74.0244	448.307	386.306	384.291	84.0452
Glycocholate	C01921	HMDB0000138	C26H43NO6	465.309	466.316	464.302	4.87	M-H	ESI-	50	74.0245	464.302	402.301	400.286	420.312
Glycolate	C00160	HMDB0000115	C2H4O3	76.016	77.0233	75.0087	6.08	M-H	ESI-	20	75.008	75.9614	74.99	59.9668	50.6442
Glycyrrhetinate	C02283	HMDB0011628	C30H46O4	470.34	471.347	469.332	3.74	M-H	ESI-	50	469.334	425.344	470.338	426.347	471.34
Glycyrrhizin	C02284	HMDB0029843	C42H62O16	822.404	823.411	821.396	4.61	M-H	ESI-	30	821.396	351.057	822.4	193.035	175.025
GMP	C00144	HMDB0001397	C10H14N5O8P	363.058	364.065	362.051	12.42	M-H	ESI-	30	78.9587	211.001	362.05	96.9693	150.042
Gossypol	C07667	HMDB0040723	C30H30O8	518.194	519.201	517.187	3.51	M-H	ESI-	30	517.187	489.193	499.177	259.098	471.182
Guanidinoacetate	C00581	HMDB0000128	C3H7N3O2	117.054	118.061	116.047	13.58	M+H	ESI+	30	72.0553	76.0389	73.0392	55.0288	101.034
Guanidinosuccinate	C03139	HMDB0003157	C5H9N3O4	175.059	176.067	174.052	12.19	M-H	ESI-	20	132.03	88.0398	155.946	174.051	114.019
Guanine	C00242	HMDB0000132	C5H5N5O	151.049	152.057	150.042	11.17	M+H	ESI+	30	152.057	153.041	135.03	110.035	124.087
Guanosine	C00387	HMDB0000133	C10H13N5O5	283.092	284.099	282.084	11.5	M+H	ESI+	50	152.057	153.041	135.03	110.035	128.045
Guanosine Triphosphate	C00044	HMDB0001273	C10H16N5O14P3	522.991	523.998	521.983	13.62	M-H	ESI-	30	158.925	424.005	521.982	176.935	442.016
Gulose	C15923	HMDB0012326	C6H12O6	180.063	181.071	179.056	12.37	M-H	ESI-	20	59.0133	178.983	71.0132	89.0236	101.024
Harmaline	C06536	HMDB0030310	C13H14N2O	214.111	215.118	213.103	9.74	M-H	ESI-	20	213.076	212.901	213.185	212.935	168.989
Hesperetin	C01709	HMDB0005782	C16H14O6	302.079	303.086	301.072	4.24	M-H	ESI-	20	301.216	301.145	178.17	274.925	57.4387
Hesperetin 7-Neohesperidoside	C09806	HMDB0030748	C28H34O15	610.19	611.197	609.182	6.79	M-H	ESI-	30	301.073	609.186	610.189	302.076	343.084
Hesperidine	C09755	HMDB0003265	C28H34O15	610.19	611.197	609.182	6.82	M-H	ESI-	20	301.073	609.186	302.076	610.189	303.078
Hexanoate	C01585	HMDB0000535	C6H12O2	116.084	117.091	115.076	4.74	M-H	ESI-	20	115.076	71.0497	114.935	59.0134	115.039
Hippurate	C01586	HMDB0000714	C9H9NO3	179.058	180.065	178.051	5.02492	M-H	ESI-	30	134.061	132.046	178.051	56.014	93.0344
Hispidulin	C10058	HMDB0128581	C16H12O6	300.063	301.071	299.056	5.84	M+H	ESI+	30	234.939	252.95	178.191	301.221	178.213
Histamine	C00388	HMDB0000870	C5H9N3	111.08	112.087	110.072	21.49	M+H	ESI+	20	95.0598	112.086	83.0599	68.0491	112.096
Homocysteine	C00155	HMDB0000742	C4H9NO2S	135.035	136.043	134.028	13.14	M+H	ESI+	30	90.0368	56.0492	136.112	73.0104	90.0432
Homocysteine Thiolactone	CSID96881	HMDB0002287	C4H7NOS	117.025	118.032	116.018	5.36	M+H	ESI+	30	56.0492	90.0368	100.021	73.0103	118.086
Homogentisate	C00544	HMDB0000130	C8H8O4	168.042	169.05	167.035	6.99	M+H	ESI+	20	169.072	50.172	53.812	54.3614	54.7541
Homovanillate	C05582	HMDB0000118	C9H10O4	182.058	183.065	181.051	7.47	M-H	ESI-	20	180.981	180.908	181.052	50.13	52.4229
Homoveratrate	CSID6872	HMDB0000434	C10H12O4	196.074	197.081	195.066	4.88	M-H	ESI-	30	136.053	176.929	121.029	76.9695	194.905
Hydrocinnamic Acid	C05629	HMDB0000764	C9H10O2	150.068	151.075	149.061	3.81	M-H	ESI-	30	148.952	79.957	149.009	138.952	148.973
Hydroquinone	C00530	HMDB0002434	C6H6O2	110.037	111.044	109.029	6.06	M-H	ESI-	30	108.021	109.029	81.034	67.0296	50.0032
Hydroxykynurenine	C02794	HMDB0000732	C10H12N2O4	224.08	225.087	223.072	11.8	M+H	ESI+	20	208.06	110.06	162.055	166.049	152.07
Hydroxytyrosol	CSID74680	HMDB0005784	C8H10O3	154.063	155.07	153.056	6.66	M+H	ESI+	20	58.0649	155.154	56.2676	50.6654	51.3307
Hypotaurine	C00519	HMDB0000965	C2H7NO2S	109.02	110.027	108.012	13.06	M+H	ESI+	30	92.016	110.026	110.071	110.06	74.0056
Hypoxanthine	C00262	HMDB0000157	C5H4N4O	136.039	137.046	135.031	9.64	M+H	ESI+	50	110.035	119.035	55.0289	137.045	94.0396
IDP	C00104	HMDB0003335	C10H14N4O11P2	428.013	429.021	427.006	12.63	M-H	ESI-	30	135.031	158.925	427.004	329.028	78.9587
IMP	C00130	HMDB0000175	C10H13N4O8P	348.047	349.054	347.04	11.72	M-H	ESI-	30	78.9585	96.969	347.039	135.03	178.191
Imperatorin	C09269	HMDB0034376	C16H14O4	270.089	271.097	269.082	3.89	M-H	ESI-	30	268.907	269.045	269.212	269.246	250.897
Indole-3-Acetate	C00954	HMDB0000197	C10H9NO2	175.063	176.071	174.056	7.68	M-H	ESI-	20	130.066	155.947	174.056	173.957	128.05
Indole-3-acetyl-aspartate	CSID3845644	HMDB0038666	C14H14N2O5	290.09	291.098	289.083	10.38	M-H	ESI-	30	288.881	232.924	270.871	178.168	178.19
Indole-3-aldehyde	C08493	HMDB0029737	C9H7NO	145.053	146.06	144.046	4.6	M-H	ESI-	50	144.045	126.035	116.05	65.9982	142.03
Indole-3-butyrate	C11284	HMDB0002096	C12H13NO2	203.095	204.102	202.087	5.02	M-H	ESI-	30	116.05	158.097	202.087	184.077	129.058
Indole-3-carboxylate	C19837	HMDB0003320	C9H7NO2	161.048	162.055	160.04	8.27	M-H	ESI-	20	116.05	160.04	116.06	116.064	160.063
Indole-3-Ethanol	C00955	HMDB0003447	C10H11NO	161.084	162.091	160.077	4.57	M+H	ESI+	20	144.081	162.091	117.07	143.073	130.065
Indole-3-Methyl Acetate	C20635	HMDB0029738	C11H11NO2	189.079	190.086	188.072	4.07	M+H	ESI+	30	116.07	98.0597	69.0332	166.022	70.0366
Indole-3-propionate	CSID3613	HMDB0002302	C11H11NO2	189.079	190.086	188.072	5.89	M-H	ESI-	20	59.0134	188.071	116.05	142.066	144.081
Indole-3-Pyruvate	C00331	HMDB0060484	C11H9NO3	203.058	204.066	202.051	4.87	M+H	ESI+	20	174.972	197.988	130.086	204.066	178.192
Indoleacetaldehyde	C00637	HMDB0001190	C10H9NO	159.068	160.076	158.061	4.23	M-H	ESI-	30	130.066	128.05	158.06	134.972	157.943
Indoleacrylate	C21283	HMDB0000734	C11H9NO2	187.063	188.071	186.056	6.56	M-H	ESI-	20	142.066	186.055	116.05	51.0465	53.253
Indolelactate	C02043	HMDB0000671	C11H11NO3	205.074	206.081	204.067	6	M-H	ESI-	30	158.061	142.066	116.05	128.05	72.9927
Indoxyl Sulfate	C08481	HMDB0000682	C8H7NO4S	213.01	214.017	212.002	4.89036	M-H	ESI-	30	79.9569	80.9646	132.045	212.002	92.05
Inosine	C00294	HMDB0000195	C10H12N4O5	268.081	269.088	267.073	10.29	M-H	ESI-	30	135.031	267.073	177.041	92.0247	149.046
Isocitrate	C00311	HMDB0000193	C6H8O7	192.027	193.034	191.02	13.11	M-H	ESI-	20	111.008	173.009	191.019	85.0291	154.998
Isoeugenol	C10469	HMDB0005802	C10H12O2	164.084	165.091	163.076	3.6	M+H	ESI+	30	165.021	69.0331	83.06	124.086	148.087
Isoliquiritigenin	C08650	HMDB0037316	C15H12O4	256.074	257.081	255.066	4.57	M-H	ESI-	20	255.232	254.906	255.906	255.088	55.2001
Isonicotinate	C07446	HMDB0060665	C6H5NO2	123.032	124.039	122.025	7.03	M+H	ESI+	50	80.0491	96.044	53.0384	124.039	79.0413
Isoxanthopterin	C03975	HMDB0000704	C6H5N5O2	179.044	180.052	178.037	11.03	M-H	ESI-	30	136.015	178.037	154.947	161.01	135.031
Itaconate	C00490	HMDB0002092	C5H6O4	130.027	131.034	129.019	11.2873	M-H	ESI-	20	85.0289	129.019	54.2523	54.7645	57.0342
ITP	C00081	HMDB0000189	C10H15N4O14P3	507.98	508.987	506.972	13.07	M-H	ESI-	30	158.925	408.996	506.973	176.936	427.006
Kaempferol	C05903	HMDB0005801	C15H10O6	286.048	287.055	285.04	5.87	M+H	ESI+	30	287.055	178.214	239.99	221.981	220.98
Kojate	C14516	HMDB0032923	C6H6O4	142.027	143.034	141.019	8.25	M+H	ESI+	50	69.0332	113.023	97.028	55.0176	51.0227
Kynurenate	C01717	HMDB0000715	C10H7NO3	189.043	190.05	188.035	4.9	M+H	ESI+	20	190.05	162.055	190.087	116.07	190.106
Kynurenine	C00328	HMDB0000684	C10H12N2O3	208.085	209.092	207.077	10.39	M+H	ESI+	20	94.0647	192.065	146.06	136.075	150.054
Lactose	C00243	HMDB0000186	C12H22O11	342.116	343.124	341.109	13.2536	M-H	ESI-	20	161.046	101.024	71.0135	97.0293	73.0292
L-Alanine	C00041	HMDB0000161	C3H7NO2	89.0477	90.055	88.0404	12.89	M+H	ESI+	20	72.0803	90.0908	90.0544	70.0647	50.9346
L-Allothreonine	C05519	HMDB0004041	C4H9NO3	119.058	120.066	118.051	12.5582	M+H	ESI+	20	56.0491	74.0596	102.054	84.0439	120.065
L-Arginine	C00062	HMDB0000517	C6H14N4O2	174.112	175.119	173.104	19.78	M+H	ESI+	30	70.0649	60.0553	116.07	174.972	130.097
Lauroyl-L-carnitine	CSID147288	HMDB0002250	C19H38NO4	344.28	345.287	343.273	4.86	M-H	ESI-	20	200.173	199.17	328.244	343.267	241.236
L-Carnitine	C00318	HMDB0000062	C7H15NO3	161.105	162.112	160.098	12.66	M+H	ESI+	30	103.039	162.113	60.0806	85.0282	102.091
L-Citrulline	C00327	HMDB0000904	C6H13N3O3	175.096	176.103	174.088	13.3752	M+H	ESI+	20	159.077	113.071	70.0649	115.086	116.07
L-Cystathionine	C02291	HMDB0000099	C7H14N2O4S	222.067	223.075	221.06	13.38	M-H	ESI-	30	134.027	120.012	178.983	221.03	221.154
L-Cysteine	C00097	HMDB0000574	C3H7NO2S	121.02	122.027	120.012	12.6786	M-H	ESI-	20	120.017	77.969	120.056	95.9797	70.0295
L-Dopa	C00355	HMDB0000181	C9H11NO4	197.069	198.076	196.062	14.53	M-H	ESI-	20	196.061	135.044	179.034	72.0083	122.036
Lenticin	C09213	HMDB0061115	C14H18N2O2	246.137	247.144	245.13	9.41	M+H	ESI+	20	188.071	60.0808	146.06	247.144	144.081
Leucine	C00123	HMDB0000687	C6H13NO2	131.095	132.102	130.087	10.42	M+H	ESI+	20	86.096	132.101	58.0648	69.0695	87.0439
Levoglucosan	CSID9587432	HMDB0000640	C6H10O5	162.053	163.06	161.046	9.33	M-H	ESI-	20	71.0132	101.024	85.0288	113.024	73.0288
L-Gulonolactone	C05410	-	C6H10O6	178.048	179.055	177.04	11.28	M-H	ESI-	20	176.929	177.04	89.0239	129.019	59.0134
L-Histidine	C00135	HMDB0000177	C6H9N3O2	155.069	156.077	154.062	13.19	M-H	ESI-	30	93.0452	154.947	154.062	137.035	110.072
L-Homocystine	C01817	HMDB0000575	C8H16N2O4S2	268.055	269.062	267.048	13.14	M-H	ESI-	20	132.012	134.027	72.0084	114.985	267.047
L-Homoserine	C00263	HMDB0000719	C4H9NO3	119.058	120.066	118.051	12.91	M+H	ESI+	20	74.0597	56.0492	120.065	102.055	74.0234
L-Iditol	C01507	HMDB0011632	C6H14O6	182.079	183.086	181.072	12.15	M-H	ESI-	30	59.0134	71.0133	73.029	101.024	89.0239
Limonene	C00521	HMDB0004321	C10H16	136.125	137.133	135.118	3.65	M+H	ESI+	50	137.107	55.054	81.057	79.0539	96.0804
Limonin	C03514	HMDB0035921	C26H30O8	470.194	471.201	469.187	3.89	M-H	ESI-	20	469.189	470.192	229.124	381.209	271.136
Lipoamide	C00248	HMDB0000962	C8H15NOS2	205.06	206.067	204.052	4.37	M+H	ESI+	20	189.04	161.045	101.042	171.029	127.057
Lipoic Acid	C16241	HMDB0001451	C8H14O2S2	206.044	207.051	205.036	4.47	M-H	ESI-	20	171.048	85.0289	205.119	64.952	127.058
L-Isoleucine	C00407	HMDB0000172	C6H13NO2	131.095	132.102	130.087	10.76	M+H	ESI+	50	69.0696	86.0961	57.0571	56.0493	58.0649
L-Lysine	C00047	HMDB0000182	C6H14N2O2	146.106	147.113	145.098	19.19	M+H	ESI+	20	84.0802	130.086	147.112	69.0331	129.102
L-Norleucine	C01933	HMDB0001645	C6H13NO2	131.095	132.102	130.087	10.37	M+H	ESI+	20	58.0649	132.102	132.047	72.0805	50.1716
L-Norvaline	C01799	HMDB0013716	C5H11NO2	117.079	118.086	116.072	11.33	M+H	ESI+	30	72.0805	118.086	59.0727	58.0649	55.054
L-Ornithine	C00077	HMDB0000214	C5H12N2O2	132.09	133.097	131.083	17.95	M+H	ESI+	20	70.0647	116.07	115.086	70.0714	133.097
L-Proline	C00148	HMDB0000162	C5H9NO2	115.063	116.071	114.056	12.18	M+H	ESI+	20	70.0647	116.07	70.0693	70.0714	98.0597
L-Serine	C00065	HMDB0000187	C3H7NO3	105.043	106.05	104.035	13.2082	M+H	ESI+	20	60.044	88.0387	106.049	60.0477	60.0492
L-Theanine	C01047	HMDB0034365	C7H14N2O3	174.1	175.108	173.093	11.17	M+H	ESI+	20	158.081	84.0441	129.102	130.049	175.107
L-Tryptophanamide	C00977	HMDB0013318	C11H13N3O	203.106	204.113	202.099	6.34	M-H	ESI-	30	202.098	130.066	71.0246	129.058	73.0403
Lumichrome	C01727	HMDB0254199	C12H10N4O2	242.08	243.088	241.073	4.7	M+H	ESI+	50	172.087	198.066	216.076	170.071	145.076
Luteolin	C01514	HMDB0005800	C15H10O6	286.048	287.055	285.04	6.59	M-H	ESI-	30	284.266	178.191	285.269	85.0289	285.041
L-Valine	C00183	HMDB0000883	C5H11NO2	117.079	118.086	116.072	11.58	M+H	ESI+	50	55.054	72.0805	58.0649	57.057	59.0727
Lyxose	C00476	-	C5H10O5	150.053	151.06	149.046	11.54	M-H	ESI-	20	59.0133	71.0133	89.0237	148.952	94.9799
Madecassoside	CSID142124	HMDB0040122	C48H78O20	974.509	975.516	973.501	9.34	M-H	ESI-	20	469.159	503.34	973.505	470.161	504.344
Malate	C00149	HMDB0031518	C4H6O5	134.022	135.029	133.014	11.85	M-H	ESI-	30	71.0133	115.003	72.9926	133.014	89.0238
Maleamate	C01596	-	C4H5NO3	115.027	116.034	114.02	8.85	M-H	ESI-	20	70.0292	114.019	72.0086	52.0932	52.4863
Maleate	C01384	HMDB0000176	C4H4O4	116.011	117.018	115.004	6.27	M-H	ESI-	20	71.0134	115.003	71.0181	71.02	50.4892
Malonyl-CoA	C00083	HMDB0001175	C24H38N7O19P3S	853.116	854.123	852.108	12.82	M+H	ESI+	20	347.126	854.119	428.035	245.058	303.136
Maltose	C00208	HMDB0000163	C12H22O11	342.116	343.124	341.109	13.2008	M-H	ESI-	20	101.024	161.045	71.0133	89.0238	221.066
Maltotetraose	C02052	HMDB0001296	C24H42O21	666.222	667.229	665.215	13.7636	M-H	ESI-	20	161.045	341.108	545.171	179.056	383.119
Maltotriose	C01835	HMDB0001262	C18H32O16	504.169	505.176	503.162	13.5369	M-H	ESI-	20	161.046	179.056	101.024	383.119	221.067
Mandelate	C01984	HMDB0000703	C8H8O3	152.047	153.055	151.04	4.89	M-H	ESI-	30	107.05	151.04	150.937	121.029	51.7312
Mannosamine	C03570	-	C6H13NO5	179.079	180.087	178.072	12.68	M+H	ESI+	20	162.076	84.0441	72.044	144.065	60.0441
Mannose	C00159	HMDB0000169	C6H12O6	180.063	181.071	179.056	12.27	M-H	ESI-	20	59.0133	71.0133	89.0238	178.983	101.024
Mannose 6-Phosphate	C00275	HMDB0001078	C6H13O9P	260.03	261.037	259.022	12.22	M+H	ESI+	20	109.028	98.9837	127.038	243.026	225.015
Matairesinol	C10682	HMDB0035698	C20H22O6	358.142	359.149	357.134	4.04	M-H	ESI-	30	83.0135	357.134	137.06	342.11	221.081
Melanin	C05606	HMDB0004068	C18H10N2O4	318.064	319.071	317.057	14.64	M-H	ESI-	30	280.848	298.858	236.903	281.847	299.858
Melatonin	C01598	HMDB0001389	C13H16N2O2	232.121	233.128	231.114	4.41	M-H	ESI-	30	216.09	144.045	231.113	58.0294	145.053
Melibiose	C05402	HMDB0000048	C12H22O11	342.116	343.124	341.109	13.42	M-H	ESI-	20	221.066	89.0238	101.024	179.056	71.0133
Menadione	C05377	HMDB0001892	C11H8O2	172.052	173.06	171.045	3.42	M-H	ESI-	30	171.067	65.0141	144.056	178.17	89.0138
Mesoxalate	C00830	HMDB0031522	C3H2O5	117.99	118.998	116.983	13.1	M-H	ESI-	30	116.928	73.0289	99.9252	60.9927	60.9747
Metanephrine	C05588	HMDB0004063	C10H15NO3	197.105	198.112	196.098	14.57	M+H	ESI+	30	180.102	165.078	148.076	120.081	174.973
Methionine	C00073	HMDB0000696	C5H11NO2S	149.051	150.058	148.044	10.87	M+H	ESI+	20	104.053	56.0493	133.032	61.0104	102.055
Methionine Sulfoximine	C03510	-	C5H12N2O3S	180.057	181.064	179.05	12.04	M-H	ESI-	50	61.9701	78.0013	154.947	178.983	76.9694
Methyl 3-Indolyacetate	CSID67279	HMDB0029738	C11H11NO2	189.079	190.086	188.072	4.14	M-H	ESI-	30	146.06	130.066	188.071	160.04	128.05
Methyl Cinnamate	C06358	HMDB0033833	C10H10O2	162.068	163.075	161.061	3.8	M-H	ESI-	20	160.973	161.083	60.9927	134.035	161.046
Methyl Galactoside	C03619	-	C7H14O6	194.079	195.086	193.072	10.56	M-H	ESI-	30	59.0134	71.0133	101.024	192.987	85.0289
Methyl Nicotinate	CSID21111785	HMDB0029806	C7H7NO2	137.048	138.055	136.04	11.67	M+H	ESI+	20	138.054	120.047	96.0551	138.11	96.9947
Methyl Vanillate	CSID18696	HMDB0240266	C9H10O4	182.058	183.065	181.051	4.18	M-H	ESI-	50	107.013	151.003	123.008	125.024	81.034
Methyl-4-Aminobutyrate	CSID17580	-	C5H11NO2	117.079	118.086	116.072	13.73	M+H	ESI+	20	101.059	59.0488	118.086	86.0596	69.0331
Methylcysteine	CSID22826	HMDB0002108	C4H9NO2S	135.035	136.043	134.028	10.99	M+H	ESI+	20	119.016	73.028	77.0051	90.0367	74.9895
Methylguanidine	C02294	HMDB0001522	C2H7N3	73.064	74.0713	72.0567	21.45	M+H	ESI+	30	57.0444	74.096	74.0709	56.0493	50.012
Methylmalonyl-CoA	C00683	HMDB0001269	C25H40N7O19P3S	867.607	868.614	866.6	12.5988	M-H	ESI-	20	822.135	866.124	408.011	426.022	848.113
Methylparaben	D01400	HMDB0032572	C8H8O3	152.047	153.055	151.04	4.26	M-H	ESI-	30	150.937	50.8036	51.28	51.6285	51.6913
Methylsuccinic acid	CSID9922	HMDB0001844	C5H8O4	132.042	133.05	131.035	10.76	M-H	ESI-	20	87.0445	131.034	113.024	87.0507	69.034
Methylthioadenosine	C00170	HMDB0001173	C11H15N5O3S	297.09	298.097	296.082	6.16	M+H	ESI+	20	136.061	298.097	163.042	145.031	97.0279
Mevalolactone	CSID9999	HMDB0006024	C6H10O3	130.063	131.07	129.056	5.03	M+H	ESI+	20	69.0695	71.0487	113.059	131.07	89.0593
Mevalonate	C00418	HMDB0000227	C6H12O4	148.074	149.081	147.066	7.47	M+H	ESI+	30	149.023	121.028	65.0383	121.039	93.0333
Mevalonolactone	CSID4483406	HMDB0006024	C6H10O3	130.063	131.07	129.056	5.05	M+H	ESI+	20	69.0696	71.0488	113.059	131.07	89.0593
Monomethylglutarate	CSID66550	HMDB0000858	C6H10O4	146.058	147.065	145.051	4.72617	M-H	ESI-	20	69.034	113.024	56.9953	73.029	59.0134
Monotropein	C09788	HMDB0035608	C16H22O11	390.116	391.124	389.109	11.16	M-H	ESI-	20	191.035	389.108	227.056	165.055	147.045
Morin	C10105	HMDB0030796	C15H10O7	302.043	303.05	301.035	7.07448	M-H	ESI-	20	301.034	151.003	125.024	229.05	163.003
Myoinositol	C00137	HMDB0000211	C6H12O6	180.063	181.071	179.056	13.76	M-H	ESI-	30	87.0082	161.045	99.0082	179.056	71.0134
N,N,N-Trimethyllysine	C03793	HMDB0001325	C9H20N2O2	188.152	189.16	187.145	19.64	M+H	ESI+	20	130.086	189.16	84.0804	60.0805	165.021
N,N-Dimethyl-1,4-Phenylenediamine	C04203	HMDB0247696	C8H12N2	136.1	137.107	135.093	4.84071	M+H	ESI+	50	137.107	107.06	122.083	81.0569	121.076
N,N-Dimethylarginine	C03626	HMDB0001539	C8H18N4O2	202.143	203.15	201.136	18.06	M+H	ESI+	30	70.0649	88.0866	116.07	158.129	203.15
N2-Acetylornithine	C00437	HMDB0003357	C7H14N2O3	174.1	175.108	173.093	13.15	M+H	ESI+	20	115.086	158.081	116.07	70.0649	157.097
N6-(Delta2-Isopentenyl)-Adenine	C04083	HMDB0245646	C10H13N5	203.117	204.124	202.11	4.76	M+H	ESI+	20	136.061	204.124	148.061	187.024	204.051
NAADP	C13051	-	C21H27N6O18P3	744.059	745.067	743.052	12.78	M-H	ESI-	20	620.019	621.021	408.01	178.192	602.008
N-Acetyl Carnosine	CSID8396518	HMDB0012881	C11H16N4O4	268.117	269.124	267.11	9.64	M+H	ESI+	20	156.076	110.071	269.124	223.119	251.113
N-Acetylasparagine	CSID15903808	HMDB0006028	C6H10N2O4	174.064	175.071	173.057	9.6	M-H	ESI-	20	154.947	155.046	172.957	58.0293	114.019
N-acetylaspartate	C01042	HMDB0000812	C6H9NO5	175.048	176.055	174.041	11.12	M-H	ESI-	20	88.0399	58.0295	130.051	174.041	59.0135
N-Acetylgalactosamine	C01074	HMDB0000212	C8H15NO6	221.09	222.097	220.083	11.2	M+H	ESI+	30	174.972	163.039	58.0649	119.049	222.112
N-Acetylglucosamine	C00140	HMDB0000215	C8H15NO6	221.09	222.097	220.083	11.1969	M+H	ESI+	30	138.055	126.054	144.065	174.972	84.0441
N-Acetyl-Glucosamine 1-Phosphate	C04501	HMDB0001367	C8H16NO9P	301.056	302.064	300.049	11.76	M-H	ESI-	20	96.969	199.001	300.048	282.037	138.98
N-Acetylglutamate	C00624	HMDB0001138	C7H11NO5	189.064	190.071	188.056	10.85	M-H	ESI-	20	128.034	102.055	188.056	144.066	170.045
N-Acetylglycine	CSID10507	HMDB0000532	C4H7NO3	117.043	118.05	116.035	8.98	M+H	ESI+	30	118.086	59.0727	76.0389	58.0649	73.0283
N-Acetyl-L-alanine	CSID79449	HMDB0000766	C5H9NO3	131.058	132.066	130.051	7.8	M-H	ESI-	20	88.0397	130.05	130.042	88.0494	86.0606
N-Acetyl-L-cysteine	C06809	HMDB0001890	C5H9NO3S	163.03	164.038	162.023	6.32	M-H	ESI-	20	84.0448	162.066	135.055	120.056	162.021
N-Acetyl-L-leucine	C02710	HMDB0011756	C8H15NO3	173.105	174.112	172.098	4.67065	M+H	ESI+	20	174.127	115.075	174.148	61.2696	96.3135
N-Acetyl-mannosamine	C00645	HMDB0001129	C8H15NO6	221.09	222.097	220.083	11.32	M+H	ESI+	30	126.054	138.054	84.044	144.065	174.972
N-Acetyl-methionine	C02712	HMDB0011745	C7H13NO3S	191.062	192.069	190.054	4.91	M-H	ESI-	30	148.043	142.05	84.0449	98.0605	112.04
N-Acetylneuraminic acid	C19910	HMDB0000230	C11H19NO9	309.106	310.113	308.099	10.85	M-H	ESI-	30	87.0082	170.046	98.0606	59.0134	126.056
N-Acetylphenylalanine	C03519	HMDB0000512	C11H13NO3	207.09	208.097	206.082	4.81	M-H	ESI-	20	164.071	206.082	58.0294	147.045	70.0294
N-Acetylproline	CSID59528	HMDB0094701	C7H11NO3	157.074	158.081	156.067	7.72	M+H	ESI+	20	70.0647	112.075	116.07	158.081	70.0693
N-Acetylputrescine	C02714	HMDB0002064	C6H14N2O	130.111	131.118	129.103	17.85	M+H	ESI+	20	72.0803	114.091	60.0552	114.102	131.129
N-Acetylserine	CSID312807	HMDB0002931	C5H9NO4	147.053	148.06	146.046	9.21	M-H	ESI-	20	74.0241	116.035	84.0448	146.045	70.0292
N-Acetylserotonin	C00978	HMDB0001238	C12H14N2O2	218.106	219.113	217.098	5.7	M-H	ESI-	30	158.061	58.0294	217.098	131.037	146.061
N-Acetyl-tryptophan	CSID388950	HMDB0013713	C13H14N2O3	246.1	247.108	245.093	4.9	M+H	ESI+	50	146.06	159.091	132.08	118.065	130.065
N-acetyl-tyrosine	C01657	HMDB0000866	C11H13NO4	223.084	224.092	222.077	6.45	M-H	ESI-	30	180.067	58.0298	107.05	163.04	119.05
NADP	C00006	HMDB0000217	C21H28N7O17P3	743.075	744.083	742.068	12.35	M+H	ESI+	20	604.024	508.003	136.062	232.083	622.035
NADPH	C00005	HMDB0000221	C21H30N7O17P3	745.091	746.098	744.084	12.61	M-H	ESI-	30	408.012	426.022	744.086	664.119	397.021
N-Alpha-Acetyl-L-lysine	C12989	HMDB0000446	C8H16N2O3	188.116	189.123	187.109	13.09	M+H	ESI+	20	129.102	84.0806	189.123	130.086	147.113
Naringenin	C00509	HMDB0002670	C15H12O5	272.068	273.076	271.061	4.34	M-H	ESI-	30	151.003	119.05	271.061	107.013	93.0342
Naringin	C09789	HMDB0002927	C27H32O14	580.179	581.187	579.172	5.61603	M-H	ESI-	30	579.171	271.061	459.115	151.004	580.175
Narirutin	C09793	HMDB0033740	C27H32O14	580.179	581.187	579.172	6.91	M-H	ESI-	20	271.062	579.174	295.062	313.072	459.116
Neopterin	C05926	HMDB0000845	C9H11N5O4	253.081	254.088	252.074	11.57	M+H	ESI+	30	206.067	190.072	236.078	218.067	194.067
N-Ethyl-5-Methyl-2-(1-Methylethyl)-Cyclohexanecarboxamide	CSID56632	HMDB0037834	C13H25NO	211.194	212.201	210.186	3.93	M+H	ESI+	50	55.054	83.0853	69.0696	72.0441	170.154
N-Formylglycine	CSID68130	HMDB0255145	C3H5NO3	103.027	104.034	102.02	9.34	M+H	ESI+	20	58.0648	104.07	86.0596	57.0332	56.0492
N-Formyl-L-Methionine	C03145	HMDB0001015	C6H11NO3S	177.046	178.053	176.039	4.91	M-H	ESI-	20	128.035	98.0242	176.038	84.0449	132.048
N-Glycolylneuraminate	C03410	HMDB0000833	C11H19NO10	325.101	326.108	324.094	11.29	M-H	ESI-	20	116.034	87.0081	186.04	324.092	236.077
Niacinamide	C00153	HMDB0001406	C6H6N2O	122.048	123.055	121.041	6.25	M+H	ESI+	50	80.0491	96.044	53.0384	78.0336	123.055
Nicotinamide Hypoxanthine Dinucleotide	C04423	-	C21H26N6O15P2	664.093	665.1	663.086	11.95	M+H	ESI+	20	233.067	97.0282	543.051	137.045	370.993
Nicotinamide Mononucleotide	C00455	-	C11H15N2O8P	334.057	335.064	333.049	12.4383	M+H	ESI+	20	123.055	97.0279	335.063	67.2762	69.033
Nicotinate	C00253	HMDB0001488	C6H5NO2	123.032	124.039	122.025	7.11	M+H	ESI+	50	80.0491	96.044	53.0384	124.039	78.0335
Nicotine	C00745	HMDB0001934	C10H14N2	162.116	163.123	161.108	6.43	M+H	ESI+	30	132.08	130.065	105.033	163.123	106.065
N-Methylaspartate	C12269	HMDB0002393	C5H9NO4	147.053	148.06	146.046	10.92	M-H	ESI-	20	115.003	102.055	146.045	71.0133	128.035
N-Methylglutamate	C01046	HMDB0062660	C6H11NO4	161.069	162.076	160.062	10.76	M+H	ESI+	20	98.0596	116.07	144.065	162.076	85.028
N-Methyl-L-alanine	C02721	HMDB0094692	C4H9NO2	103.063	104.071	102.056	12.24	M+H	ESI+	20	58.0647	104.07	58.0683	58.0698	56.0491
Nomilin	C08773	HMDB0035772	C28H34O9	514.22	515.228	513.213	3.88042	M-H	ESI-	20	471.2	453.19	429.19	513.211	472.204
Norizalpinin	C10044	HMDB0029521	C15H10O5	270.053	271.06	269.046	4.11	M-H	ESI-	30	268.907	269.212	250.896	269.246	178.19
Normetanephrine	C05589	HMDB0000819	C9H13NO3	183.09	184.097	182.082	13.47	M-H	ESI-	20	149.047	164.071	182.082	178.17	178.19
Norspermidine	C03375	HMDB0011634	C6H17N3	131.142	132.15	130.135	4.41	M+H	ESI+	30	72.044	132.047	72.0511	58.0649	50.1716
O-Acetyl-L-carnitine	C02571	HMDB0000201	C9H17NO4	204.124	205.131	203.116	11.36	M+H	ESI+	20	85.028	204.123	60.0805	145.049	144.102
O-Acetyl-L-serine	C00979	HMDB0003011	C5H9NO4	147.053	148.06	146.046	9.46	M-H	ESI-	20	74.0241	116.035	84.0448	146.045	70.0292
Oleanolate	C17148	HMDB0002364	C30H48O3	456.36	457.368	455.353	3.67047	M-H	ESI-	50	455.355	456.358	457.361	407.334	408.337
Oleuropein	C09794	HMDB0035872	C25H32O13	540.184	541.192	539.177	6.74	M-H	ESI-	20	539.179	377.126	275.094	307.083	540.183
O-Phosphoethanolamine	C00346	HMDB0000224	C2H8NO4P	141.019	142.026	140.012	12.89	M-H	ESI-	20	78.9584	140.011	78.9638	51.7517	53.2678
O-Phosphoserine	C01005	HMDB0001721	C3H8NO6P	185.009	186.016	184.002	12.27	M-H	ESI-	20	96.9689	78.9584	184.001	52.4217	53.114
Ophthalmate	CSID5381695	HMDB0005765	C11H19N3O6	289.127	290.135	288.12	10.96	M-H	ESI-	30	195.077	159.077	226.119	128.035	74.0243
Orotate	C00295	HMDB0000226	C5H4N2O4	156.017	157.024	155.01	7.2	M-H	ESI-	30	111.02	154.947	67.0297	68.0137	136.936
O-Succinyl-L-homoserine	C01118	YMDB0000917	C8H13NO6	219.074	220.082	218.067	10.98	M+H	ESI+	20	102.055	120.065	74.0597	220.082	56.0492
Oxalate	C00209	HMDB0002329	C2H2O4	89.9953	91.0026	88.988	12.92	M-H	ESI-	30	60.9926	59.0134	88.9874	50.0082	55.8605
Oxoproline	C01879	HMDB0000267	C5H7NO3	129.043	130.05	128.035	9.12	M+H	ESI+	20	84.0439	85.0391	130.049	130.158	59.06
Palatinose	C01742	-	C12H22O11	342.116	343.124	341.109	12.8944	M-H	ESI-	20	101.024	221.067	179.056	89.0243	71.0137
Palmitoylcarnitine	C02990	HMDB0000222	C23H46NO4	400.342	401.349	399.335	4.49	M-H	ESI-	20	256.236	384.307	399.331	255.233	297.299
Pantothenate	C00864	HMDB0000210	C9H17NO5	219.111	220.118	218.103	7.15	M+H	ESI+	30	161.096	178.192	220.132	178.214	98.6663
Paraxanthine	C13747	HMDB0001860	C7H8N4O2	180.065	181.072	179.057	5.16	M-H	ESI-	50	122.035	154.947	178.983	76.9694	164.033
Pectate	C00470	HMDB0003363	C6H10O7	194.043	195.05	193.035	12.07	M-H	ESI-	20	72.9925	113.024	59.0133	71.0133	85.0289
Phenylacetaldehyde	C00601	HMDB0006236	C8H8O	120.058	121.065	119.05	4.77	M-H	ESI-	30	76.9694	119.016	94.98	101.006	60.9746
Phenylacetylglycine	C05598	HMDB0000821	C10H11NO3	193.074	194.081	192.067	4.57	M+H	ESI+	20	76.0387	91.0535	132.047	72.0438	194.08
Phenylalanine	C00079	HMDB0000159	C9H11NO2	165.079	166.086	164.072	9.82	M+H	ESI+	50	103.054	120.08	93.0694	79.0539	91.0538
Phenyllactate	C05607	HMDB0000563	C9H10O3	166.063	167.07	165.056	4.88	M-H	ESI-	30	119.05	72.9927	147.045	103.055	91.0548
Phenylpyruvate	C00166	HMDB0000205	C9H8O3	164.047	165.055	163.04	4.46	M-H	ESI-	50	91.0548	117.034	101.039	119.05	91.0615
Phloretin	C00774	HMDB0003306	C15H14O5	274.084	275.091	273.077	7.2	M-H	ESI-	30	167.035	123.045	179.035	119.05	93.0344
Phloridzin	C01604	HMDB0036634	C21H24O10	436.137	437.144	435.13	7.23	M-H	ESI-	20	273.076	435.129	167.035	274.079	125.024
Phosphocreatine	C02305	HMDB0001511	C4H10N3O5P	211.036	212.043	210.029	11.52	M+H	ESI+	20	90.0545	212.043	114.066	195.016	122.995
Phosphoenolpyruvate	C00074	HMDB0000263	C3H5O6P	167.982	168.99	166.975	13.04	M+H	ESI+	20	150.979	122.984	98.9839	169.072	168.99
Phosphonoacetate	C05682	HMDB0004110	C2H5O5P	139.987	140.995	138.98	12.92	M-H	ESI-	20	94.9897	78.9584	138.979	138.952	139.006
Phosphorylcholine	C00588	HMDB0001565	C5H14NO4P	184.074	185.081	183.067	13.04	M+H	ESI+	30	86.096	125	184.073	60.0805	98.9839
Phthalate	C01606	HMDB0002107	C8H6O4	166.027	167.034	165.019	9.99	M-H	ESI-	30	149.009	90.971	164.939	51.667	52.8545
p-Hydroxymandelate	C11527	HMDB0000822	C8H8O4	168.042	169.05	167.035	8.87776	M-H	ESI-	30	123.045	121.029	167.035	148.973	166.983
Pilocarpine	C07474	HMDB0015217	C11H16N2O2	208.121	209.128	207.114	4.49	M+H	ESI+	50	96.0681	95.0605	209.129	121.076	163.123
Pipecolate	C00408	HMDB0000070	C6H11NO2	129.079	130.086	128.072	11.91	M+H	ESI+	20	84.0804	130.086	56.0492	112.075	130.159
Piperine	C03882	HMDB0029377	C17H19NO3	285.136	286.144	284.129	3.9	M+H	ESI+	20	238.989	220.979	263.026	262.005	202.968
P-Octopamine	C04227	HMDB0004825	C8H11NO2	153.079	154.086	152.072	14.51	M+H	ESI+	20	136.075	119.049	91.0537	137.059	118.065
Pregnenolone Sulfate	C18044	HMDB0000774	C21H32O5S	396.197	397.204	395.19	3.56	M+H	ESI+	20	281.226	299.237	379.193	255.211	159.117
Prephenate	C00254	HMDB0012283	C10H10O6	226.048	227.055	225.04	11.7959	M-H	ESI-	20	225.039	137.06	224.904	225.159	174.407
Pseudouridine	C02067	HMDB0000767	C9H12N2O6	244.07	245.077	243.062	10.93	M+H	ESI+	20	209.056	191.045	125.034	155.045	179.045
Psicose	C06468	-	C6H12O6	180.063	181.071	179.056	11.17	M-H	ESI-	20	71.0133	59.0133	89.0237	178.983	113.024
Puerarin	C10524	HMDB0240265	C21H20O9	416.111	417.118	415.103	9.11	M-H	ESI-	50	414.826	370.868	178.193	65.8182	68.1435
Purine	C15587	HMDB0001366	C5H4N4	120.044	121.051	119.036	8.3	M+H	ESI+	50	94.0396	121.05	67.0288	52.018	67.0351
Pyridoxal	C00250	HMDB0001545	C8H9NO3	167.058	168.066	166.051	8	M+H	ESI+	50	94.0648	67.0539	122.06	150.055	58.0649
Pyridoxal-Phosphate	C00018	HMDB0001491	C8H10NO6P	247.025	248.032	246.017	15.12	M+H	ESI+	30	150.055	122.06	150.074	94.0649	248.033
Pyridoxamine	C00534	HMDB0001431	C8H12N2O2	168.09	169.097	167.083	13.17	M+H	ESI+	20	152.07	169.097	134.06	151.086	124.075
Pyridoxine	C00314	HMDB0000239	C8H11NO3	169.074	170.081	168.067	8.24	M+H	ESI+	20	152.07	170.081	134.06	124.075	170.096
Pyrogallol	C01108	HMDB0013674	C6H6O3	126.032	127.039	125.024	3.75	M+H	ESI+	30	69.0332	127.086	60.0442	86.0598	58.065
Pyrrole-2-Carboxylate	C05942	HMDB0004230	C5H5NO2	111.032	112.039	110.025	7.83	M-H	ESI-	20	66.0344	110.024	66.0387	66.0404	110.034
Quercetin	C00389	HMDB0005794	C15H10O7	302.043	303.05	301.035	6.58	M-H	ESI-	20	301.217	301.144	178.171	301.004	59.3426
Quinate	C00296	HMDB0003072	C7H12O6	192.063	193.071	191.056	10.33	M-H	ESI-	30	191.056	85.0291	93.0341	127.04	87.0083
Quinolinate	C03722	HMDB0000232	C7H5NO4	167.022	168.029	166.015	11.74	M-H	ESI-	30	122.024	94.0294	78.0344	79.9569	166.054
Raffinose	C00492	HMDB0003213	C18H32O16	504.169	505.176	503.162	13.47	M-H	ESI-	30	179.056	89.0243	221.067	503.162	101.024
Resorcinol Monoacetate	C12064	HMDB0257165	C8H8O3	152.047	153.055	151.04	4.29	M-H	ESI-	30	109.029	59.0135	65.0393	151.04	107.05
Resveratrol	C03582	HMDB0003747	C14H12O3	228.079	229.086	227.071	6.52	M-H	ESI-	30	227.201	119.016	226.95	85.029	178.169
Rhein	C10401	HMDB0032876	C15H8O6	284.032	285.039	283.025	4.04	M-H	ESI-	30	239.035	257.045	243.029	283.024	183.045
Ribitol	C00474	HMDB0000508	C5H12O5	152.068	153.076	151.061	11.66	M-H	ESI-	20	101.024	71.0133	89.0238	151.061	59.0134
Riboflavin (B2)	C00255	HMDB0000244	C17H20N4O6	376.138	377.146	375.131	8.12	M+H	ESI+	30	243.088	377.146	359.135	99.044	69.0335
Ribose 1,5-Bisphosphate	C01182	-	C5H12O11P2	309.985	310.993	308.978	3.56	M+H	ESI+	20	311.293	310.31	310.25	311.257	178.192
Ribose 5-phosphate	C00117	HMDB0001548	C5H11O8P	230.019	231.026	229.012	11.94	M-H	ESI-	20	96.969	78.9584	138.979	210.904	229.011
Ribothymidine	CSID393058	HMDB0000884	C10H14N2O6	258.085	259.092	257.078	8.12	M-H	ESI-	20	125.035	257.077	167.045	124.04	214.071
Rotenone	C07593	HMDB0034436	C23H22O6	394.142	395.149	393.134	3.77	M+H	ESI+	30	213.092	192.079	395.15	203.071	167.071
Rutin	C05625	HMDB0003249	C27H30O16	610.153	611.161	609.146	10.47	M-H	ESI-	30	609.148	301.036	300.028	610.152	302.039
S-(2-Aminoethyl)-L-Cysteine	CSID18889	HMDB0033518	C5H12N2O2S	164.062	165.069	163.055	15.2731	M+H	ESI+	20	120.011	148.042	88.0389	165.021	165.069
Saccharate	C00818	HMDB0029881	C6H10O8	210.038	211.045	209.03	11.82	M-H	ESI-	20	85.0289	209.03	191.019	133.013	129.019
S-Adenosylhomocysteine	C00021	HMDB0000939	C14H20N6O5S	384.122	385.129	383.114	11.85	M+H	ESI+	20	136.062	134.027	250.075	385.13	88.0215
S-Adenosylmethionine	C00019	HMDB0001185	C15H23N6O5S	399.145	400.152	398.138	14.0416	M+H	ESI+	20	251.095	250.093	299.098	136.061	102.054
Salicin	C01451	HMDB0003546	C13H18O7	286.105	287.113	285.098	8.5	M-H	ESI-	20	123.044	121.029	124.048	93.0339	57.5549
Salicylamide	D01811	HMDB0015687	C7H7NO2	137.048	138.055	136.04	4.92	M-H	ESI-	20	109.04	136.051	58.0294	77.014	135.971
Salicylate	C00805	HMDB0001895	C7H6O3	138.032	139.039	137.024	4.4	M-H	ESI-	20	93.034	137.024	94.9801	76.9696	119.017
Sarcosine	C00213	HMDB0000271	C3H7NO2	89.0477	90.055	88.0404	12.68	M+H	ESI+	50	72.0804	56.0494	70.065	57.0571	79.3745
S-Carboxymethyl-L-cysteine	C03727	-	C5H9NO4S	179.025	180.033	178.018	11.3	M+H	ESI+	20	89.0052	163.005	134.027	61.0104	135.011
Sclareol	C09183	HMDB0036827	C20H36O2	308.272	309.279	307.264	3.93	M-H	ESI-	20	85.0288	187.061	221.03	307.084	119.016
Scoparone	C09311	HMDB0030818	C11H10O4	206.058	207.065	205.051	4.12	M+H	ESI+	20	165.114	207.124	166.098	148.087	124.087
Scopoletin	C01752	HMDB0034344	C10H8O4	192.042	193.05	191.035	4.58	M+H	ESI+	20	193.108	176.082	51.3896	51.4502	51.4795
Scyllo-Inositol	C06153	HMDB0006088	C6H12O6	180.063	181.071	179.056	13.8	M-H	ESI-	50	154.947	178.983	76.9695	138.952	160.973
Sebacate	C08277	HMDB0000792	C10H18O4	202.121	203.128	201.113	4.71	M-H	ESI-	30	139.112	183.102	201.113	57.0341	111.081
Secoisolariciresinol diglucoside	CSID8093627	HMDB0036323	C32H46O16	686.279	687.286	685.271	9.92	M-H	ESI-	30	523.221	685.274	361.167	524.224	101.024
Selenomethionine	C05335	HMDB0003966	C5H11NO2Se	196.996	198.003	195.988	10.74	M+H	ESI+	20	180.976	56.0493	151.997	108.955	102.055
Sesamol	C10832	HMDB0033812	C7H6O3	138.032	139.039	137.024	4.88	M-H	ESI-	30	122.032	94.9801	76.9695	93.034	94.0373
S-Hexyl-Glutathione	C02886	-	C16H29N3O6S	391.178	392.185	390.17	4.92	M-H	ESI-	30	143.046	128.035	210.088	254.078	179.046
Shikimate	C00493	HMDB0003070	C7H10O5	174.053	175.06	173.046	11.25	M-H	ESI-	20	154.947	93.0338	73.0289	111.044	137.024
Sinapate	C00482	HMDB0032616	C11H12O5	224.068	225.076	223.061	4.59074	M-H	ESI-	20	164.047	223.06	149.024	208.037	147.044
Sinigrin	C08427	HMDB0034070	C10H17NO9S2	359.034	360.042	358.027	9.75	M-H	ESI-	30	96.9598	74.9908	95.9521	358.027	79.9572
Sorbate	CSID558605	HMDB0029581	C6H8O2	112.052	113.06	111.045	4.89	M-H	ESI-	20	111.044	67.0547	58.0293	83.0496	111.019
Sorbitol	C00749	HMDB0000247	C6H14O6	182.079	183.086	181.072	12.17	M-H	ESI-	30	59.0134	71.0133	101.024	89.0238	73.0289
Sorbose	C00247	HMDB0001266	C6H12O6	180.063	181.071	179.056	12.16	M-H	ESI-	20	71.0133	59.0134	89.0238	178.983	113.024
Spermine	C00750	HMDB0001256	C10H26N4	202.216	203.223	201.208	7.97	M+H	ESI+	30	203.183	102.091	103.094	62.0597	63.0633
Sphingosine	C00319	HMDB0000252	C18H37NO2	299.282	300.29	298.275	4.36	M+H	ESI+	30	234.939	252.949	300.216	199.096	181.085
Stachydrine	C10172	HMDB0004827	C7H13NO2	143.095	144.102	142.087	11.28	M+H	ESI+	50	58.0649	84.0805	144.102	102.055	72.0805
Stachyose	C01613	HMDB0003553	C24H42O21	666.222	667.229	665.215	13.93	M-H	ESI-	30	383.12	179.056	665.215	341.109	485.152
Suberate	C08278	HMDB0000893	C8H14O4	174.089	175.097	173.082	10.14	M-H	ESI-	30	111.081	154.947	83.0496	173.081	129.091
Suberylglycine	CSID4956295	HMDB0000953	C10H17NO5	231.111	232.118	230.103	9.85	M-H	ESI-	30	74.0243	111.081	230.103	168.103	212.092
Succinate	C00042	HMDB0000254	C4H6O4	118.027	119.034	117.019	11.53	M-H	ESI-	20	73.029	117.019	99.0082	73.034	73.0361
Succinate anhydride	C19524	HMDB0032523	C4H4O3	100.016	101.023	99.0087	11.4	M+H	ESI+	20	59.06	101.071	60.0442	101.107	59.0636
Succinylacetone	CSID5121	HMDB0000635	C7H10O4	158.058	159.065	157.051	5.06	M+H	ESI+	20	99.0436	141.054	113.059	85.0644	141.074
Sucrose	C00089	HMDB0000258	C12H22O11	342.116	343.124	341.109	12.9	M-H	ESI-	30	89.0243	71.0137	101.024	113.024	119.035
Sulforaphane	CSID5157	HMDB0005792	C6H11NOS2	177.028	178.036	176.021	4.4	M-H	ESI-	20	176.928	157.943	176.082	134.035	176.046
Synephrine	C01869	HMDB0062811	C9H13NO2	167.095	168.102	166.087	16.0988	M+H	ESI+	20	150.091	119.049	135.067	91.0537	121.064
Tagatose	C00795	HMDB0003418	C6H12O6	180.063	181.071	179.056	11.8	M-H	ESI-	20	71.0133	59.0134	89.0238	178.983	113.024
Tangeretin	C10190	HMDB0030539	C20H20O7	372.121	373.128	371.114	3.91	M+H	ESI+	30	373.127	343.08	358.104	325.07	312.098
Tartrate	C02107	HMDB0029878	C4H6O6	150.016	151.024	149.009	11.84	M-H	ESI-	30	72.9926	87.0082	59.0134	149.009	103.003
Taurine	C00245	HMDB0000251	C2H7NO3S	125.015	126.022	124.007	12.5601	M+H	ESI+	20	126.021	108.011	108.995	55.1108	55.7361
Terpinolene	C06075	HMDB0036994	C10H16	136.125	137.133	135.118	3.59	M-H	ESI-	50	76.9694	65.0141	134.972	94.98	75.9616
Tetrahydrocortisol	C05472	HMDB0000949	C21H34O5	366.241	367.248	365.233	4.58	M-H	ESI-	30	335.223	333.208	301.181	319.192	305.212
Tetramethylpyrazine	CSID13658	HMDB0036584	C8H12N2	136.1	137.107	135.093	6.44	M+H	ESI+	50	137.107	81.0569	55.054	96.0803	80.0492
Theaflavin	CSID102754	HMDB0005788	C29H24O12	564.127	565.134	563.119	9.78	M-H	ESI-	20	563.122	564.125	425.089	545.112	565.127
Theobromine	C07480	HMDB0002825	C7H8N4O2	180.065	181.072	179.057	5.41	M+H	ESI+	50	67.0288	69.0444	110.071	138.066	108.055
Theophylline	C07130	HMDB0001889	C7H8N4O2	180.065	181.072	179.057	5.21	M-H	ESI-	50	164.033	122.035	94.0405	135.007	79.017
Thiamine Pyrophosphate	C00068	HMDB0001372	C12H18N4O7P2S	425.045	426.052	424.038	12.82	M+H	ESI+	20	122.071	303.981	425.045	345.079	224.014
Thiopurine S-Methylether	C16614	HMDB0060412	C6H6N4S	166.031	167.039	165.024	5.36	M+H	ESI+	50	152.015	119.035	126.012	125.004	167.039
Threitol	C16884	HMDB0004136	C4H10O4	122.058	123.065	121.051	10.92	M-H	ESI-	20	59.0134	71.0133	121.013	121.029	121.05
Threonate	C21649	-	C4H8O5	136.037	137.044	135.03	10.21	M-H	ESI-	20	75.0081	135.029	89.0237	72.9925	59.0133
Threonine	C00188	HMDB0000167	C4H9NO3	119.058	120.066	118.051	12.47	M+H	ESI+	20	74.0597	56.0492	102.055	120.065	84.044
Thymidine	C00214	HMDB0000273	C10H14N2O5	242.09	243.098	241.083	6.61	M-H	ESI-	20	125.035	241.083	151.051	241.217	84.9899
Thymine	C00178	HMDB0000262	C5H6N2O2	126.043	127.05	125.036	6.33	M-H	ESI-	30	125.035	65.998	81.0454	125.047	51.6124
Thyrotropin Releasing Hormone	C03958	HMDB0060080	C16H22N6O4	362.17	363.178	361.163	9.9	M+H	ESI+	30	115.087	249.099	221.104	70.0651	363.178
Tiglylglycine	CSID4945715	HMDB0000959	C7H11NO3	157.074	158.081	156.067	5.05	M+H	ESI+	30	55.0541	83.0489	53.0384	158.096	55.0572
trans-4-Hydroxycinnamic acid	C12621	HMDB0001713	C9H8O3	164.047	165.055	163.04	6.61	M+H	ESI+	30	165.021	69.0332	83.0601	124.086	59.0602
Trans-4-Hydroxy-L-Proline	C01157	HMDB0006055	C5H9NO3	131.058	132.066	130.051	12.75	M+H	ESI+	30	86.0597	68.0492	132.065	58.0649	114.055
trans-Aconitate	C02341	HMDB0000958	C6H6O6	174.016	175.024	173.009	12.43	M-H	ESI-	50	154.947	76.9695	172.958	94.9801	136.937
Trehalose	C01083	HMDB0000975	C12H22O11	342.116	343.124	341.109	13.23	M-H	ESI-	30	89.024	101.024	71.0135	119.035	113.024
Trehalose-6-Phosphate	C00689	HMDB0001124	C12H23O14P	422.083	423.09	421.075	12.54	M+H	ESI+	20	127.039	98.984	225.016	243.027	207.005
Trifolirhizin	C10538	HMDB0036630	C22H22O10	446.121	447.129	445.114	7.19292	M+H	ESI+	20	285.074	123.043	151.038	175.038	147.043
Trigonelline	C01004	HMDB0000875	C7H7NO2	137.048	138.055	136.04	11.65	M-H	ESI-	20	92.0498	136.04	66.0343	80.0499	52.0188
Trimethylacetic Acid	CSID6177	HMDB0041992	C5H10O2	102.068	103.075	101.061	4.88	M-H	ESI-	20	101.06	75.9615	101.006	57.0341	59.9668
Trimethylamine N-Oxide	C01104	HMDB0000925	C3H9NO	75.0684	76.0757	74.0611	12.8	M+H	ESI+	20	59.0726	58.0649	76.0753	59.0762	58.0683
Tropate	C01456	HMDB0062590	C9H10O3	166.063	167.07	165.056	5.03	M-H	ESI-	20	149.009	135.044	82.0405	165.04	164.938
Tryptamine	C00398	HMDB0000303	C10H12N2	160.1	161.107	159.093	14.47	M-H	ESI-	30	78.9586	158.925	159.092	51.5913	51.7244
Tyramine	C00483	HMDB0000306	C8H11NO	137.084	138.091	136.077	15.53	M-H	ESI-	20	136.076	106.042	108.021	50.1652	51.3387
Tyrosine	C00082	HMDB0000158	C9H11NO3	181.074	182.081	180.067	11.81	M+H	ESI+	30	136.075	123.044	119.049	91.0538	147.044
Tyrosol	C06044	HMDB0004284	C8H10O2	138.068	139.075	137.061	4.86	M-H	ESI-	50	119.05	93.0339	106.042	107.05	76.9694
UDP	C00015	HMDB0000295	C9H14N2O12P2	404.002	405.009	402.995	12.37	M-H	ESI-	30	158.925	111.02	402.994	78.9589	384.984
UDP-Galactose	C00052	HMDB0000302	C15H24N2O17P2	566.055	567.062	565.048	11.54	M-H	ESI-	30	323.027	565.047	384.983	320.977	78.9586
UDP-Glucuronate	C00167	HMDB0000935	C15H22N2O18P2	580.034	581.042	579.027	12.64	M-H	ESI-	30	402.994	323.028	254.991	384.983	579.025
UDP-N-Acetylgalactosamine	C00203	HMDB0000304	C17H27N3O17P2	607.082	608.089	606.074	10.96	M-H	ESI-	30	384.983	606.073	402.994	282.038	362.003
UDP-N-acetylglucosamine	C00043	HMDB0000290	C17H27N3O17P2	607.082	608.089	606.074	10.89	M-H	ESI-	30	384.983	606.073	282.038	362.003	402.994
Umbelliferone	C09315	HMDB0029865	C9H6O3	162.032	163.039	161.024	4.62	M-H	ESI-	20	160.972	161.083	134.035	161.046	160.956
UMP	C00105	HMDB0000288	C9H13N2O9P	324.036	325.043	323.029	11.32	M-H	ESI-	30	78.9585	96.969	323.027	211.001	111.019
Uracil	C00106	HMDB0000300	C4H4N2O2	112.027	113.035	111.02	7.57	M-H	ESI-	30	111.019	68.0136	67.0297	58.0295	51.3134
Uracil 5-Carboxylate	C03030	-	C5H4N2O4	156.017	157.024	155.01	10.57	M+H	ESI+	30	157.024	68.9968	139.014	114.018	74.9372
Urate	C00366	HMDB0000289	C5H4N4O3	168.028	169.036	167.021	10.24	M-H	ESI-	50	138.952	69.0089	124.015	96.0198	120.941
Ureidopropionate	C02642	HMDB0000026	C4H8N2O3	132.053	133.061	131.046	10.33	M+H	ESI+	20	115.05	90.0545	73.0392	72.044	133.06
Uridine	C00299	HMDB0000296	C9H12N2O6	244.07	245.077	243.062	9.39	M-H	ESI-	20	110.024	200.056	111.019	243.061	152.035
Urocanate	C00785	HMDB0000301	C6H6N2O2	138.043	139.05	137.036	10.31	M+H	ESI+	30	121.039	93.0445	139.05	95.0601	68.0493
UTP	C00075	HMDB0000285	C9H15N2O15P3	483.969	484.976	482.961	12.86	M-H	ESI-	30	158.925	384.983	402.994	482.961	176.936
Valerate	C00803	HMDB0000892	C5H10O2	102.068	103.075	101.061	4.88	M-H	ESI-	20	101.06	75.9615	57.0341	59.9667	101.006
Vanillate	C06672	HMDB0000484	C8H8O4	168.042	169.05	167.035	7.53	M-H	ESI-	20	123.044	167.034	152.011	108.021	91.0182
Vanillin	C00755	HMDB0012308	C8H8O3	152.047	153.055	151.04	4.62427	M-H	ESI-	20	136.016	151.04	150.938	52.5941	53.8694
Xanthine	C00385	HMDB0000292	C5H4N4O2	152.033	153.041	151.026	9.81	M-H	ESI-	50	108.02	65.9981	150.937	126.03	151.026
Xanthosine	C01762	HMDB0000299	C10H12N4O6	284.076	285.083	283.068	10.04	M-H	ESI-	20	151.025	283.067	283.263	85.0288	196.993
Xanthosine-Monophosphate	C00655	HMDB0001554	C10H13N4O9P	364.042	365.049	363.035	12.82	M-H	ESI-	30	211.001	151.026	96.9693	78.9587	363.034
Xanthurenate	C02470	HMDB0000881	C10H7NO4	205.038	206.045	204.03	8.78	M+H	ESI+	30	178.05	206.045	132.044	178.065	53.0075
Xylitol	C00379	HMDB0002917	C5H12O5	152.068	153.076	151.061	11.58	M-H	ESI-	30	59.0135	71.0135	89.024	101.024	73.0291

## Sheet: Table S3
Table S3 List of the identified metabolites in the Hs578T cells treated with doxorubicin and controls analysed with LC-MS
Metabolite	Formula	RT [min]	m/z	Monoisotopic mass (Da)	Mass error (ppm)	Reference Ion	Method of identification	Level of identification (MSI recommended guidelines)*	Group peak area: Control 3 d	Group peak area: Dox 3 d	Fold change: Dox 3 d/Control 3 d	Log2 Fold Change: Dox 3 d/Control 3 d	P-value: (Dox 3 d) / (Control 3 d)	Adjusted p-value: (Dox 3 d) / (Control 3 d)	VIP score (PLS-DA): (Dox 3 d) vs (Control 3 d)
1,2,3-Propanetricarboxylate	C6 H8 O6	12.194	175.025	176.032	2.12	[M-H]-1	RT, m/z	L1	333390	58991.4	0.177	-2.5	0.741713	1	0.0500694
1,3,7-Trimethylurate	C8 H10 N4 O3	3.648	209.068	210.075	-0.71	[M-H]-1	RT, m/z	L1	1.23979e+06	2.62387e+06	2.116	1.08	0.00272087	0.0197468	0.173809
1-Aminocyclopropanecarboxylate	C4 H7 N O2	11.764	100.041	101.048	2.27	[M-H]-1	RT, m/z	L1	1.31804e+07	3.26043e+07	2.474	1.31	0.000139081	0.00242746	0.621581
1-Methyladenosine	C11 H15 N5 O4	12.804	282.121	281.113	3.51	[M+H]+1	RT, m/z	L1	1.92195e+06	6.85356e+06	3.566	1.83	0.00466966	0.0289277	0.278044
1-Methyl-L-Histidine	C7 H11 N3 O2	12.569	170.093	169.086	2.41	[M+H]+1	RT, m/z, MS/MS	L1	2.01808e+07	5.43926e+07	2.695	1.43	0.00111285	0.0108994	0.83516
1-Phenyl-1,2-propanedione	C9 H8 O2	3.89	149.06	148.053	2.05	[M+H]+1	RT, m/z	L1	6.44863e+07	1.3453e+08	2.086	1.06	0.0010044	0.0101518	1.19803
2,4-Dihydroxybutanoate	C4 H8 O4	12.699	101.025	120.043	2.84	[M-H-H2O]-1	m/z, MS/MS	L2	1.72314e+07	2.90087e+07	1.683	0.75	0.109551	0.271837	0.447334
2,6-Dihydroxypyridine	C5 H5 N O2	6.806	110.025	111.032	3.39	[M-H]-1	RT, m/z	L1	2.88636e+07	6.22543e+07	2.157	1.11	0.00124168	0.01158	0.744169
2-Amino-1,3,4-octadecanetriol	C18 H39 N O3	4.724	318.301	317.294	2.12	[M+H]+1	m/z, MS/MS	L2	4.27528e+07	4.86409e+08	11.377	3.51	3.73409e-06	0.000290286	3.07788
2-Aminooctanoate	C8 H17 N O2	13.84	160.134	159.126	2.37	[M+H]+1	m/z, MS/MS	L2	4.47197e+06	8.33759e+06	1.864	0.9	0.000757669	0.00824045	0.26975
2-Deoxy-D-Glucose	C6 H12 O5	12.267	165.076	164.069	3.14	[M+H]+1	RT, m/z	L1	2.66826e+06	1.90064e+07	7.123	2.83	0.00204918	0.0162128	0.502108
2-Hydroxyadipate	C6 H10 O5	11.649	161.046	162.053	3.26	[M-H]-1	RT, m/z	L1	11465	542247	47.296	5.56	0.0761029	0.208245	0.0972661
2-Hydroxyglutarate	C5 H8 O5	11.622	147.031	148.038	4.36	[M-H]-1	RT, m/z	L1	23818.8	1.57142e+07	659.74	9.37	0.108569	0.270415	0.450267
2-Hydroxyisocaproate	C6 H12 O3	4.873	131.072	132.079	3.41	[M-H]-1	RT, m/z, MS/MS	L1	351434	3.55901e+06	10.127	3.34	0.00544309	0.0324819	0.219687
2-Hydroxypyridine	C5 H5 N O	13.563	96.0447	95.0374	2.98	[M+H]+1	m/z, MS/MS	L2	4.49111e+06	9.95832e+06	2.217	1.15	8.44256e-06	0.000453601	0.32305
2-Methyl-3-hydroxybutyrate	C5 H10 O3	4.875	117.056	118.063	1.96	[M-H]-1	RT, m/z	L1	898217	5.22805e+06	5.82	2.54	0.0240469	0.0925674	0.303635
2-Methylbenzoate	C8 H8 O2	4.853	117.035	136.053	1.11	[M-H-H2O]-1	RT, m/z	L1	2.22973e+06	6.33431e+06	2.841	1.51	7.46011e-05	0.00170713	0.282045
2-Methylbutyrylglycine	C7 H13 N O3	6.853	160.097	159.09	1.45	[M+H]+1	RT, m/z	L1	1.03768e+06	1.6842e+06	1.623	0.7	0.342546	0.628192	0.112687
2-Octenedioate	C8 H12 O4	4.232	173.081	172.074	1.32	[M+H]+1	RT, m/z	L1	3.94428e+06	9.12641e+06	2.314	1.21	0.416833	0.718578	0.301964
2-Oxoglutarate	C5 H6 O5	11.687	145.015	146.022	4.4	[M-H]-1	RT, m/z, MS/MS	L1	81700.7	3.38444e+07	414.249	8.69	0.367891	0.660356	0.580732
2-Phosphoglycerate	C3 H7 O7 P	12.877	187.001	185.994	4.73	[M+H]+1	RT, m/z	L1	1.83436e+06	4.23238e+06	2.307	1.21	0.732666	1	0.178116
3-(4-hydroxyphenyl)propanoate	C9 H10 O3	4.741	165.056	166.063	2.79	[M-H]-1	RT, m/z	L1	191174	2.43227e+06	12.723	3.67	0.00123346	0.0115312	0.183677
3-Hydroxybenzaldehyde	C7 H6 O2	3.882	105.034	122.037	1.28	[M+H-H2O]+1	RT, m/z, MS/MS	L1	8.9941e+06	2.08267e+07	2.316	1.21	0.00135703	0.0123573	0.47606
3-Hydroxybutyrate	C4 H8 O3	6.818	103.04	104.048	3.41	[M-H]-1	RT, m/z, MS/MS	L1	6.99616e+06	1.6285e+07	2.328	1.22	0.939342	1	0.422204
3-Methylcrotonylglycine	C7 H11 N O3	6.863	190.108	157.075	4.26	[M+H+MeOH]+1	RT, m/z	L1	1.65096e+06	5.02747e+06	3.045	1.61	0.438258	0.746082	0.250356
3-Methylglutaconate	C6 H8 O4	13.338	145.05	144.043	3.09	[M+H]+1	m/z, MS/MS	L2	1.18908e+06	524810	0.441	-1.18	0.00823717	0.0428044	0.110421
3-Methylglutarate	C6 H10 O4	12.266	147.066	146.058	3	[M+H]+1	RT, m/z	L1	955698	1.29162e+07	13.515	3.76	0.00153978	0.0136622	0.458524
3-Methylhistamine	C6 H11 N3	6.781	126.103	125.096	2.11	[M+H]+1	m/z, MS/MS	L2	1.85189e+07	3.31316e+07	1.789	0.84	0.686971	1	0.431008
3-Methylxanthine	C6 H6 N4 O2	3.695	147.032	166.05	2.88	[M-H-H2O]-1	m/z, MS/MS	L2	1.00315e+07	1.93618e+07	1.93	0.95	0.0221265	0.0869962	0.448752
4-Aminobutyrate	C4 H9 N O2	12.911	104.071	103.063	1.41	[M+H]+1	RT, m/z, MS/MS	L1	7.69487e+06	2.16657e+07	2.816	1.49	0.000246827	0.00359464	0.529757
4-Guanidinobutanoate	C5 H11 N3 O2	13.677	146.093	145.086	2.65	[M+H]+1	RT, m/z, MS/MS	L1	9.33575e+06	2.76666e+07	2.964	1.57	0.00237603	0.0179177	0.538745
4-Hydroxy-L-Phenylglycine	C8 H9 N O3	8.135	168.066	167.059	2.27	[M+H]+1	m/z, MS/MS	L2	2.67556e+07	1.42384e+08	5.322	2.41	0.001372	0.0124349	1.37666
4-Hydroxyphenylacetate	C8 H8 O3	4.673	151.04	152.048	1.99	[M-H]-1	m/z, MS/MS	L2	379993	229388	0.604	-0.73	0.838725	1	0.0501894
5-Hydroxyindoleacetate	C10 H9 N O3	10.286	190.052	191.059	3.33	[M-H]-1	RT, m/z	L1	462458	2.97333e+06	6.429	2.68	0.00302742	0.0214475	0.214084
5-Hydroxypipecolate	C6 H11 N O3	9.754	146.082	145.074	2.29	[M+H]+1	RT, m/z, MS/MS	L1	1.54875e+07	3.72371e+07	2.404	1.27	6.48707e-05	0.00162989	0.676879
5-Methylcytidine	C10 H15 N3 O5	9.446	258.109	257.102	2.52	[M+H]+1	RT, m/z	L1	386527	1.53083e+06	3.96	1.99	0.0811144	0.219316	0.144251
5-Methylcytosine	C5 H7 N3 O	3.831	124.052	125.059	3.23	[M-H]-1	m/z, MS/MS	L2	7.35532e+07	1.4118e+08	1.919	0.94	0.00318965	0.0221099	1.16656
5-Oxoproline	C5 H7 N O3	9.039	128.036	129.043	3.17	[M-H]-1	RT, m/z, MS/MS	L1	9.71335e+08	2.10018e+09	2.162	1.11	0.00216562	0.0167703	4.85393
5-Valerolactone	C5 H8 O2	13.818	101.06	100.053	1.48	[M+H]+1	m/z, MS/MS	L2	1.89228e+06	2.64858e+06	1.4	0.49	0.840817	1	0.072336
6-Methylnicotinamide	C7 H8 N2 O	21.119	137.071	136.064	2.15	[M+H]+1	m/z, MS/MS	L2	1.18719e+08	7.81219e+08	6.58	2.72	0.00112353	0.0108994	3.55474
6-Phosphogluconate	C6 H13 O10 P	12.858	259.022	276.026	3.68	[M+H-H2O]+1	RT, m/z	L1	1.59768e+06	2.40646e+06	1.506	0.59	0.76074	1	0.104131
7-Isopropyl-1,4-Dimethylazulene	C15 H18	3.968	199.149	198.141	2.85	[M+H]+1	RT, m/z	L1	4.34525e+06	8.84333e+06	2.035	1.03	1.04169e-05	0.000515637	0.301059
Acetoacetate	C4 H6 O3	12.266	101.025	102.032	3.18	[M-H]-1	m/z, MS/MS	L2	1.72314e+07	5.41843e+07	3.145	1.65	0.000647059	0.00745342	0.767873
Adenine	C5 H5 N5	9.038	136.062	135.055	2.87	[M+H]+1	RT, m/z, MS/MS	L1	3.81774e+06	1.71586e+07	4.494	2.17	0.00904889	0.0456106	0.463345
ADP	C10 H15 N5 O10 P2	11.85	428.038	427.031	3.15	[M+H]+1	RT, m/z, MS/MS	L1	989821	5.01766e+07	50.693	5.66	0.0284051	0.104849	0.736673
Allantoin	C4 H6 N4 O3	12.237	159.052	158.044	2.59	[M+H]+1	RT, m/z	L1	1.20576e+06	1.42121e+06	1.179	0.24	0.99995	1	0.0413637
Aminoadipate	C6 H11 N O4	11.03	162.077	161.069	4.19	[M+H]+1	RT, m/z, MS/MS	L1	5.22278e+06	8.50406e+06	1.628	0.7	0.292442	0.561192	0.209501
Argininosuccinate	C10 H18 N4 O6	12.88	291.131	290.124	3.1	[M+H]+1	RT, m/z	L1	2.31538e+06	6.9381e+06	2.997	1.58	0.255978	0.507617	0.203687
Asparagine	C4 H8 N2 O3	11.264	115.05	132.054	1.92	[M+H-H2O]+1	RT, m/z	L1	1.08529e+06	2.76761e+06	2.55	1.35	0.000512259	0.00627883	0.195482
Aspartate	C4 H7 N O4	12.308	134.045	133.038	3.65	[M+H]+1	RT, m/z	L1	8.12333e+06	2.70232e+06	0.333	-1.59	0.655171	0.98582	0.249875
cADP-ribose	C15 H21 N5 O13 P2	11.898	540.057	541.064	4.79	[M-H]-1	m/z, MS/MS	L2	4.67061e+06	2.77689e+06	0.595	-0.75	0.970009	1	0.125034
Carnosic Acid	C20 H28 O4	3.757	313.182	332.2	3.55	[M-H-H2O]-1	RT, m/z	L1	1.84416e+06	3.42681e+06	1.858	0.89	1.08438e-05	0.000524012	0.181228
Carnosine	C9 H14 N4 O3	13.92	227.114	226.107	2.67	[M+H]+1	RT, m/z, MS/MS	L1	2.58941e+06	5.4054e+06	2.088	1.06	0.207491	0.435393	0.247067
Choline	C5 H13 N O	21.13	104.107	103.1	2	[M+H]+1	m/z, MS/MS	L2	2.92039e+07	1.32668e+08	4.543	2.18	0.00308886	0.0216445	1.39356
Cinnamyl Alcohol	C9 H10 O	3.953	135.081	134.073	1.78	[M+H]+1	RT, m/z	L1	1.34957e+07	2.44887e+07	1.815	0.86	0.0109935	0.0524026	0.488129
Citraconate	C5 H6 O4	11.793	129.02	130.027	4.96	[M-H]-1	m/z, MS/MS	L2	782661	2.25788e+07	28.849	4.85	0.0333437	0.117571	0.51776
Citrate	C6 H8 O7	13.135	191.02	192.028	3.52	[M-H]-1	RT, m/z, MS/MS	L1	5.96274e+06	2.03812e+07	3.418	1.77	0.519947	0.84102	0.561231
Creatine	C4 H9 N3 O2	13.173	132.077	131.07	3.58	[M+H]+1	RT, m/z, MS/MS	L1	4.67535e+09	1.23572e+10	2.643	1.4	0.00236498	0.0178728	11.5614
Creatinine	C4 H7 N3 O	9.927	114.067	113.059	3.42	[M+H]+1	RT, m/z, MS/MS	L1	6.21379e+08	1.55949e+09	2.51	1.33	0.00358596	0.0242491	4.14672
Crotonic acid	C4 H6 O2	12.732	85.0298	86.0371	3.5	[M-H]-1	m/z, MS/MS	L2	1.39907e+07	2.37187e+07	1.695	0.76	0.00154633	0.0136622	0.434865
CTP	C9 H16 N3 O14 P3	13.452	483.992	482.985	1.33	[M+H]+1	RT, m/z	L1	1.01098e+07	3.10769e+07	3.074	1.62	0.0253967	0.096134	0.671967
Cys-Gly	C5 H10 N2 O3 S	11.332	179.049	178.042	1.75	[M+H]+1	RT, m/z	L1	91090.1	188214	2.066	1.05	0.500678	0.818078	0.445417
Cysteine-S-Sulfate	C3 H7 N O5 S2	12.627	201.984	200.977	1.66	[M+H]+1	RT, m/z	L1	139684	351751	2.518	1.33	0.0572978	0.172969	0.0641463
Cystine	C6 H12 N2 O4 S2	13.062	241.031	240.024	1.46	[M+H]+1	RT, m/z	L1	312579	941441	3.012	1.59	0.00188572	0.015401	0.109859
Cytidine	C9 H13 N3 O5	11.27	244.093	243.086	1.82	[M+H]+1	RT, m/z, MS/MS	L1	759674	2.4254e+06	3.193	1.67	0.0394074	0.13174	0.179957
Cytosine	C4 H5 N3 O	10.61	110.036	111.044	2.81	[M-H]-1	RT, m/z, MS/MS	L1	5.35434e+07	1.05335e+08	1.967	0.98	0.00451967	0.0283747	1.05935
Deoxycytidine	C9 H13 N3 O4	10.452	228.098	227.091	2.31	[M+H]+1	RT, m/z	L1	847192	1.71006e+07	20.185	4.34	0.000393012	0.00516129	0.497517
Deoxyguanosine	C10 H13 N5 O4	9.046	268.105	267.097	2.61	[M+H]+1	RT, m/z, MS/MS	L1	7.51003e+06	4.93695e+07	6.574	2.72	0.0328706	0.116541	0.846693
dGMP	C10 H14 N5 O7 P	11.752	346.057	347.064	2.75	[M-H]-1	RT, m/z	L1	1.62654e+06	6.36957e+06	3.916	1.97	0.94098	1	0.193155
dGTP	C10 H16 N5 O13 P3	12.882	508.004	506.997	2.54	[M+H]+1	RT, m/z, MS/MS	L1	9.50409e+06	2.64184e+07	2.78	1.47	0.0241971	0.0927755	0.554567
Dihydrouracil	C4 H6 N2 O2	6.5	113.036	114.043	2.71	[M-H]-1	RT, m/z, MS/MS	L1	1.36307e+07	2.47676e+07	1.817	0.86	0.00381356	0.0254303	0.498403
Dihydroxyacetone Phosphate	C3 H7 O6 P	12.283	168.991	169.999	3.22	[M-H]-1	RT, m/z	L1	849878	3.78554e+06	4.454	2.16	0.0597714	0.176264	0.268488
Dipalmitoylphosphatidylcholine	C40 H80 N O8 P	3.83	734.568	733.561	-1.5	[M+H]+1	m/z, MS/MS	L2	2.40307e+07	2.27487e+07	0.947	-0.08	0.660803	0.987997	0.324223
D-Ornithine	C5 H12 N2 O2	17	131.083	132.09	3.56	[M-H]-1	RT, m/z	L1	2.39314e+06	6.89195e+06	2.88	1.53	0.000197238	0.00309568	0.286496
Galactitol	C6 H14 O6	12.238	181.072	182.08	3.65	[M-H]-1	RT, m/z, MS/MS	L1	1.01226e+07	3.05753e+08	30.205	4.92	0.00561867	0.0331708	1.93409
Gingerol	C17 H26 O4	3.736	293.177	294.184	3.59	[M-H]-1	RT, m/z	L1	1.54349e+06	2.25825e+06	1.463	0.55	0.699468	1	0.120289
Gluconate	C6 H12 O7	11.967	195.052	196.059	3.53	[M-H]-1	RT, m/z, MS/MS	L1	5.05049e+06	2.72385e+06	0.539	-0.89	0.904533	1	0.109394
Glucosamine	C6 H13 N O5	12.104	180.087	179.08	1.4	[M+H]+1	RT, m/z	L1	2.88199e+07	3.53235e+07	1.226	0.29	0.991649	1	0.19446
Glucose 6-Phosphate	C6 H13 O9 P	12.612	261.038	260.031	3.86	[M+H]+1	RT, m/z, MS/MS	L1	1.06227e+07	2.46017e+07	2.316	1.21	0.660409	0.987926	0.357967
Glutamate	C5 H9 N O4	12.249	148.061	147.054	2.64	[M+H]+1	RT, m/z, MS/MS	L1	8.54432e+08	1.64518e+08	0.193	-2.38	0.91089	1	1.06596
Glutamine	C5 H10 N2 O3	13.047	145.062	146.069	2.39	[M-H]-1	RT, m/z, MS/MS	L1	8.90091e+07	8.84086e+07	0.993	-0.01	0.999973	1	0.0504733
Glutarate	C5 H8 O4	12.04	131.035	132.043	2.95	[M-H]-1	RT, m/z, MS/MS	L1	2.91278e+06	8.37382e+06	2.875	1.52	0.621792	0.951808	0.249528
Glutathione Reduced	C10 H17 N3 O6 S	11.98	308.092	307.085	2.73	[M+H]+1	RT, m/z, MS/MS	L1	7.31074e+08	4.12241e+07	0.056	-4.15	0.505537	0.823577	1.27808
Glycerate	C3 H6 O4	9.7	87.0092	106.027	3.73	[M-H-H2O]-1	RT, m/z	L1	1.69704e+07	2.87576e+07	1.695	0.76	0.0424178	0.139028	0.547201
Glycerol 3-Phosphate	C3 H9 O6 P	11.55	171.007	172.014	3.61	[M-H]-1	RT, m/z	L1	3.66365e+06	3.99225e+07	10.897	3.45	4.34183e-05	0.00136127	0.863302
Glycerophosphocholine	C8 H20 N O6 P	13.12	258.111	257.103	1.87	[M+H]+1	RT, m/z	L1	2.35923e+08	2.53992e+09	10.766	3.43	4.12824e-06	0.000306522	6.82152
Guanidinoacetate	C3 H7 N3 O2	13.694	118.061	117.054	2.77	[M+H]+1	RT, m/z	L1	2.08332e+06	3.63349e+06	1.744	0.8	0.128292	0.304261	0.176831
Guanidinosuccinate	C5 H9 N3 O4	10.68	176.066	175.059	-0.97	[M+H]+1	RT, m/z	L1	1.70105e+07	2.81365e+07	1.654	0.73	0.00844459	0.043589	0.503364
Guanosine Triphosphate	C10 H16 N5 O14 P3	13.837	523.998	522.991	0.94	[M+H]+1	RT, m/z	L1	1.35217e+06	3.46391e+06	2.562	1.36	0.0346119	0.120502	0.207598
Hexanoate	C6 H12 O2	4.798	115.077	116.084	2.85	[M-H]-1	RT, m/z, MS/MS	L1	2.98361e+06	5.6512e+06	1.894	0.92	0.348382	0.635815	0.17986
Hippurate	C9 H9 N O3	4.863	178.052	179.059	3.09	[M-H]-1	RT, m/z	L1	6.17005e+06	1.25397e+07	2.032	1.02	0.0141714	0.0633556	0.340491
Homocysteine	C4 H9 N O2 S	13.652	134.029	135.036	3.57	[M-H]-1	RT, m/z	L1	514513	2.17293e+06	4.223	2.08	0.0589835	0.175144	0.152165
Hydrocinnamic Acid	C9 H10 O2	3.911	149.061	150.069	3.97	[M-H]-1	RT, m/z	L1	1.31568e+06	1.57197e+06	1.195	0.26	0.943681	1	0.0591438
Hypotaurine	C2 H7 N O2 S	13.257	110.027	109.02	2.62	[M+H]+1	RT, m/z	L1	1.62351e+07	4.33961e+07	2.673	1.42	0.0209857	0.0833597	0.643467
Hypoxanthine	C5 H4 N4 O	9.765	137.046	136.039	2.4	[M+H]+1	RT, m/z, MS/MS	L1	2.59729e+07	1.63143e+07	0.628	-0.67	0.999971	1	0.130506
Indoleacetaldehyde	C10 H9 N O	5.186	160.076	159.069	3.07	[M+H]+1	RT, m/z	L1	5.33651e+07	1.1847e+08	2.22	1.15	0.389139	0.686684	1.14361
Inosine	C10 H12 N4 O5	10.488	267.075	268.081	2.47	[M-H]-1	RT, m/z	L1	323146	3.22441e+06	9.978	3.32	2.86345e-05	0.00109019	0.25492
Lactate	C3 H6 O3	8.703	89.0247	90.032	3.71	[M-H]-1	m/z, MS/MS	L2	2.16434e+09	5.40974e+09	2.499	1.32	0.00231403	0.0175875	8.13696
L-Arginine	C6 H14 N4 O2	20.342	175.119	174.112	2.56	[M+H]+1	RT, m/z, MS/MS	L1	3.27084e+08	6.03303e+08	1.844	0.88	0.00104081	0.0104457	2.53687
L-Carnitine	C7 H15 N O3	12.975	162.113	161.106	2.48	[M+H]+1	RT, m/z, MS/MS	L1	6.48269e+08	1.26989e+09	1.959	0.97	0.879026	1	3.1699
L-Citrulline	C6 H13 N3 O3	13.564	176.103	175.096	2.33	[M+H]+1	RT, m/z, MS/MS	L1	2.04293e+07	6.14769e+07	3.009	1.59	0.0913008	0.237222	0.852461
Lenticin	C14 H18 N2 O2	9.658	247.145	246.137	2.23	[M+H]+1	RT, m/z	L1	829611	2.57842e+06	3.108	1.64	0.0025499	0.0188605	0.178106
Leucine/Isoleucine	C6 H13 N O2	12.272	130.088	131.095	2.77	[M-H]-1	RT, m/z, MS/MS	L1	1.2395e+07	6.76159e+07	5.455	2.45	0.000452121	0.0057047	0.987291
L-Glutathione oxidized	C20 H32 N6 O12 S2	12.455	613.161	612.154	3	[M+H]+1	m/z, MS/MS	L2	1.47915e+07	4.63381e+07	3.133	1.65	0.00132339	0.0121559	0.724488
L-Histidine	C6 H9 N3 O2	13.394	156.077	155.07	2.51	[M+H]+1	RT, m/z, MS/MS	L1	9.87207e+08	2.90725e+09	2.945	1.56	0.00411688	0.0266699	5.88274
L-Lysine	C6 H14 N2 O2	19.785	147.113	146.106	2.38	[M+H]+1	RT, m/z, MS/MS	L1	2.39907e+08	6.31439e+08	2.632	1.4	0.0607895	0.178189	2.51883
L-Proline	C5 H9 N O2	12.377	116.071	115.064	3.9	[M+H]+1	RT, m/z, MS/MS	L1	6.3607e+08	4.51952e+09	7.105	2.83	5.99498e-05	0.00158037	8.05025
L-Serine	C3 H7 N O3	13.38	104.036	105.043	2.51	[M-H]-1	RT, m/z, MS/MS	L1	2.64849e+07	7.73944e+07	2.922	1.55	0.000434698	0.00553918	0.986603
L-Valine	C5 H11 N O2	9.769	118.087	117.079	2.13	[M+H]+1	RT, m/z, MS/MS	L1	2.93172e+07	7.04962e+07	2.405	1.27	0.0011833	0.0111978	0.897904
Malate	C4 H6 O5	12.143	133.015	134.022	3.69	[M-H]-1	RT, m/z, MS/MS	L1	4.25761e+07	1.61533e+08	3.794	1.92	0.704324	1	1.74147
Maleamate	C4 H5 N O3	8.85	114.02	115.027	2.69	[M-H]-1	RT, m/z	L1	2.55226e+07	5.56329e+07	2.18	1.12	0.000956747	0.00982447	0.790071
Methionine	C5 H11 N O2 S	11.281	148.044	149.051	2.31	[M-H]-1	RT, m/z, MS/MS	L1	1.25859e+07	1.66904e+07	1.326	0.41	0.839471	1	0.259479
Methylthioadenosine	C11 H15 N5 O3 S	6.838	298.098	297.09	2.83	[M+H]+1	RT, m/z	L1	7.10326e+06	3.24626e+07	4.57	2.19	0.290458	0.558216	0.552078
N,N-Dimethyl-1,4-Phenylenediamine	C8 H12 N2	4.84071	137.108	136.1	1.55	[M+H]+1	RT, m/z, MS/MS	L1	3.16047e+08	6.854e+08	2.169	1.12	6.07809e-10	7.8225e-07	2.74417
N,N-Dimethylarginine	C8 H18 N4 O2	19.426	203.151	202.143	2.45	[M+H]+1	RT, m/z	L1	1.21782e+07	3.29225e+07	2.703	1.43	0.000466714	0.00585059	0.682305
N2-Acetylornithine	C7 H14 N2 O3	12.434	175.108	174.101	3.42	[M+H]+1	RT, m/z	L1	8.46992e+06	2.99115e+07	3.532	1.82	8.86342e-05	0.0019012	0.593385
N6-(Delta2-Isopentenyl)-Adenine	C10 H13 N5	6.77	202.109	203.117	-0.44	[M-H]-1	RT, m/z	L1	724507	4.30108e+06	5.937	2.57	0.0909127	0.236851	0.210659
N-acetylaspartate	C6 H9 N O5	11.064	174.042	175.049	4.14	[M-H]-1	RT, m/z, MS/MS	L1	97958.9	574294	5.863	2.55	0.178168	0.387552	0.0820763
N-Acetylglutamate	C7 H11 N O5	11.908	188.057	189.064	3.31	[M-H]-1	RT, m/z	L1	1.97928e+06	56682.9	0.029	-5.13	0.709307	1	0.129527
N-Acetylglycine	C4 H7 N O3	9.5	98.0249	117.043	1.75	[M-H-H2O]-1	RT, m/z	L1	5.91273e+06	1.2692e+07	2.147	1.1	0.0507963	0.159063	0.399656
N-Acetylhistamine	C7 H11 N3 O	8.576	154.098	153.091	3.1	[M+H]+1	m/z, MS/MS	L2	1.5408e+06	3.61371e+06	2.345	1.23	0.081758	0.220592	0.311078
N-Acetyl-L-leucine	C8 H15 N O3	5	206.139	173.106	2.99	[M+H+MeOH]+1	RT, m/z	L1	1.94941e+06	2.63714e+06	1.353	0.44	0.950348	1	0.155604
N-Acetyl-methionine	C7 H13 N O3 S	4.866	190.055	191.062	3.15	[M-H]-1	RT, m/z	L1	4.19204e+06	1.16865e+07	2.788	1.48	0.012153	0.0563973	0.372975
N-Acetylneuraminic acid	C11 H19 N O9	11.653	310.114	309.107	3.7	[M+H]+1	RT, m/z, MS/MS	L1	3.2783e+06	1.41501e+07	4.316	2.11	0.00989625	0.0487365	0.42107
N-Acetylphenylalanine	C11 H13 N O3	6.809	208.097	207.09	2.7	[M+H]+1	RT, m/z	L1	5.26115e+06	1.23015e+07	2.338	1.23	0.531784	0.855151	0.393249
N-Acetylputrescine	C6 H14 N2 O	17.634	131.118	130.111	2.7	[M+H]+1	RT, m/z	L1	5.4125e+06	4.28139e+06	0.791	-0.34	0.448485	0.759141	0.17191
N-Alpha-Acetyl-L-lysine	C8 H16 N2 O3	11.964	189.124	188.117	2.31	[M+H]+1	RT, m/z	L1	559088	9.1288e+06	16.328	4.03	0.006715	0.0378187	0.327468
N-Formyl-L-Methionine	C6 H11 N O3 S	4.864	176.039	177.047	3.18	[M-H]-1	RT, m/z	L1	507797	1.34412e+06	2.647	1.4	0.0325973	0.115785	0.131066
Niacinamide	C6 H6 N2 O	6.832	123.055	122.048	2.13	[M+H]+1	RT, m/z, MS/MS	L1	1.35489e+08	3.47865e+08	2.567	1.36	0.0921846	0.239197	1.86662
O-Acetyl-L-carnitine	C9 H17 N O4	11.511	204.124	203.116	2.77	[M+H]+1	RT, m/z, MS/MS	L1	5.77149e+07	2.06462e+08	3.577	1.84	0.985959	1	1.15987
O-Phosphoserine	C3 H8 N O6 P	11.724	184.002	185.01	4.49	[M-H]-1	RT, m/z	L1	20950.4	3.20535e+06	152.997	7.26	0.147311	0.33615	0.206645
Ophthalmate	C11 H19 N3 O6	11.785	290.135	289.128	2.13	[M+H]+1	RT, m/z	L1	829124	5.29336e+06	6.384	2.67	0.514644	0.835241	0.206404
O-Succinyl-L-homoserine	C8 H13 N O6	11.729	218.068	219.075	3.99	[M-H]-1	RT, m/z	L1	473629	1.11735e+06	2.359	1.24	0.981173	1	0.0967867
Palmitic Acid	C16 H32 O2	3.624	255.234	256.241	2.7	[M-H]-1	m/z, MS/MS	L2	5.97621e+08	1.06888e+09	1.789	0.84	0.360748	0.6519	2.17268
Pantothenate	C9 H17 N O5	7	220.118	219.111	2.51	[M+H]+1	RT, m/z	L1	3.96419e+07	9.4827e+07	2.392	1.26	0.0333342	0.117571	1.01076
Phenylalanine	C9 H11 N O2	10.247	164.072	165.079	2.53	[M-H]-1	RT, m/z, MS/MS	L1	9.05091e+07	2.43872e+08	2.694	1.43	0.0137096	0.0616535	1.5287
Phenylpyruvate	C9 H8 O3	4.46	182.082	164.048	2.76	[M+NH4]+1	RT, m/z	L1	186685	1.99626e+09	10693.2	13.38	0.0166131	0.0714203	5.27755
Phosphocreatine	C4 H10 N3 O5 P	11.647	212.044	211.036	2.97	[M+H]+1	RT, m/z, MS/MS	L1	1.08603e+08	4.40957e+08	4.06	2.02	0.00423059	0.0270436	2.45927
Phosphorylcholine	C5 H14 N O4 P	13.111	184.074	183.067	3.58	[M+H]+1	RT, m/z	L1	3.48477e+06	3.65386e+07	10.485	3.39	7.82513e-06	0.000450938	0.800697
Pipecolate	C6 H11 N O2	11.427	130.087	129.079	2.4	[M+H]+1	RT, m/z	L1	4.41783e+06	9.20002e+06	2.082	1.06	0.000408109	0.00530082	0.331052
Pyridoxine	C8 H11 N O3	8.49	170.082	169.074	2.18	[M+H]+1	RT, m/z, MS/MS	L1	1.86724e+09	4.00689e+09	2.146	1.1	5.33954e-05	0.00148053	6.58593
Pyruvate	C3 H4 O3	14.76	87.0091	88.0164	3.85	[M-H]-1	m/z, MS/MS	L2	9.2134e+07	1.85892e+08	2.018	1.01	2.68136e-05	0.00103527	1.42981
Riboflavin (B2)	C17 H20 N4 O6	8.42	377.146	376.139	1.88	[M+H]+1	RT, m/z, MS/MS	L1	4.74837e+06	9.99439e+06	2.105	1.07	0.0924886	0.239503	0.323844
Ribothymidine	C10 H14 N2 O6	9.827	259.093	258.086	2.6	[M+H]+1	RT, m/z	L1	308397	3.06678e+06	9.944	3.31	0.492371	0.808407	0.214225
Sarcosine	C3 H7 N O2	13.107	90.0551	89.0479	2.2	[M+H]+1	RT, m/z, MS/MS	L1	2.02377e+08	7.69013e+08	3.8	1.93	0.000148981	0.00253399	3.2092
Stachydrine	C7 H13 N O2	13.371	144.102	143.095	2.58	[M+H]+1	RT, m/z	L1	1.04663e+07	2.35076e+07	2.246	1.17	0.0120543	0.0562542	0.485095
Stearic acid	C18 H36 O2	6.778	283.266	284.273	4.96	[M-H]-1	m/z, MS/MS	L2	9.99788e+06	4.38859e+07	4.39	2.13	0.00416463	0.0268441	0.661398
Succinate	C4 H6 O4	11.627	117.02	118.027	3.83	[M-H]-1	RT, m/z, MS/MS	L1	8.96438e+06	5.67463e+07	6.33	2.66	0.371104	0.663041	0.81713
Succinate anhydride	C4 H4 O3	13.795	99.009	100.016	2.55	[M-H]-1	RT, m/z	L1	4.05945e+06	1.41519e+07	3.486	1.8	0.000240675	0.00352089	0.441398
Taurine	C2 H7 N O3 S	12.854	126.022	125.015	3.29	[M+H]+1	RT, m/z, MS/MS	L1	3.07077e+08	7.67761e+08	2.5	1.32	0.0183118	0.076517	2.60167
Thiamine	C12 H16 N4 O S	4.932	265.113	264.105	3.06	[M+H]+1	m/z, MS/MS	L2	9.12294e+06	3.92615e+07	4.304	2.11	0.475604	0.792878	0.556318
Threonate	C4 H8 O5	11.349	135.03	136.038	4.18	[M-H]-1	RT, m/z	L1	1.41607e+07	2.65148e+07	1.872	0.9	0.0315567	0.11292	0.443806
Threonine	C4 H9 N O3	12.686	120.066	119.059	3.15	[M+H]+1	RT, m/z, MS/MS	L1	3.97725e+08	1.09267e+09	2.747	1.46	0.00249185	0.0185734	3.39693
Thymine	C5 H6 N2 O2	5.5	125.036	126.043	3.14	[M-H]-1	RT, m/z	L1	8.30041e+06	1.39373e+07	1.679	0.75	0.0485947	0.153917	0.377404
Trans-4-Hydroxy-L-Proline	C5 H9 N O3	12.896	132.066	131.059	2.27	[M+H]+1	RT, m/z, MS/MS	L1	9.41069e+07	3.15835e+08	3.356	1.75	5.14469e-05	0.00147899	2.07313
Trehalose	C12 H22 O11	13.363	365.106	342.117	2.98	[M+Na]+1	RT, m/z	L1	2.90857e+07	2.80238e+06	0.096	-3.38	9.54824e-07	0.000104392	0.692658
Trigonelline	C7 H7 N O2	11.962	138.055	137.048	1.87	[M+H]+1	RT, m/z	L1	2.19929e+06	7.23511e+06	3.29	1.72	0.0184957	0.0768697	0.308359
Trimethylacetic Acid	C5 H10 O2	4.863	101.061	102.068	2.56	[M-H]-1	RT, m/z, MS/MS	L1	6.20339e+06	1.37914e+07	2.223	1.15	0.00602102	0.0349057	0.377887
Tryptophan	C11 H12 N2 O2	11.216	203.083	204.09	2.58	[M-H]-1	RT, m/z, MS/MS	L1	2.46323e+07	3.10012e+07	1.259	0.33	0.949742	1	0.33554
Tyrosine	C9 H11 N O3	12.239	180.067	181.074	2.98	[M-H]-1	RT, m/z, MS/MS	L1	1.93867e+07	5.09258e+07	2.627	1.39	0.926254	1	1.29302
UDP	C9 H14 N2 O12 P2	12.829	405.011	404.003	3.08	[M+H]+1	RT, m/z	L1	2.01893e+06	8.2991e+06	4.111	2.04	0.0301406	0.109579	0.320804
UDP-Galactose	C15 H24 N2 O17 P2	12.122	584.089	566.056	1.84	[M+NH4]+1	RT, m/z, MS/MS	L1	4.08171e+06	260655	0.064	-3.97	0.749042	1	0.111599
UDP-Glucuronate	C15 H22 N2 O18 P2	12.819	598.071	580.037	4.56	[M+NH4]+1	RT, m/z, MS/MS	L1	906816	3.27737e+06	3.614	1.85	0.0268807	0.100666	0.200015
UDP-N-Acetylgalactosamine	C17 H27 N3 O17 P2	10.97	608.09	607.082	1.24	[M+H]+1	RT, m/z, MS/MS	L1	69150.1	212296	3.07	1.62	0.127289	0.302999	0.058954
Uracil	C4 H4 N2 O2	8	111.02	112.028	2.28	[M-H]-1	RT, m/z, MS/MS	L1	7.35602e+06	1.62662e+07	2.211	1.14	0.00301381	0.0213903	0.396748
Urate	C5 H4 N4 O3	11.141	167.022	168.029	3.99	[M-H]-1	RT, m/z	L1	24246.9	3.82816e+06	157.883	7.3	0.141016	0.325442	0.235187
Uridine	C9 H12 N2 O6	9.5	243.063	244.071	4.72	[M-H]-1	RT, m/z	L1	918419	1.65824e+06	1.806	0.85	0.144321	0.331481	0.096872
Urocanate	C6 H6 N2 O2	10.749	139.051	138.043	3.81	[M+H]+1	RT, m/z, MS/MS	L1	1.51553e+06	7.6436e+06	5.044	2.33	0.000268332	0.00378114	0.341466
UTP	C9 H15 N2 O15 P3	13.09	484.976	483.969	0.81	[M+H]+1	RT, m/z	L1	7.82231e+06	1.90807e+07	2.439	1.29	0.0108636	0.0519113	0.478403
Xanthine	C5 H4 N4 O2	9.998	151.027	152.034	4.2	[M-H]-1	RT, m/z	L1	5.6547e+06	1.47843e+07	2.615	1.39	0.152541	0.345431	0.382802
Xylitol	C5 H12 O5	11.821	153.076	152.069	2.92	[M+H]+1	RT, m/z	L1	262688	320504	1.22	0.29	0.862358	1	0.0489297
α-ketoisovalerate	C5 H8 O3	4.775	115.04	116.048	3.33	[M-H]-1	RT, m/z, MS/MS	L1	3.32132e+07	1.11419e+08	3.355	1.75	0.00454226	0.0284241	1.28555
β-NAD	C21 H27 N7 O14 P2	11.559	664.118	663.111	2.76	[M+H]+1	RT, m/z, MS/MS	L1	1.10711e+07	2.88172e+07	2.603	1.38	0.728517	1	0.381382

## Sheet: Table S4
Table S4 Significantly altered metabolic pathways annotated in Hs578T cells due to doxorubicin treatment (Dox 3 d compared to Control 3 d)
Pathway	Total number of metabolites	Metabolite hits	p-value	Log (p-value)	Adjusted p-value	Pathway Impact
Taurine and hypotaurine metabolism	8	2	0.013998	1.8539	0.029615	0.82857
Histidine metabolism	16	6	0.00097409	3.0114	0.0035067	0.43442
Nicotinate and nicotinamide metabolism	15	3	0.010277	1.9881	0.024129	0.42895
Glycine, serine and threonine metabolism	33	9	0.0015622	2.8063	0.0044398	0.40765
Arginine and proline metabolism	36	11	0.0014002	2.8538	0.0042005	0.3279
Cysteine and methionine metabolism	33	8	6.1213e-05	4.2132	0.00041319	0.28537
Pyrimidine metabolism	39	10	5.5323e-06	5.2571	0.00011974	0.26263
Glycerophospholipid metabolism	36	6	2.2389e-06	5.65	0.00011974	0.23023
Pyruvate metabolism	23	3	0.00029077	3.5365	0.0014274	0.21967
Tryptophan metabolism	41	3	2.7246e-05	4.5647	0.00029426	0.17085
Starch and sucrose metabolism	18	2	0.0036516	2.4375	0.0093898	0.13851
Glycerolipid metabolism	16	3	0.013269	1.8772	0.029615	0.13707
Lysine degradation	30	4	0.0027049	2.5678	0.0073032	0.11247
beta-Alanine metabolism	21	5	0.00096926	3.0136	0.0035067	0.11194
Glycolysis / Gluconeogenesis	26	3	0.00033376	3.4766	0.0015019	0.09785
Purine metabolism	70	12	0.019496	1.7101	0.038991	0.0826
Vitamin B6 metabolism	9	1	0.00020876	3.6803	0.0012526	0.07843
Pantothenate and CoA biosynthesis	20	6	6.6522e-06	5.177	0.00011974	0.03401
Valine, leucine and isoleucine degradation	40	3	1.9512e-05	4.7097	0.00026341	0.01084
Primary bile acid biosynthesis	46	1	0.014259	1.8459	0.029615	0.00758
Sphingolipid metabolism	32	2	4.1739e-05	4.3795	0.00037565	0.00125
Ether lipid metabolism	20	1	5.5769e-05	4.2536	0.00041319	0
D-Amino acid metabolism	15	2	0.00028668	3.5426	0.0014274	0
Mannose type O-glycan biosynthesis	17	1	0.00083349	3.0791	0.0034622	0
Valine, leucine and isoleucine biosynthesis	8	3	0.0011909	2.9241	0.0040191	0
Lipoic acid metabolism	28	2	0.0013614	2.866	0.0042005	0
Biotin metabolism	10	1	0.0076693	2.1152	0.018825	0
